# Supplementary material
Source: PubMed Central journal article supplement (PMC4807737)
Supplement: NIHMS767330-supplement-spectral_data__etc_.pdf [file NIHMS767330-supplement-spectral_data__etc_.pdf]

## Models of the Ni-L and Ni-SI<sub>a</sub> States of the [NiFe]- Hydrogenase Active Site

Geoffrey M. Chambers, Mioy T. Huynh, Yulong Li, Sharon Hammes-Schiffer\*, Thomas B. Rauchfuss\*, Edward Reijerse, Wolfgang Lubitz\*

|                                                                                                                                                                                                                                      |         |
|--------------------------------------------------------------------------------------------------------------------------------------------------------------------------------------------------------------------------------------|---------|
| Mössbauer Spectra of <b>[1a-c]</b> <sup>+</sup> and <b>[1a-c]</b> <sup>0</sup> at 0T and <b>[1a]</b> <sup>0</sup> at 7T                                                                                                              | S3-S9   |
| Q-Band DAVIES ENDOR of <b>[1a]</b> <sup>0</sup> and <b>[1a-d<sub>5</sub>]</b> <sup>0</sup>                                                                                                                                           | S10-S12 |
| <sup>1</sup> H NMR and <sup>31</sup> P{ <sup>1</sup> H}-NMR Spectra of <b>[1a-d]</b> BF <sub>4</sub>                                                                                                                                 | S13-S16 |
| <sup>1</sup> H NMR spectra of Products from Treating <b>[1a]</b> <sup>0</sup> and <b>[1b]</b> <sup>0</sup> with excess HBF <sub>4</sub>                                                                                              | S17-18  |
| <sup>31</sup> P{ <sup>1</sup> H} NMR spectra of Products from Treating <b>[1a]</b> <sup>0</sup> and <b>[1b]</b> <sup>0</sup> with excess HBF <sub>4</sub>                                                                            | S19     |
| <sup>1</sup> H NMR and <sup>31</sup> P{ <sup>1</sup> H}-NMR Spectra of Fe(dppv)(SPh) <sub>2</sub> (CO) <sub>2</sub> , <b>[2bCO]</b> BF <sub>4</sub> and <b>[2b]</b> BF <sub>4</sub>                                                  | S20-S21 |
| Cyclic Voltammograms of <b>[1b-d]</b> BF <sub>4</sub> , <b>[2b]</b> BF <sub>4</sub> , and H <sup>+</sup> Reduction Catalysis                                                                                                         | S22-S23 |
| IR Spectra of <b>[1a-d]</b> BF <sub>4</sub> , Fe(dppv)(SPh) <sub>2</sub> (CO) <sub>2</sub> , <b>[2bCO]</b> BF <sub>4</sub> , <b>[1a-d]</b> <sup>0</sup> , and <b>[2b]</b> <sup>0</sup>                                               | S23-28  |
| X-band CW-EPR Spectra of <b>[1b-d]</b> <sup>0</sup> and <b>[2b]</b> <sup>0</sup>                                                                                                                                                     | S29-S30 |
| Solid State Structure of <b>[1c]</b> BF <sub>4</sub>                                                                                                                                                                                 | S31     |
| Solid State Structure of <b>[1d]</b> BF <sub>4</sub>                                                                                                                                                                                 | S31     |
| Solid State Structure of <b>[2bCO]</b> BF <sub>4</sub>                                                                                                                                                                               | S32     |
| Mass Spectrum of [(C <sub>5</sub> D <sub>5</sub> )Ni(pdt)Fe(CO)(dppe)]BF <sub>4</sub>                                                                                                                                                | S32     |
| Calculated Reduction Potentials for <b>[1a-d]</b> <sup>+</sup> Using Different Functionals                                                                                                                                           | S33     |
| Calculated Δ $\tilde{\nu}_{\text{CO}}$ for <b>[1a-d]</b> <sup>+0</sup> using Different Functionals                                                                                                                                   | S34     |
| Comparison of Crystal Structure and DFT Optimized Structures Using Different Functionals of <b>[1a]</b> <sup>+</sup> , <b>[1a]</b> <sup>0</sup> , <b>[1c]</b> <sup>+</sup> , <b>[1d]</b> <sup>+</sup> , and <b>[2b]</b> <sup>0</sup> | S34-S36 |
| Calculated ΔG <sup>o</sup> and ΔG <sup>‡</sup> Values for Isomerization of Fe(CO)(dppe) from Dibasal to Apical-Basal for all Intermediates in Proposed Catalytic Cycle of <b>[1a]</b> <sup>+</sup>                                   | S37     |
| Calculated Spin Densities and Structures of <b>[1a]</b> <sup>0</sup> , <b>[H1a]</b> <sup>+</sup> , and <b>[H1a]</b> <sup>0</sup>                                                                                                     | S37     |
| Calculated $\tilde{\nu}_{\text{CO}}$ for all Intermediates in Proposed Catalytic Cycle of <b>[1a]</b> <sup>+</sup>                                                                                                                   | S37     |

|                                                                                     |           |
|-------------------------------------------------------------------------------------|-----------|
| Discussion of Electronic Structure of $[1a]^+$ , $[1a]^0$ , $[2b]^+$ , and $[2b]^0$ | S38-S40   |
| Discussion of Isomerization between Cycle A and Cycle B for $[1a]^+$ and $[1a]^0$   | S41       |
| Cartesian Coordinates of the Optimized Structures of $[1a]^+$                       | S42-S55   |
| Cartesian Coordinates of the Optimized Structures of $[1a]^0$                       | S56-S65   |
| Cartesian Coordinates of the Optimized Structures of $[1a]^-$                       | S66-S69   |
| Cartesian Coordinates of the Optimized Structures of $[1a]^{2+}$                    | S70-S73   |
| Cartesian Coordinates of the Optimized Structures of $[H1a]^+$                      | S74-S85   |
| Cartesian Coordinates of the Optimized Structures of $[H1a]^0$                      | S86-S97   |
| Cartesian Coordinates of the Optimized Structures of $[H_21a]^+$                    | S98-S109  |
| Cartesian Coordinates of the Optimized Structures of $[1b]^+$                       | S110-S113 |
| Cartesian Coordinates of the Optimized Structures of $[1b]^0$                       | S114-S117 |
| Cartesian Coordinates of the Optimized Structures of $[1b]^-$                       | S118-S121 |
| Cartesian Coordinates of the Optimized Structures of $[1b]^{2+}$                    | S122-S125 |
| Cartesian Coordinates of the Optimized Structures of $[1c]^+$                       | S126-S129 |
| Cartesian Coordinates of the Optimized Structures of $[1c]^0$                       | S130-S133 |
| Cartesian Coordinates of the Optimized Structures of $[1c]^-$                       | S134-S137 |
| Cartesian Coordinates of the Optimized Structures of $[1c]^{2+}$                    | S138-S141 |
| Cartesian Coordinates of the Optimized Structures of $[1d]^+$                       | S142-S145 |
| Cartesian Coordinates of the Optimized Structures of $[1d]^0$                       | S146-S149 |
| Cartesian Coordinates of the Optimized Structures of $[1d]^-$                       | S150-S153 |
| Cartesian Coordinates of the Optimized Structures of $[1d]^{2+}$                    | S154-S157 |
| Cartesian Coordinates of the Optimized Structures of $[2b]^+$                       | S158-S161 |
| Cartesian Coordinates of the Optimized Structures of $[2b]^0$                       | S162-S165 |
| References                                                                          | S166      |

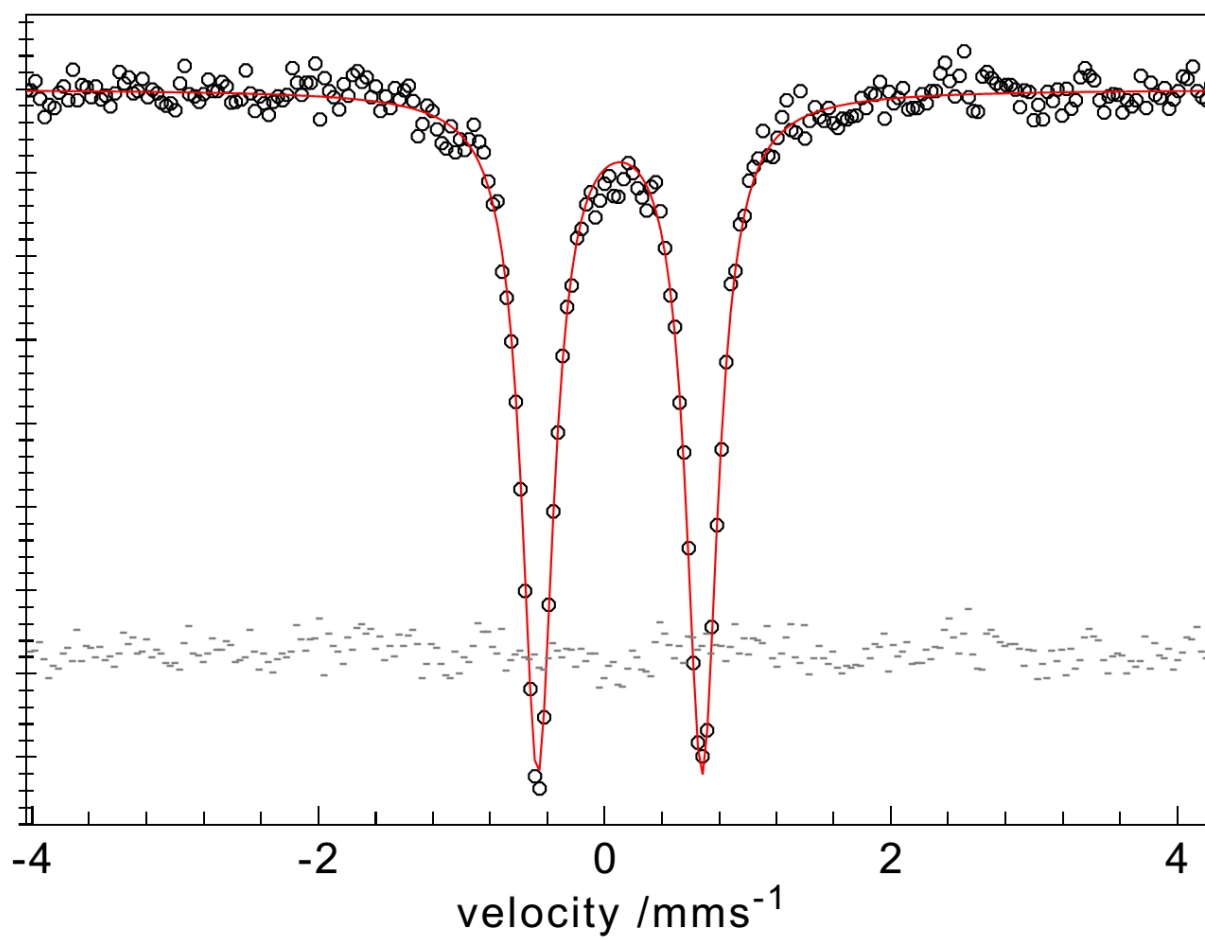

**Figure S1.** Mössbauer spectrum of  $[1\mathbf{a}]^+$  at 0T, 80K. Simulation parameters:  $\delta = 0.11$ ,  $\Delta E_q = 1.15$  mm/s.

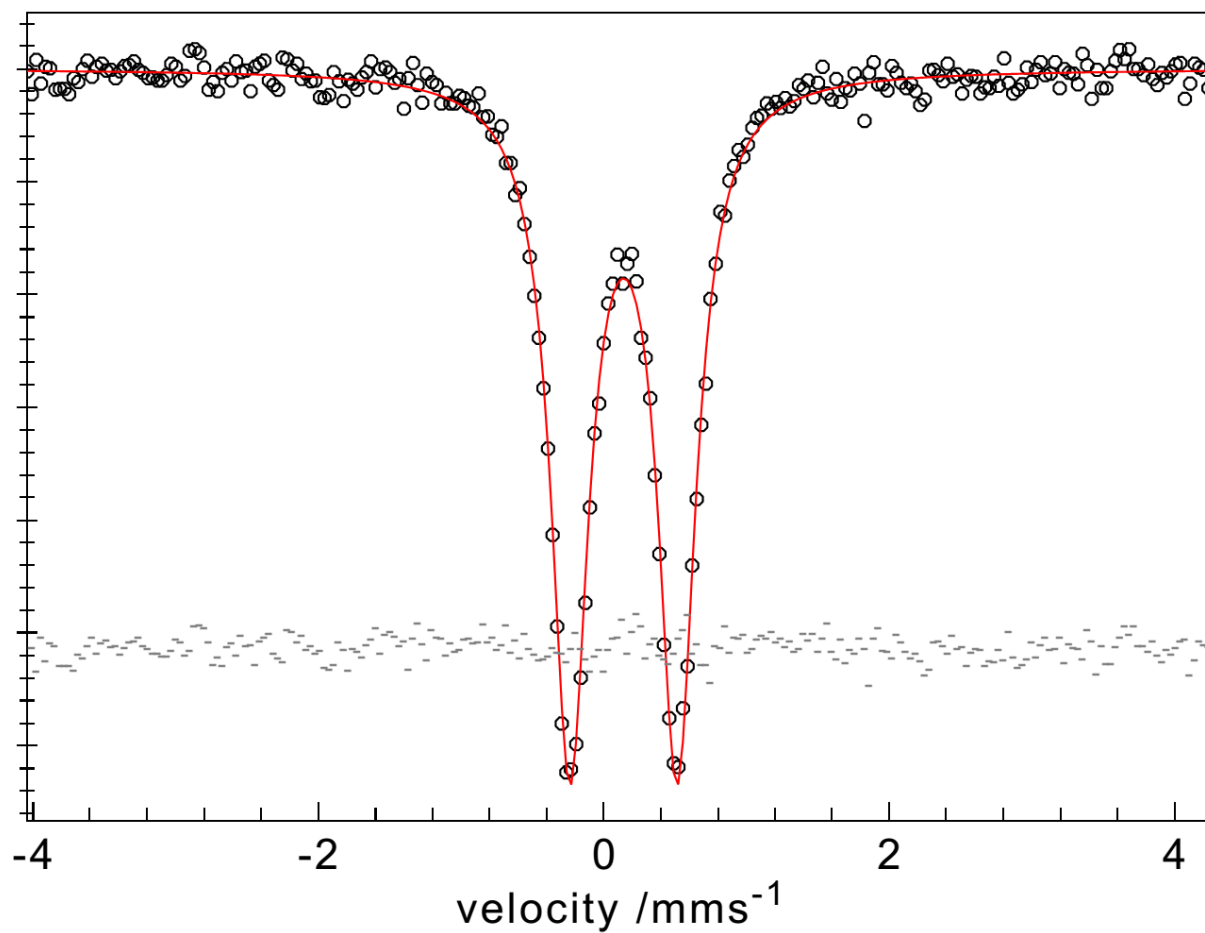

**Figure S2.** Mössbauer spectrum of  $[1a]^0$  at 0T, 80K. Simulation parameters:  $\delta = 0.14$ ,  $\Delta E_q = -0.75$  mm/s (sign obtained from Magnetic Mossbauer Spectra).

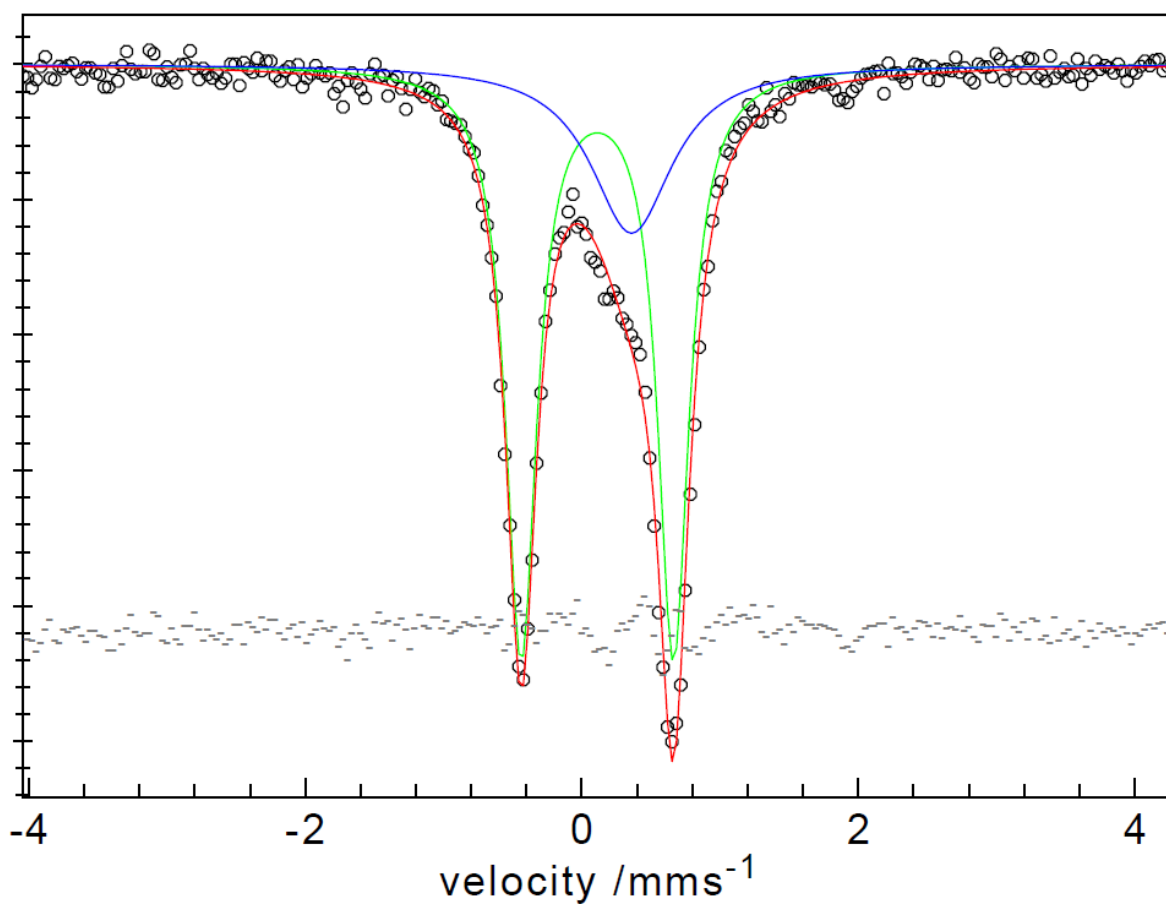

**Figure S3.** Mössbauer spectrum of  $[1\mathbf{b}]^+$  at 0T, 80K. Simulation parameters:  $\delta = 0.11$ ,  $\Delta E_q = 1.10$  mm/s at 73% contribution. An unknown impurity was simulated with parameters  $\delta = 0.36$ ,  $\Delta E_q = 0$  mm/s at 27% contribution.

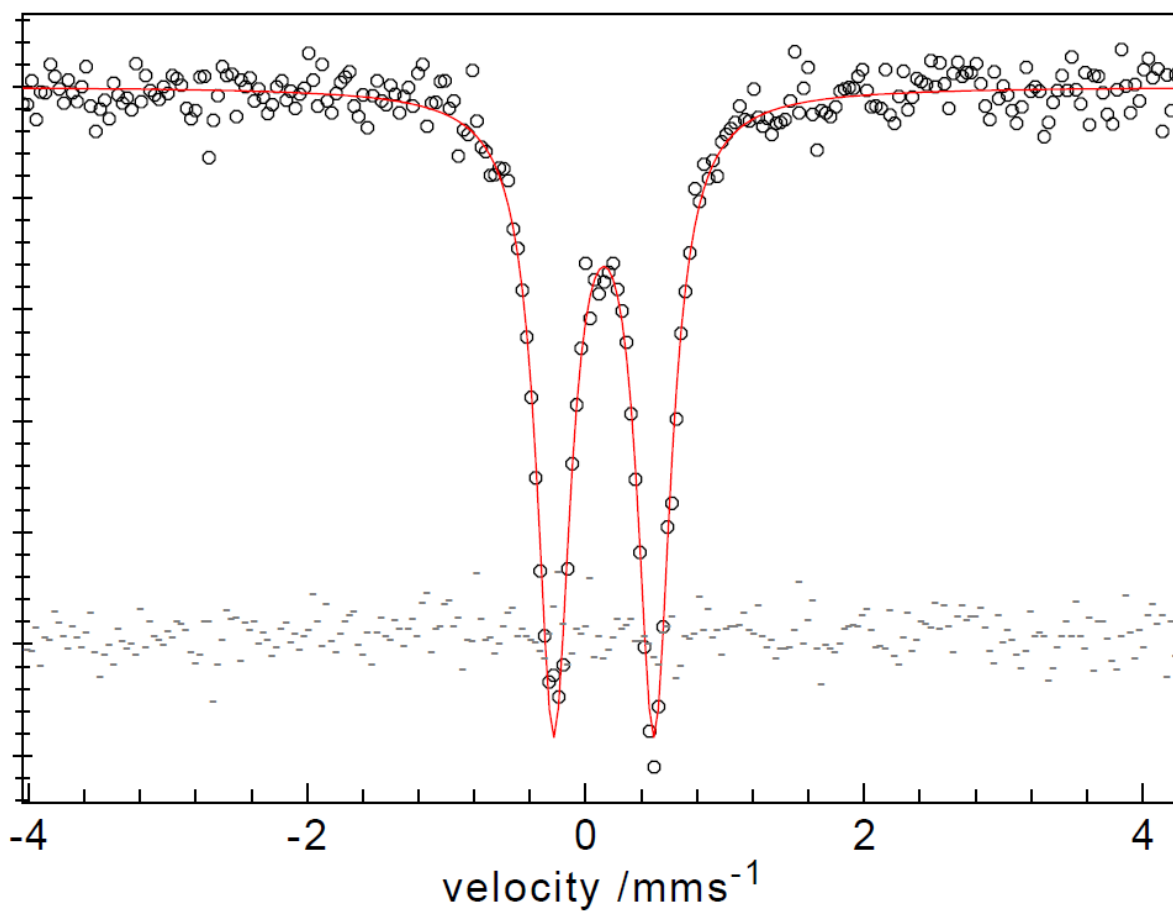

**Figure S4.** Mössbauer spectrum of  $[\mathbf{1b}]^0$  at 0T, 80K. Simulation parameters:  $\delta = 0.13$ ,  $\Delta E_q = 0.72$  mm/s.

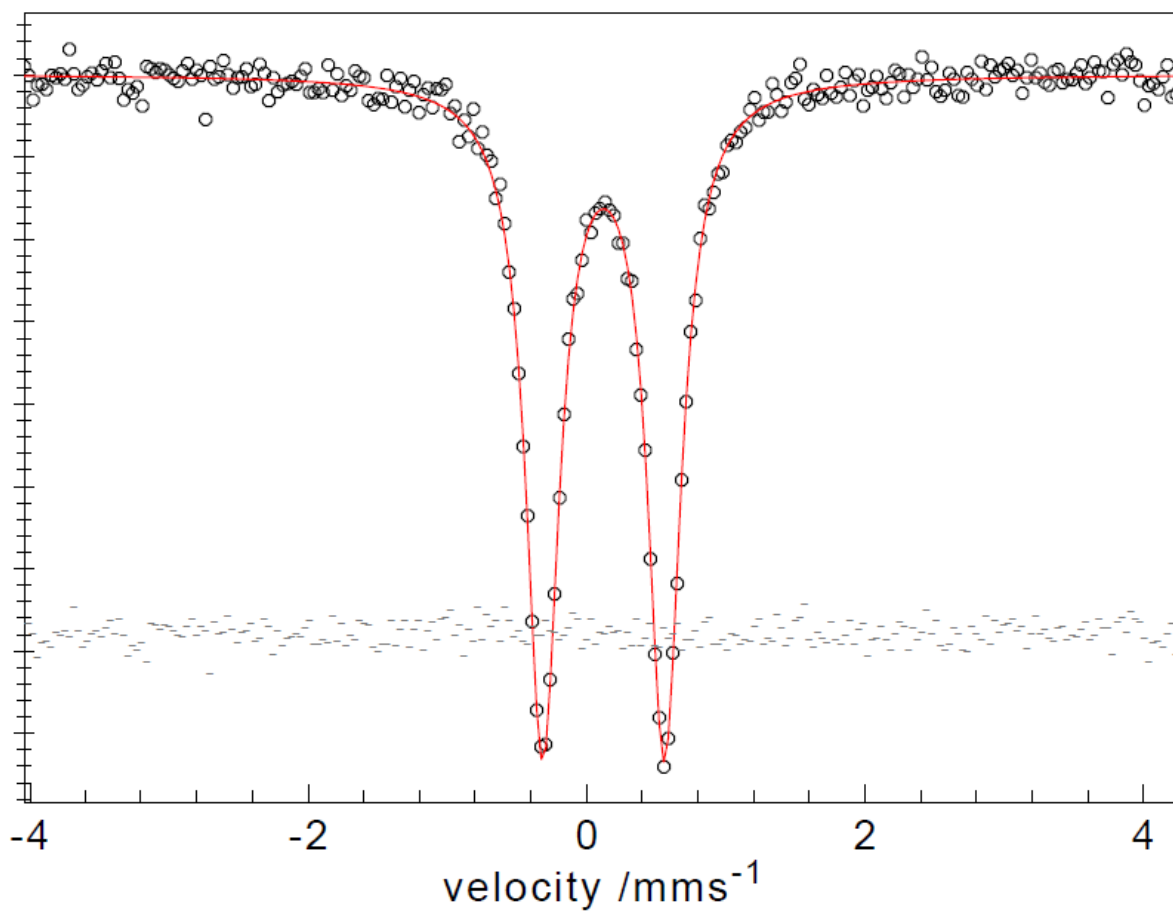

**Figure S5.** Mössbauer spectrum of  $[1c]^+$  at 0T, 80K. Simulation parameters:  $\delta = 0.12$ ,  $\Delta E_q = 0.87$  mm/s

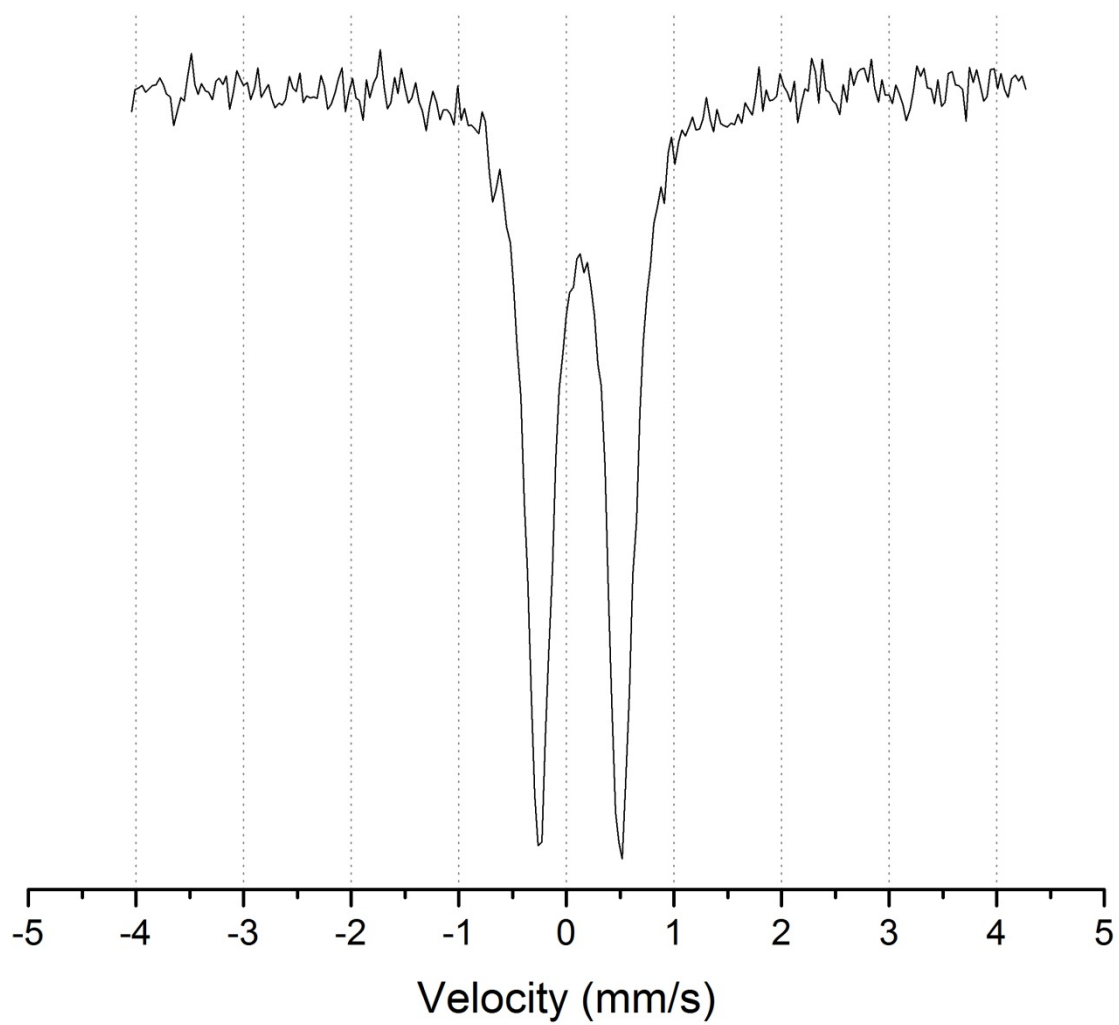

**Figure S6.** Mössbauer spectrum of  $[1c]^0$  at 0T, 80K. Simulation parameters:  $\delta = 0.13$ ,  $\Delta E_q = 0.78$  mm/s.



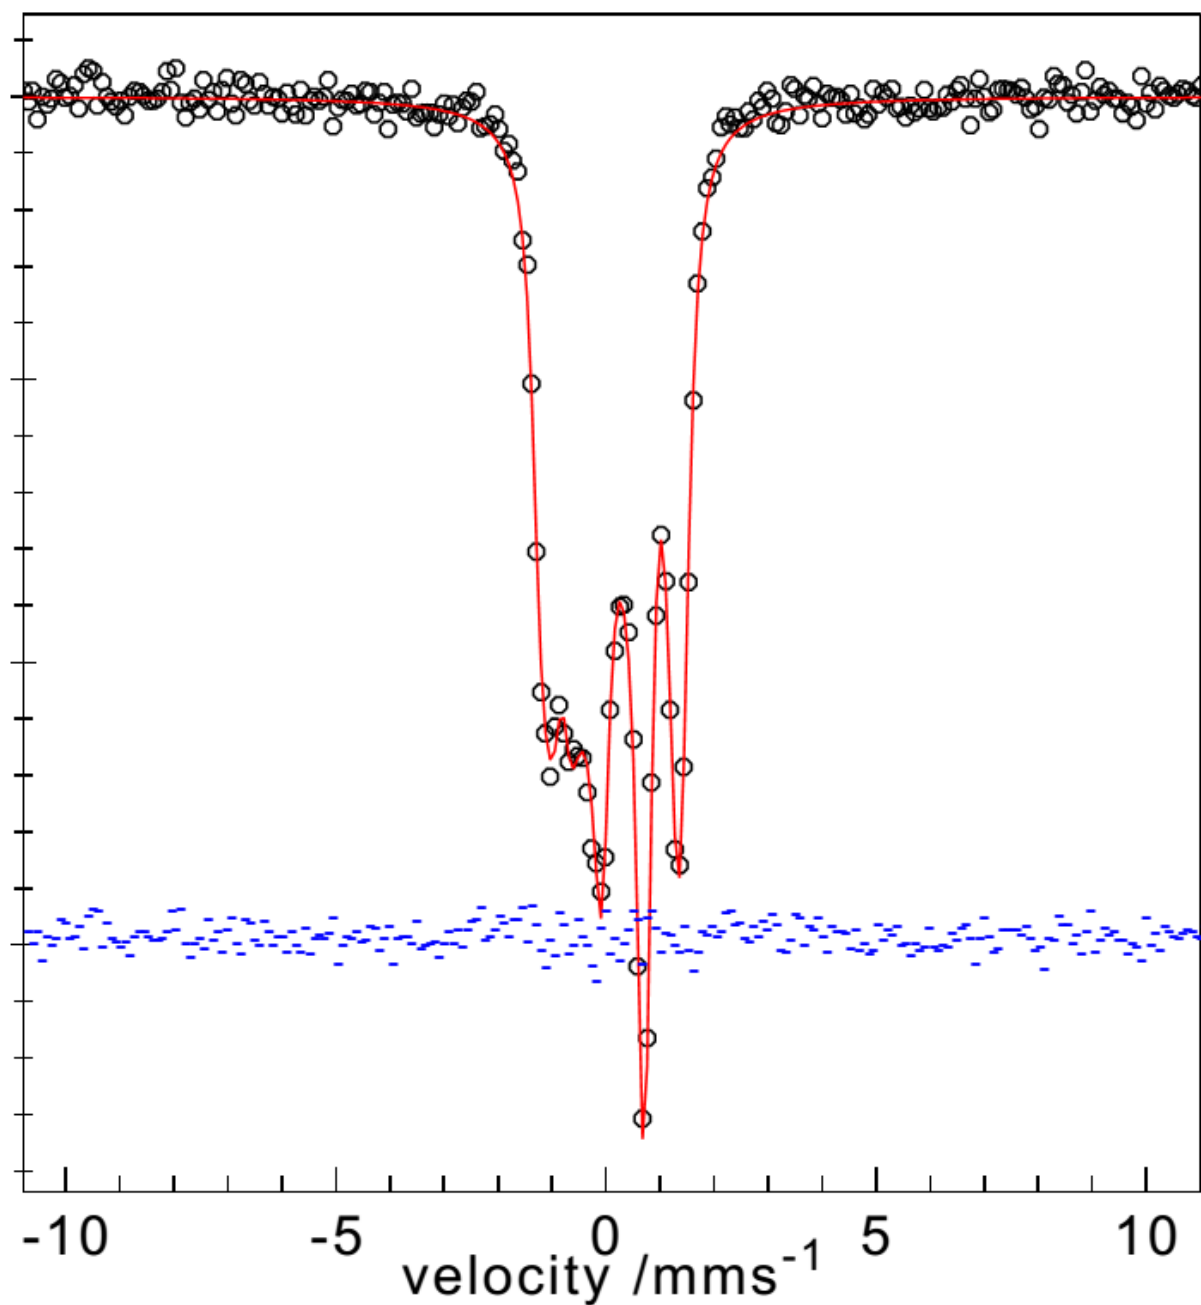

**Figure S7.** Mössbauer spectrum of  $[1\mathbf{a}]^0$  at 7T, 4.2K. Simulation parameters:  $\delta = 0.13$ ,  $\Delta E_q = -0.73$  mm/s,  $\eta = 0.13$ . HFI ( $^{57}\text{Fe}$ ) = (-28.81, -2.17, -6.02) kG = (-4.0 -0.30 -0.83) MHz.

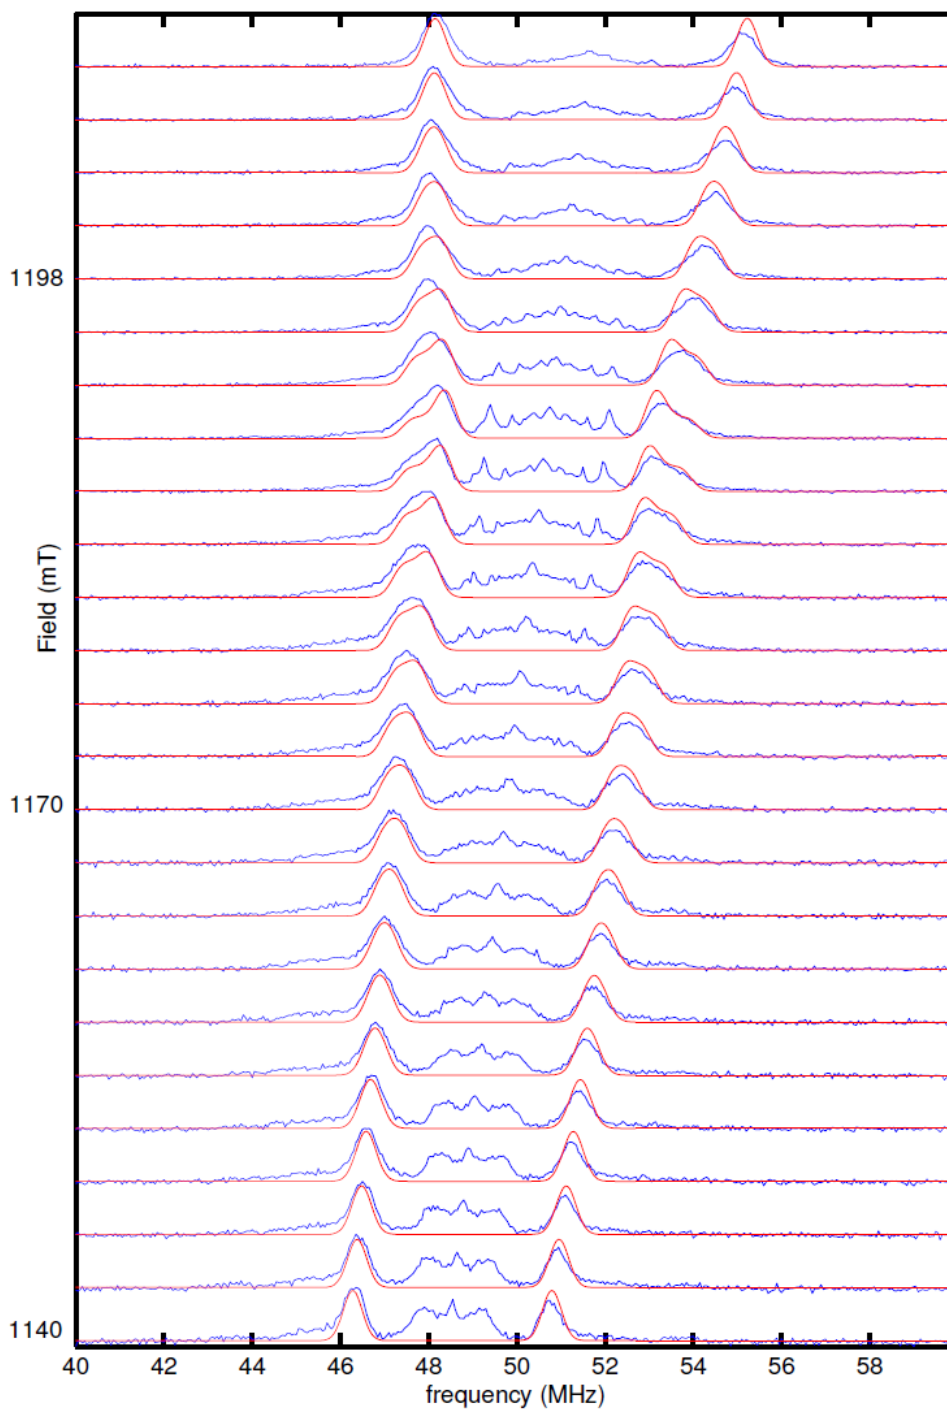

**Figure S8.** Q-band Davis ENDOR of  $[1\mathbf{a-d}_5]^0$  in proton frequency range. Simulation parameters:  $A_{\text{pdt}} = (7.3, 4.4, 4.36)$  MHz; MW frequency = 34.0434 GHz. Temperature 10K.  $\tau = 300$  ns,  $T_{\text{RF}} = 18$   $\mu\text{s}$ .

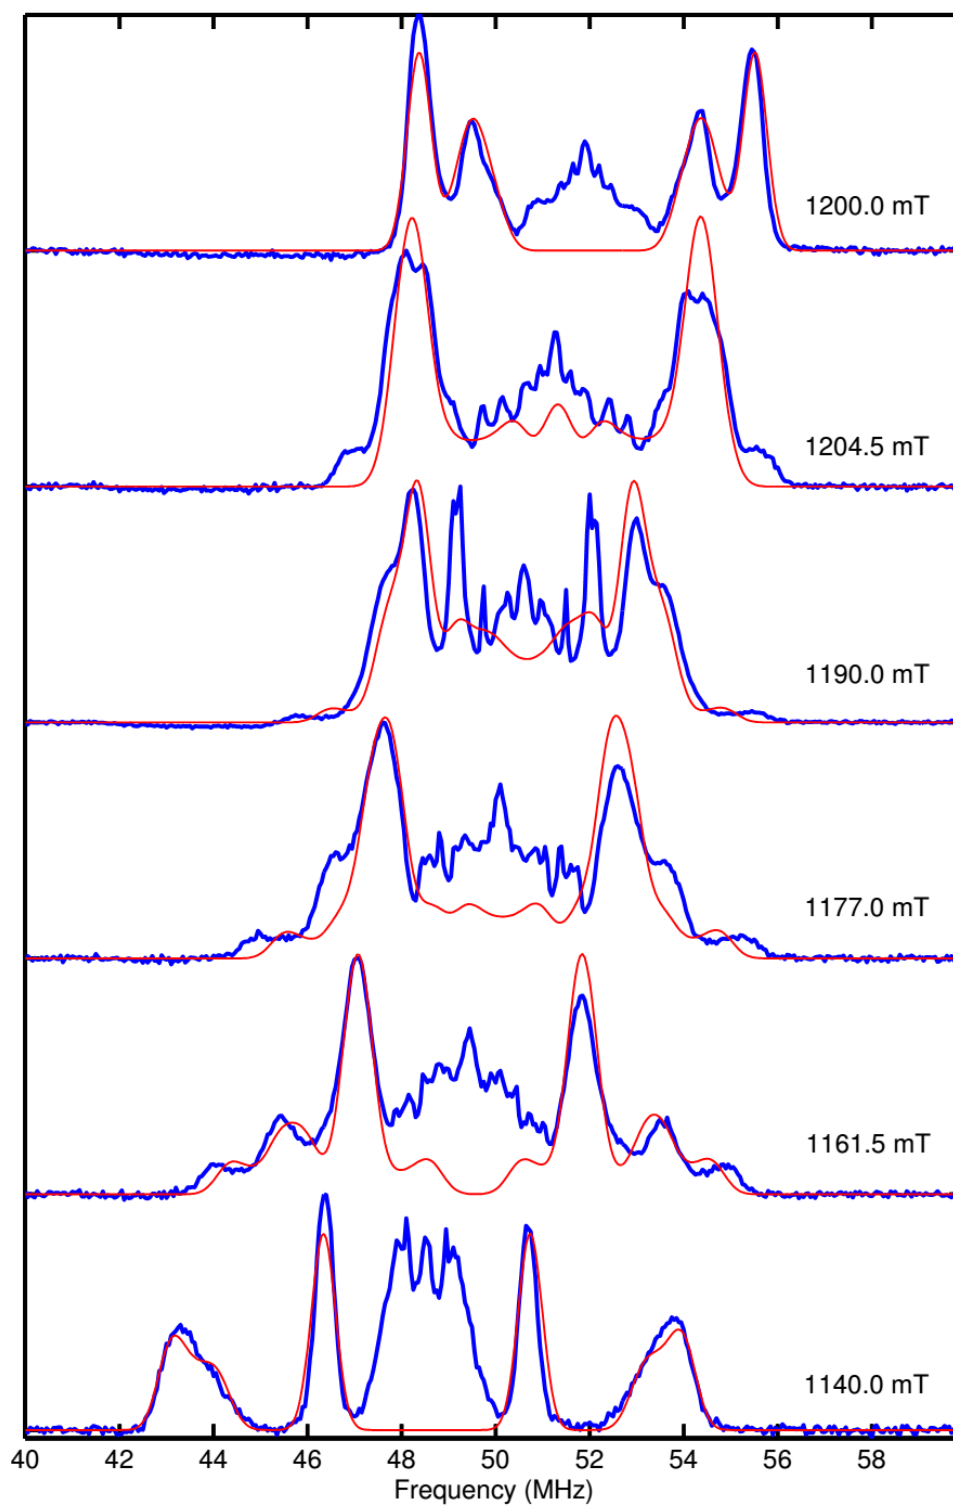

**Figure S9.** Q-band Davis ENDOR of  $[1\mathbf{a}]^0$  in proton range. Simulation parameters:  $A_{CP} = (-4.86, 3.25, -11.25)$  MHz;  $A_{\text{pdt}} = (7.3, 4.4, 4.36)$  MHz; MW frequency = 34.0434 GHz. Temperature 10K.  $\tau = 300$  ns,  $T_{\text{RF}} = 18$   $\mu\text{s}$ .

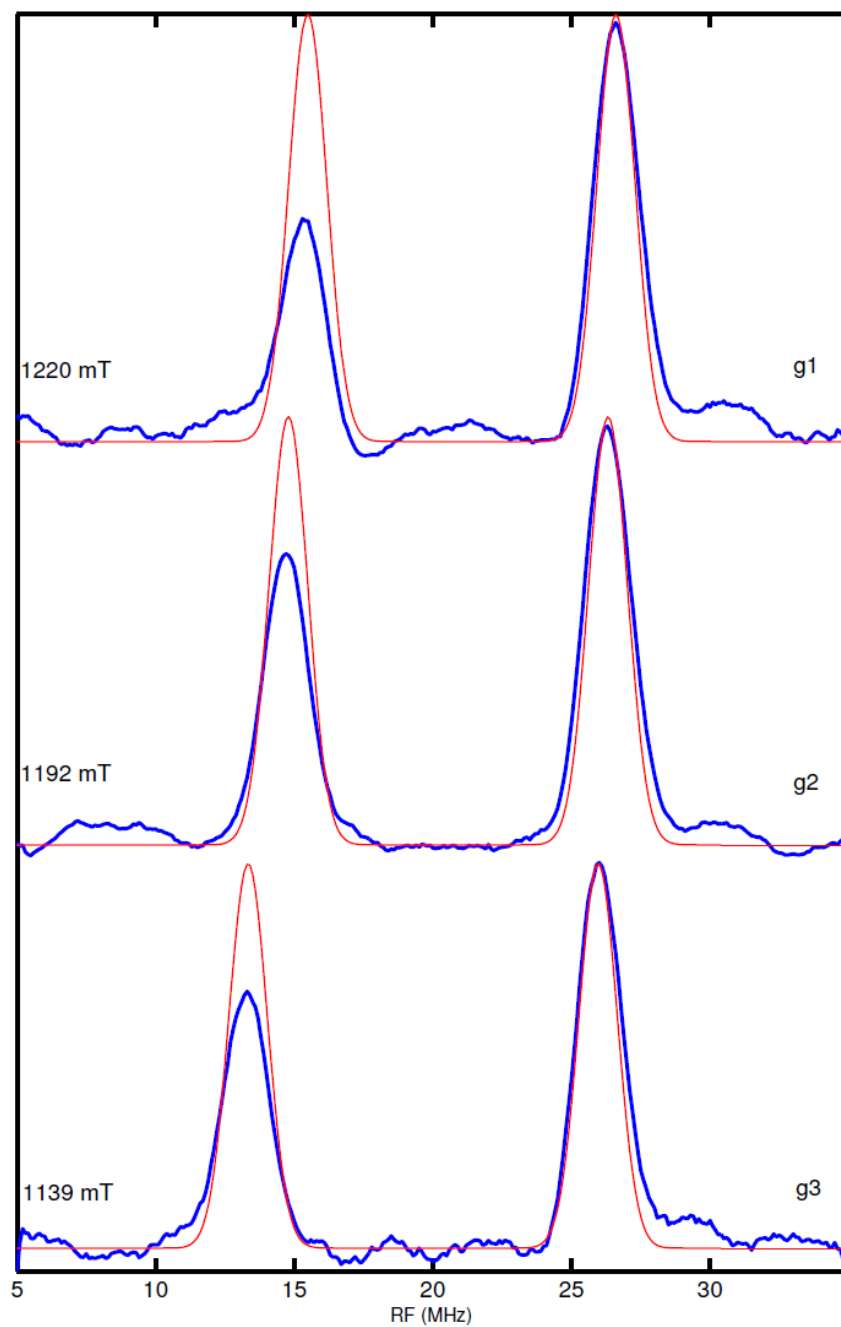

**Figure S10.** Q-band Davies ENDOR of  $[1\mathbf{a}]^0$  in  $^{31}\text{P}$  range. Simulation parameters:  $A = (11.1, 11.3, 12.7)$  MHz. MW frequency = 34.0434 GHz. Temperature 10K.  $\tau = 300$  ns,  $T_{\text{RF}} = 18$   $\mu\text{s}$ .

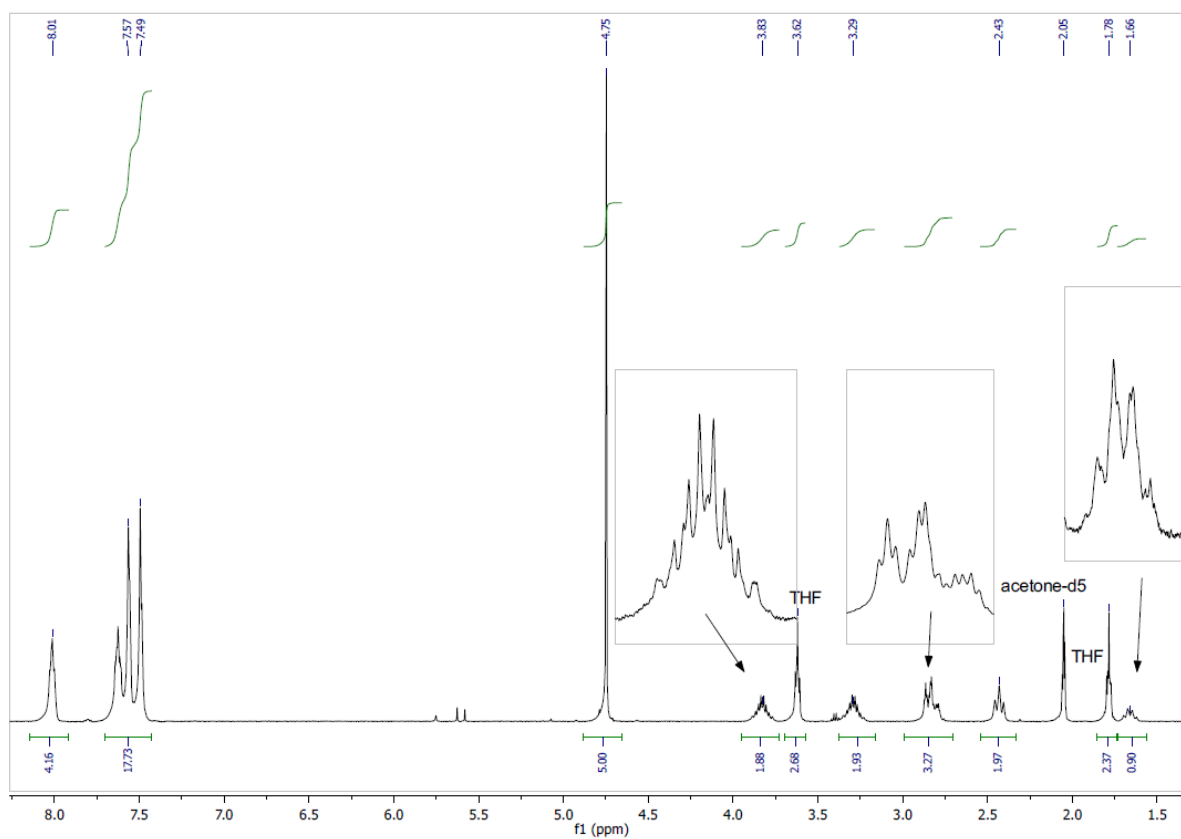

**Figure S11.**  $^1\text{H}$  NMR spectrum of  $[\mathbf{1a}]\text{BF}_4$  in acetone- $d_6$ .

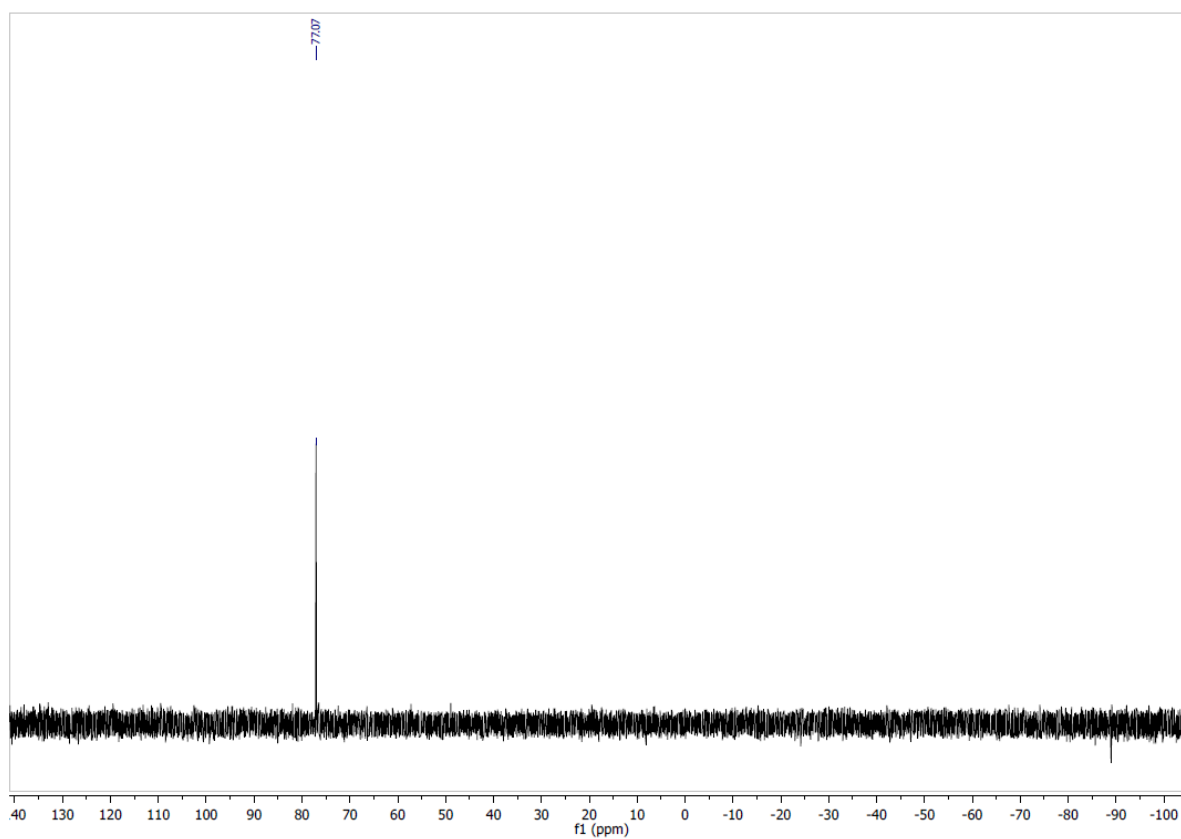

**Figure S12.**  $^{31}\text{P}\{\text{H}\}$  NMR spectrum of  $[\mathbf{1a}]\text{BF}_4$  in acetone- $d_6$ .

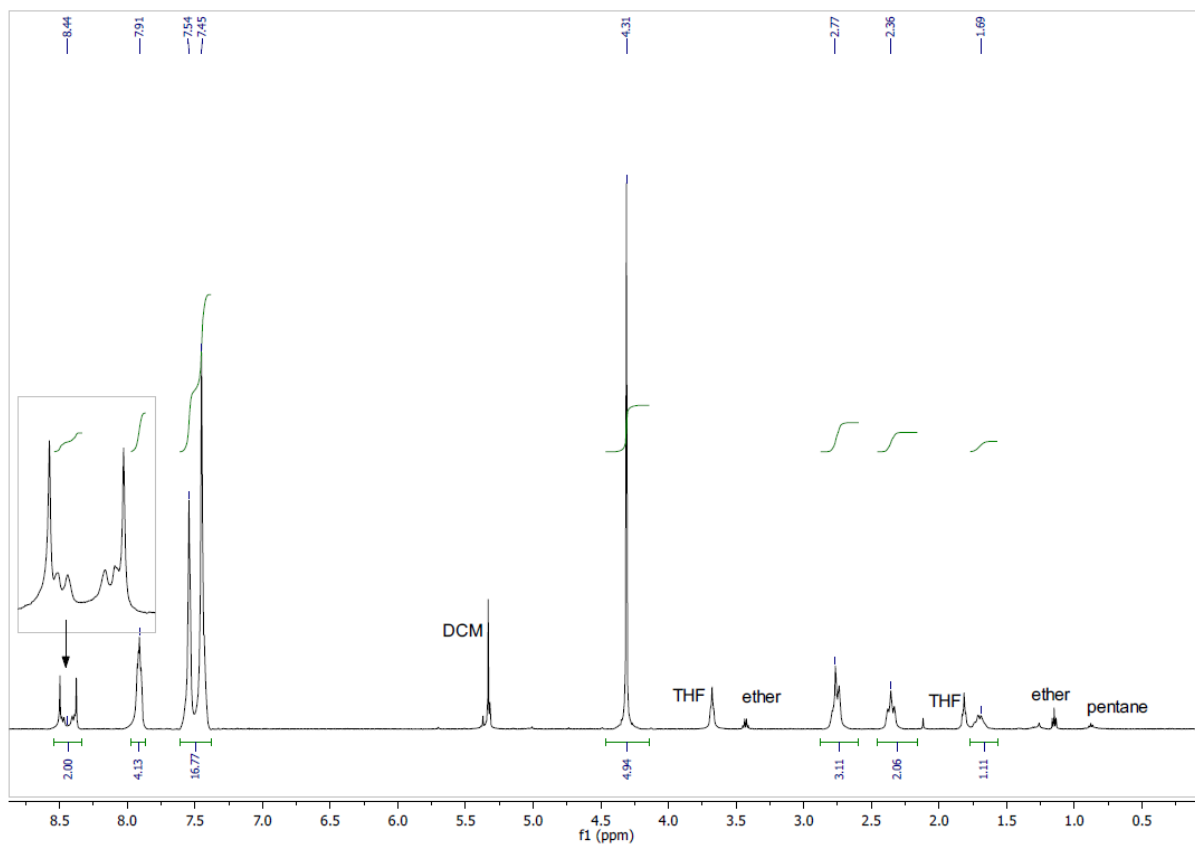

**Figure S13.**  $^1\text{H}$  NMR spectrum of  $[\mathbf{1b}]\text{BF}_4$  in  $\text{CD}_2\text{Cl}_2$ .

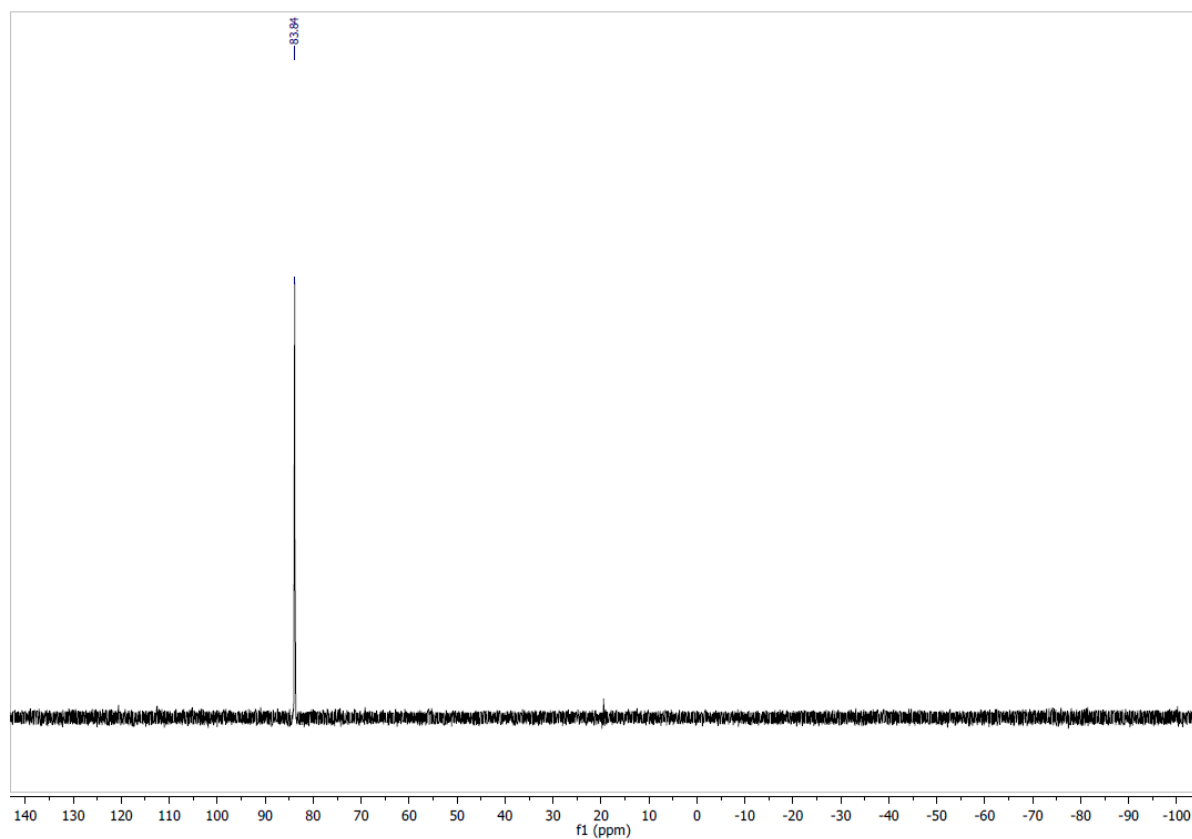

**Figure S14.**  $^{31}\text{P}\{\text{H}\}$  NMR spectrum of  $[\mathbf{1b}]\text{BF}_4$  in  $\text{CD}_2\text{Cl}_2$ .

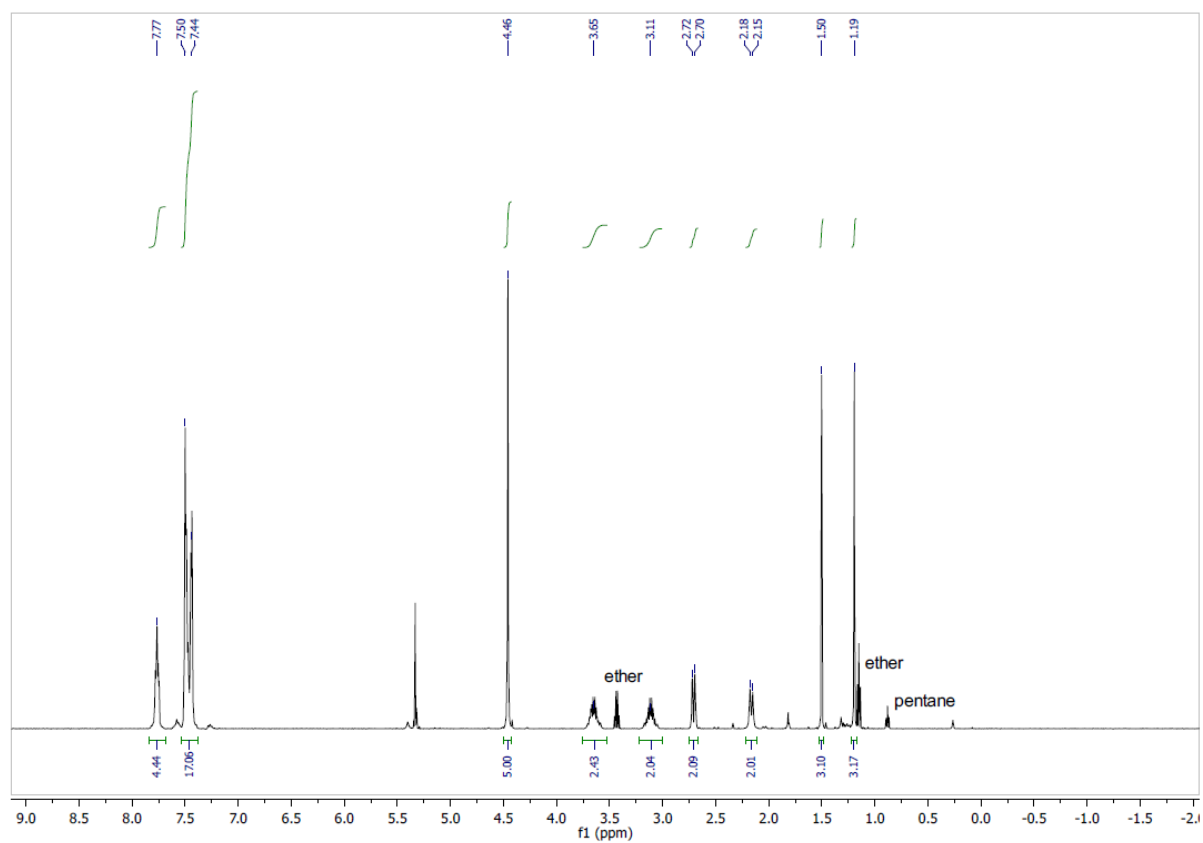

**Figure S15.**  $^1\text{H}$  NMR spectrum of  $[\mathbf{1c}]\text{BF}_4$  in  $\text{CD}_2\text{Cl}_2$ .

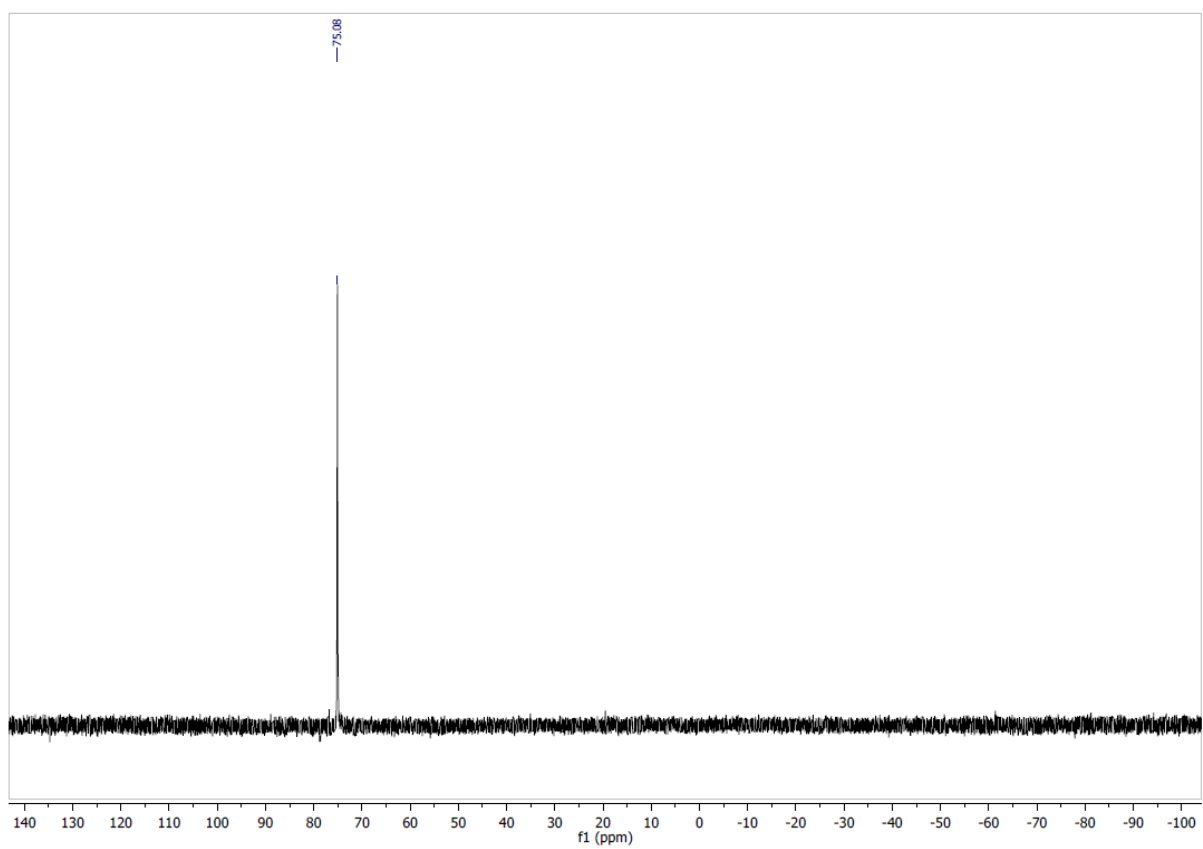

**Figure S16.**  $^{31}\text{P}\{\text{H}\}$  NMR spectrum of  $[\mathbf{1c}]\text{BF}_4$  in  $\text{CD}_2\text{Cl}_2$ .

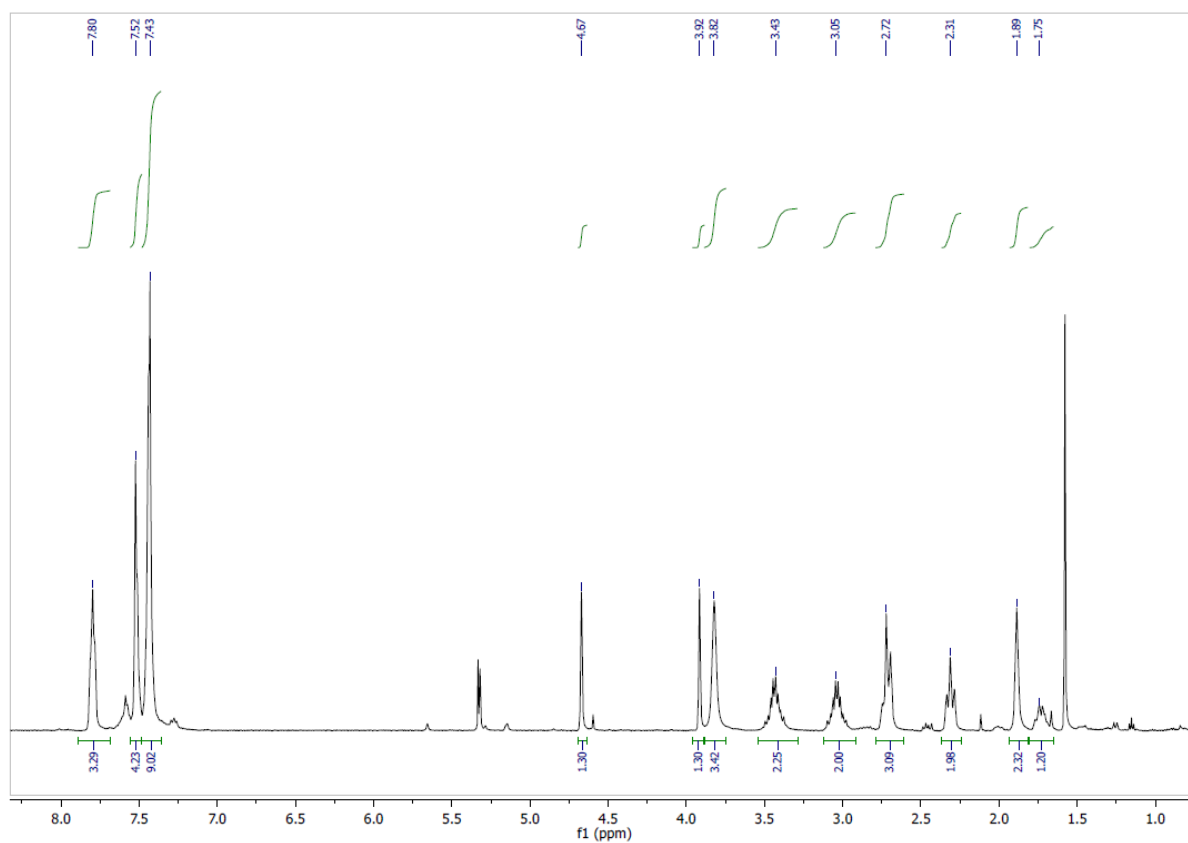

**Figure S17.**  $^1\text{H}$  NMR spectrum of  $[\mathbf{1d}]\text{BF}_4$  in  $\text{CD}_2\text{Cl}_2$ .

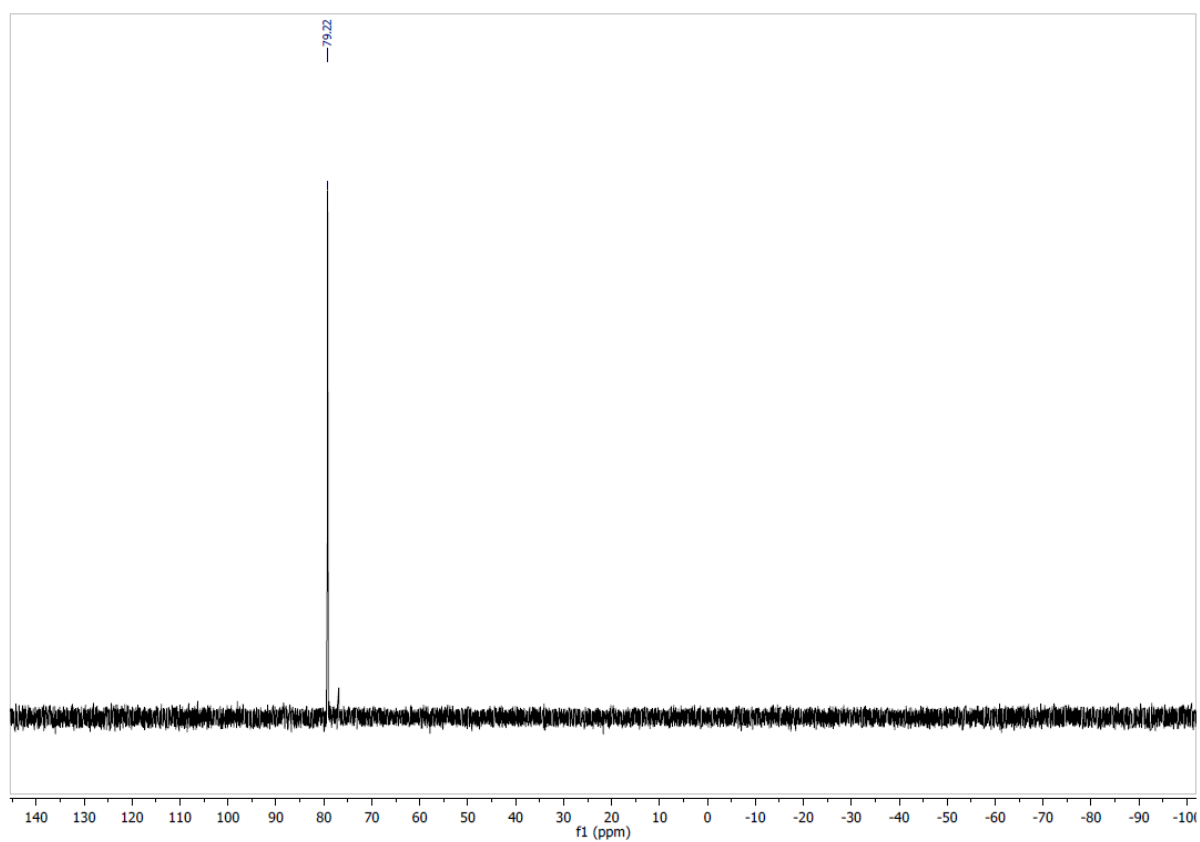

**Figure S18.**  $^{31}\text{P}\{\text{H}\}$  NMR spectrum of  $[\mathbf{1d}]\text{BF}_4$  in  $\text{CD}_2\text{Cl}_2$ .



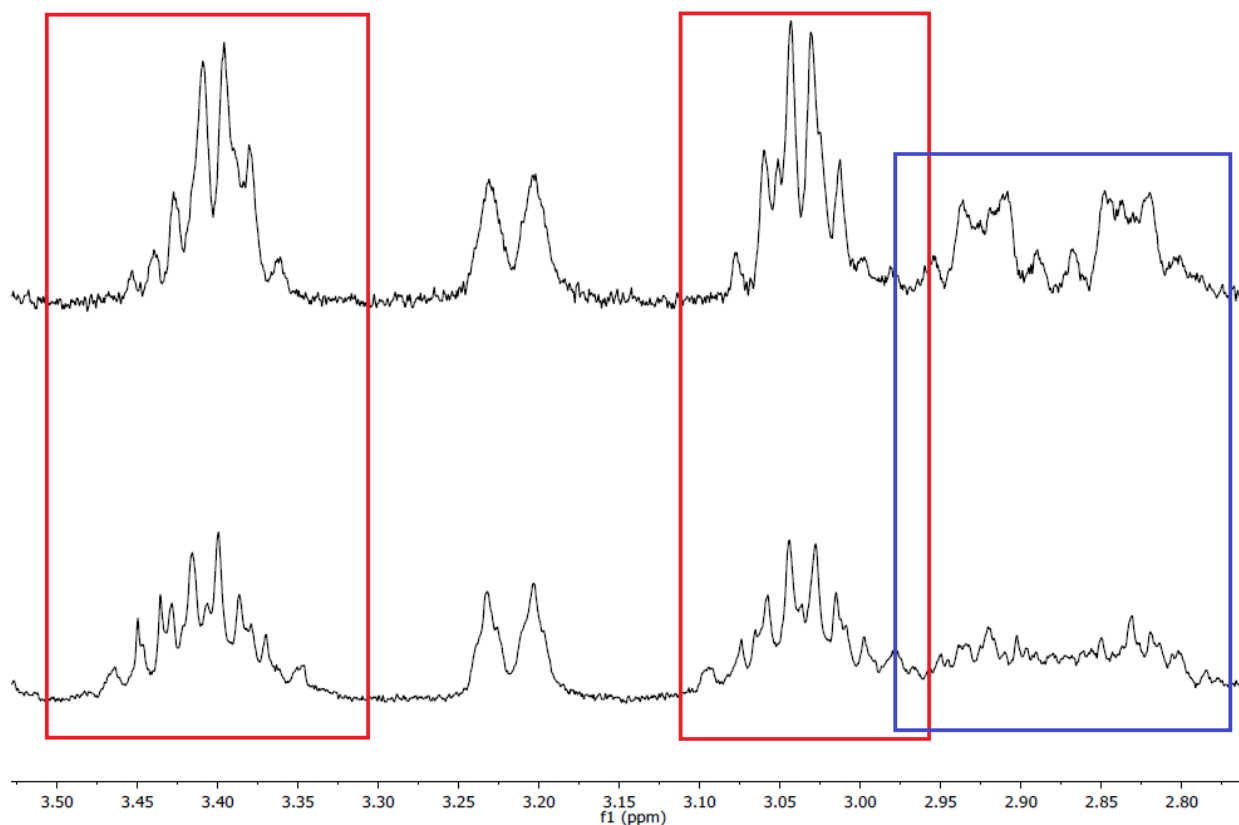

**Figure S19.**  $^1\text{H}$  NMR spectrum of  $[\mathbf{1a}]^0$  after treatment with excess acid, focusing on the ethylene protons of the diphosphine (bottom).  $^1\text{H}\{^{31}\text{P}\}$ -NMR spectrum focusing on the ethylene protons of the diphosphine (top). The red box highlights the resonances assigned to the dibasal isomer and the blue box highlights the resonances assigned to the proposed apical-basal isomer.

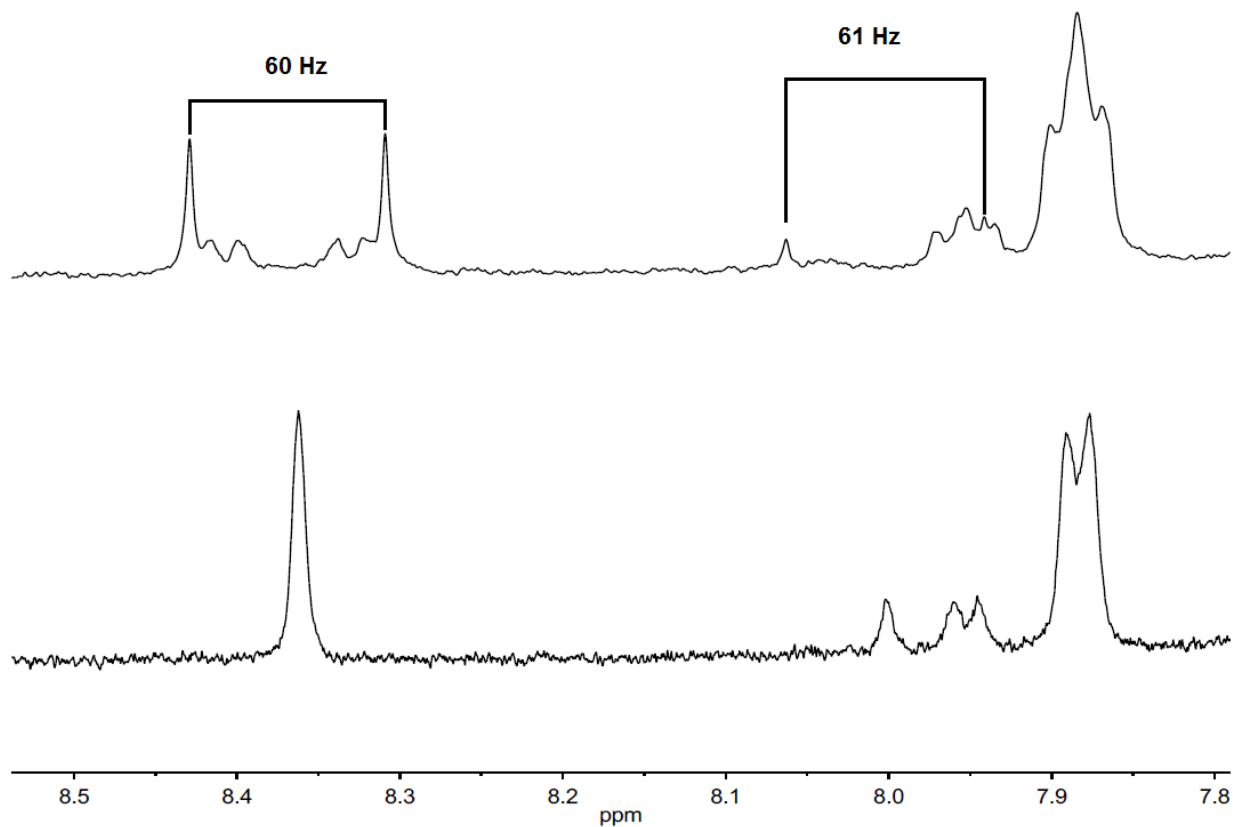

**Figure S20.**  $^1\text{H}$  NMR Spectrum of  $[\mathbf{1b}]^0$  after treatment with excess acid, highlighting the vinylidene protons of the diphosphine (top). The  $^1\text{H}\{^{31}\text{P}\}$  NMR spectrum highlighting the vinylidene protons of the diphosphine (bottom). The dibasal isomer is assigned to the resonance at c.a.  $\delta 8.35$  and the proposed apical-basal isomer is assigned to the resonance at c.a.  $\delta 8.00$ .

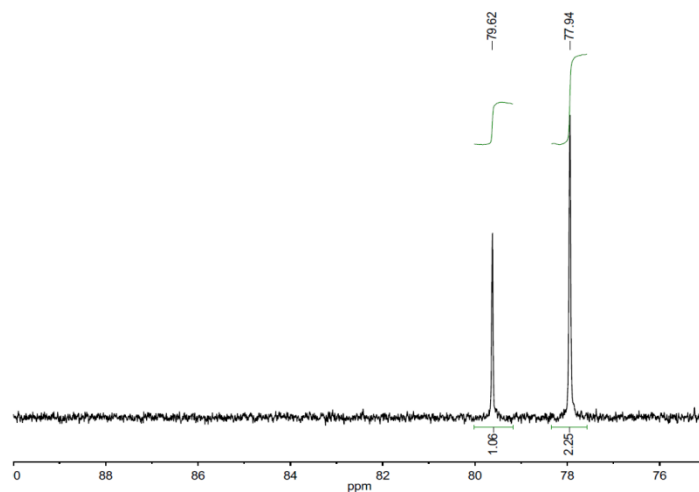

Figure S21.  $^{31}\text{P}\{\text{H}\}$  NMR spectrum of  $[\mathbf{1a}]^0$  after treatment with excess acid.

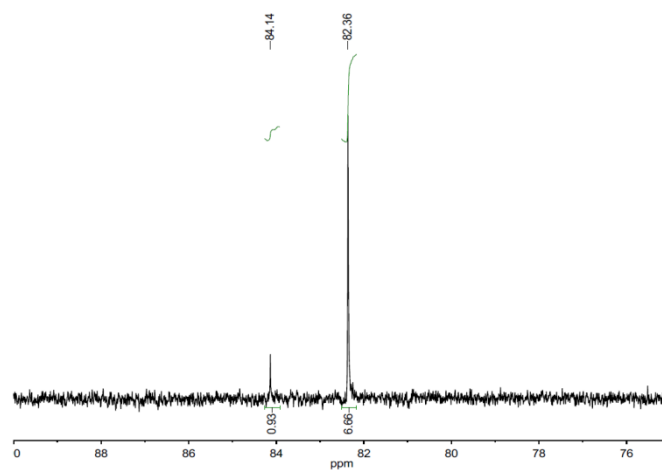

Figure S22.  $^{31}\text{P}\{\text{H}\}$  NMR spectrum of  $[\mathbf{1b}]^0$  after treatment with excess acid.

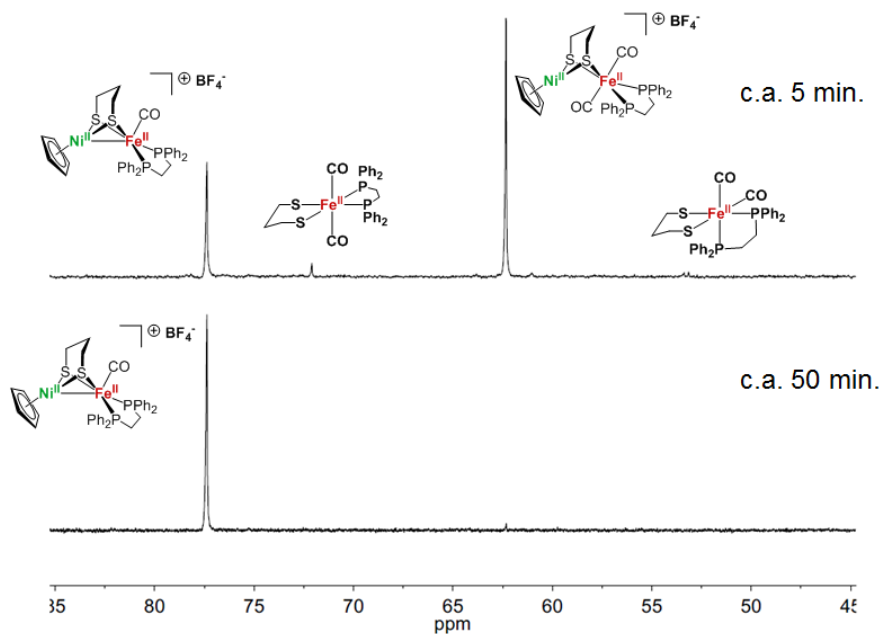

Figure S23.  $^{31}\text{P}\{\text{H}\}$  NMR spectrum of the reaction  $[\text{Cp}_3\text{Ni}_2]\text{BF}_4$  and  $\text{Fe}(\text{pdt})(\text{dppe})(\text{CO})_2$ .

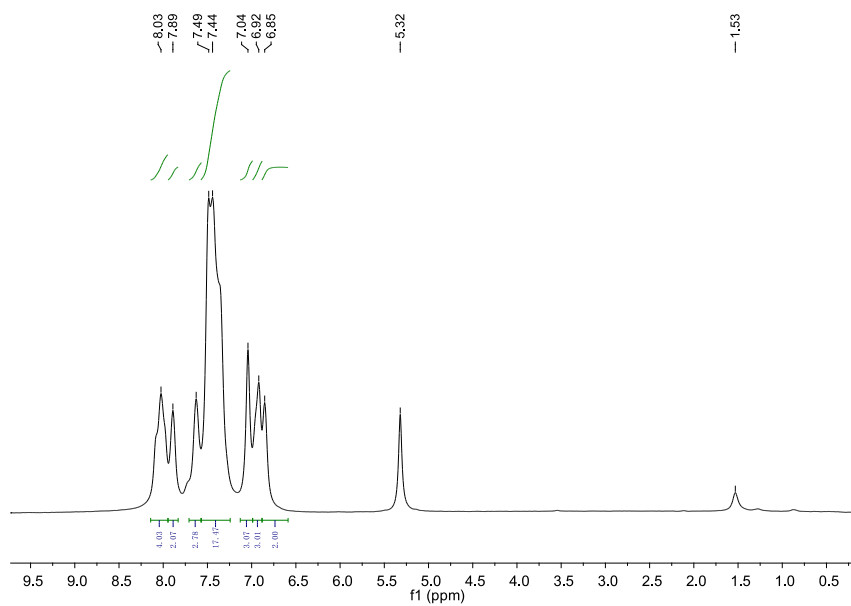

**Figure S24.**  $^1\text{H}$  NMR spectrum of  $\text{Fe}(\text{dppv})(\text{SPh})_2(\text{CO})_2$ .

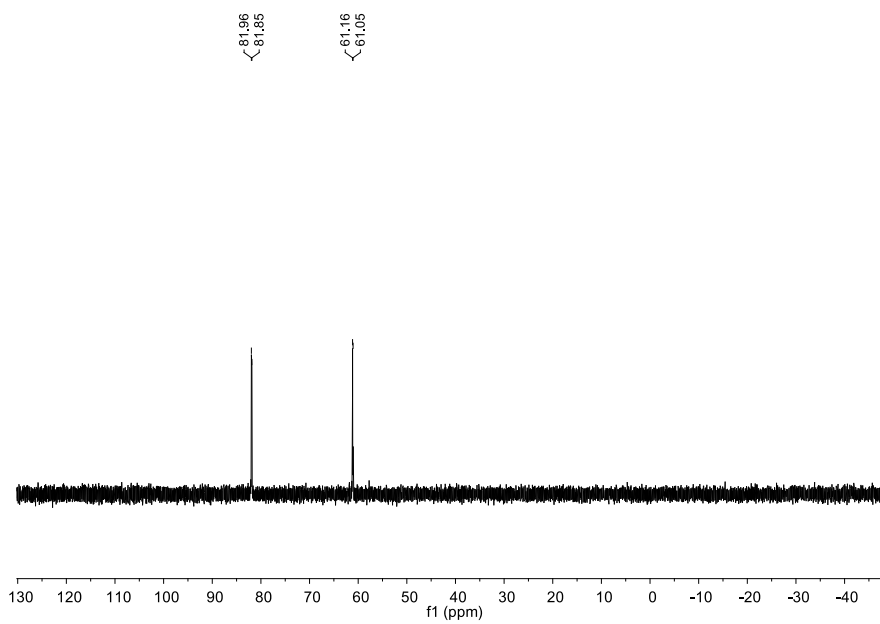

**Figure S25.**  $^{31}\text{P}$  NMR spectrum of  $\text{Fe}(\text{dppv})(\text{SPh})_2(\text{CO})_2$ .

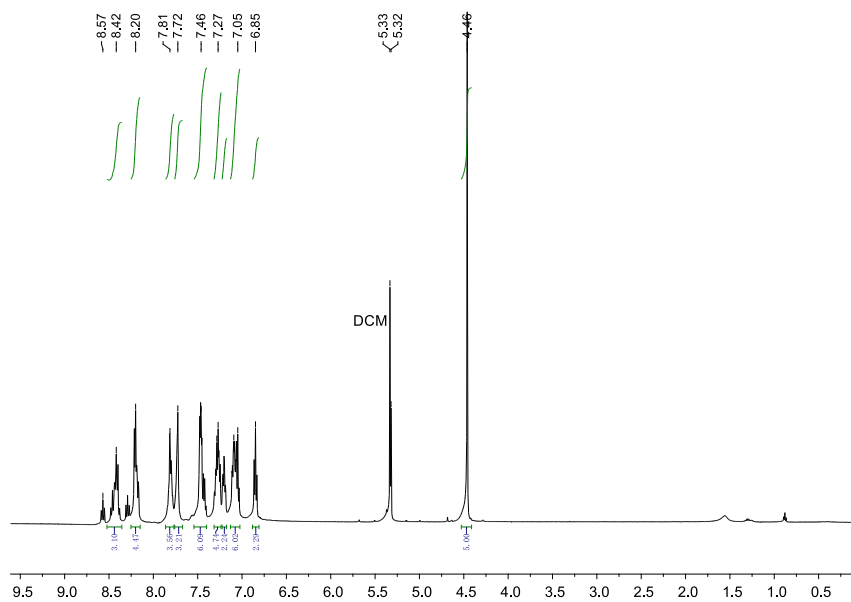

Figure S26.  $^1\text{H}$  NMR spectrum of  $[\mathbf{2bCO}]\text{BF}_4$ .

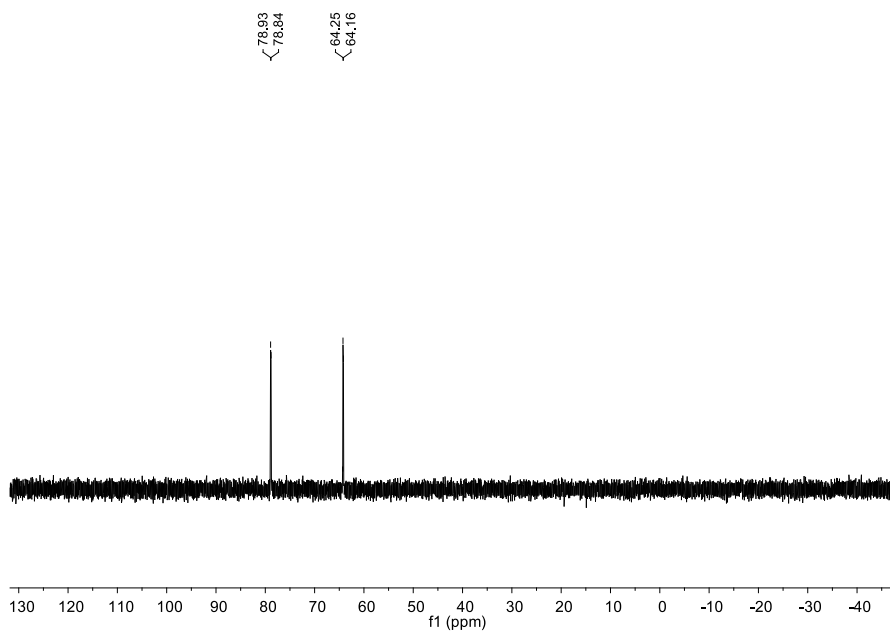

Figure S27.  $^{31}\text{P}$  NMR spectrum of  $[\mathbf{2bCO}]\text{BF}_4$ .

### Cyclic Voltammograms

The following data were recorded according to the procedure outlined in the main text. All voltammograms were recorded in dichloromethane and began at ca.  $-0.5$  V vs  $\text{Fc}^{0/+}$  at  $500$   $\text{mVs}^{-1}$ .  $E_{1/2}$  and  $E_p$  values for each voltammogram are tabulated in Table 2 in the main text.

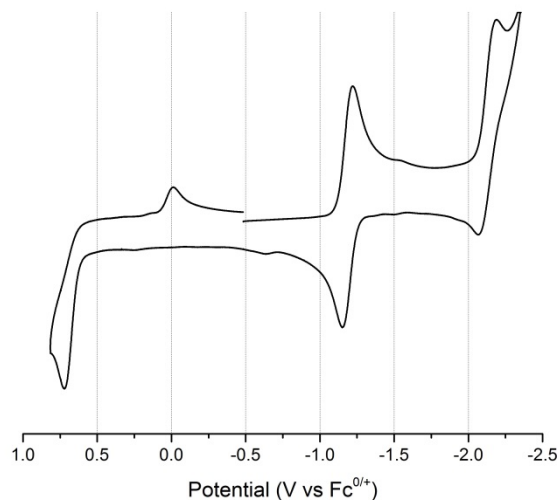

**Figure S28.** Voltammogram of **[1b]** $\text{BF}_4$ .

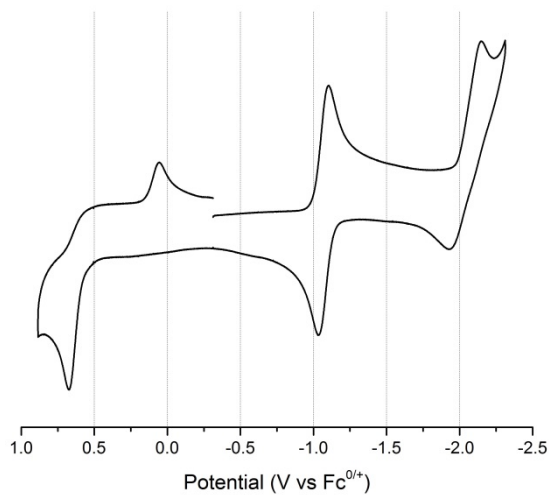

**Figure S29.** Voltammogram of **[1c]** $\text{BF}_4$ .

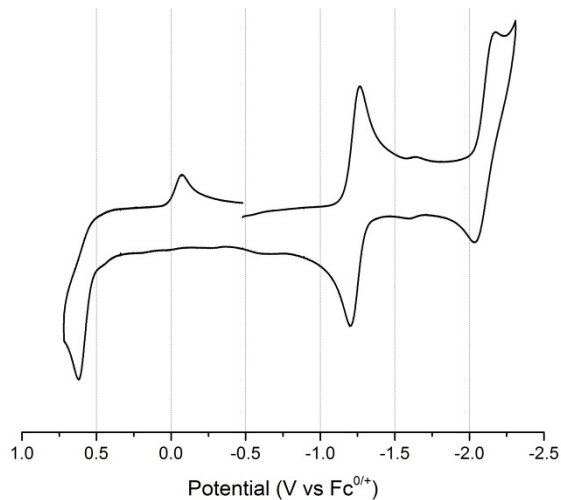

**Figure S30.** Voltammogram of **[1d]** $\text{BF}_4$ .

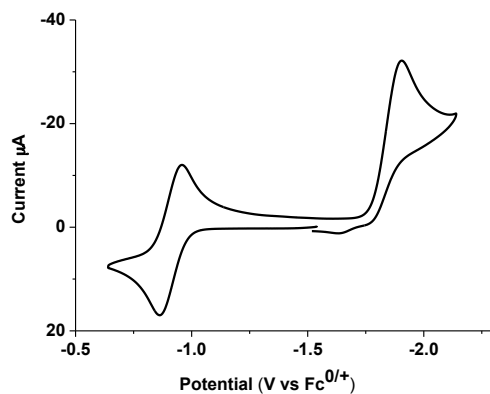

**Figure S31.** Cyclic voltammogram of  $[2b]BF_4$  at  $100 \text{ mV s}^{-1}$ .

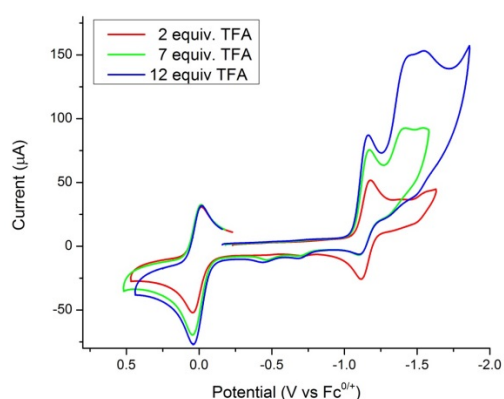

**Figure S32.** Cyclic voltammogram of  $[1a]BF_4$  in  $CH_2Cl_2$  at  $500 \text{ mV s}^{-1}$  with increasing amounts of trifluoroacetic acid showing a catalytic wave centered at the  $[1a]^{+/0}$  couple. The maximum  $i_c/i_p$  observed in the acid independent region is approximately 2, yielding a rate of  $3.88 \text{ s}^{-1}$ .<sup>1</sup> Glassy carbon is known to catalyze proton reduction of trifluoroacetic acid at  $-1.81 \text{ V}$  under these conditions.<sup>2</sup>

### IR Spectra

The following spectra were recorded using the equipment described in the main text. All spectra were recorded as solutions in dichloromethane.

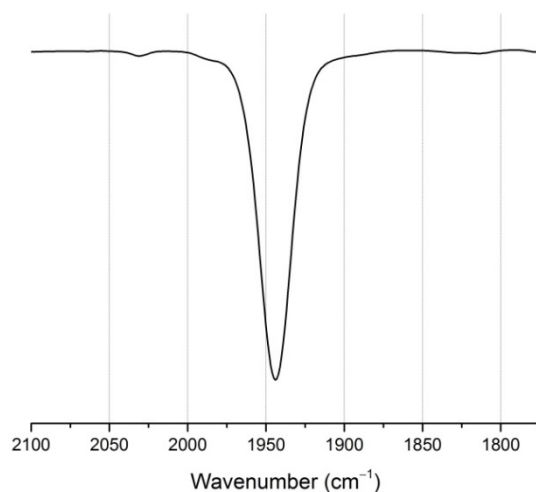

**Figure S33.** IR spectrum of  $[1a]BF_4$ .

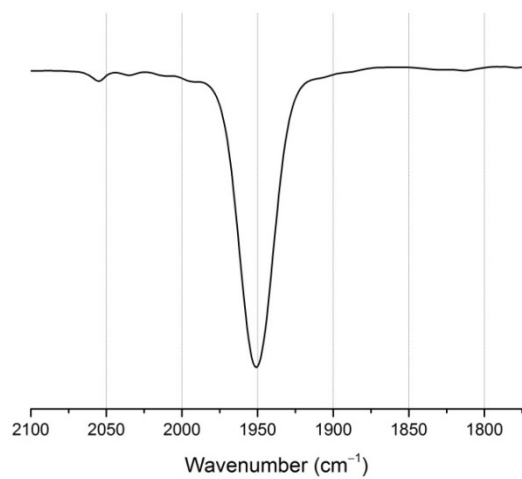

**Figure S34.** IR spectrum of [1b]BF<sub>4</sub>

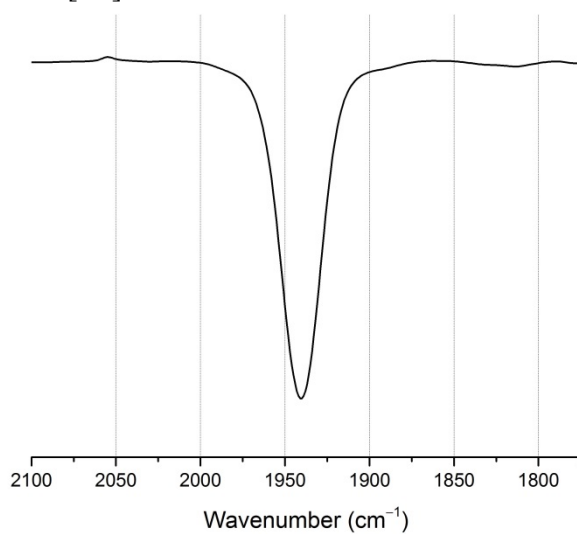

**Figure S35.** IR spectrum of [1c]BF<sub>4</sub>

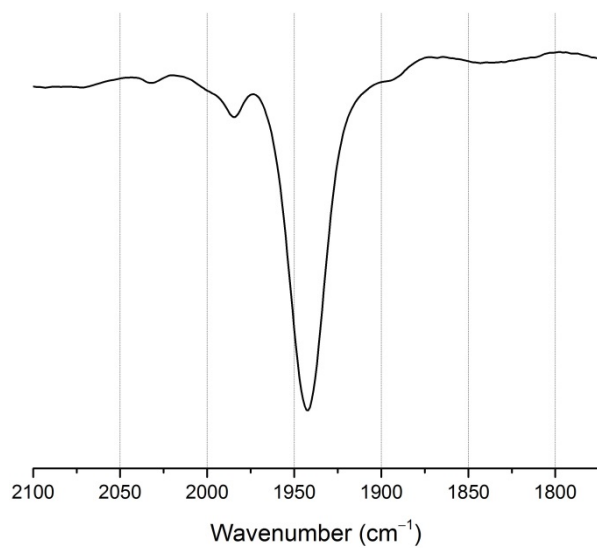

**Figure S36.** IR spectrum of [1d]BF<sub>4</sub>



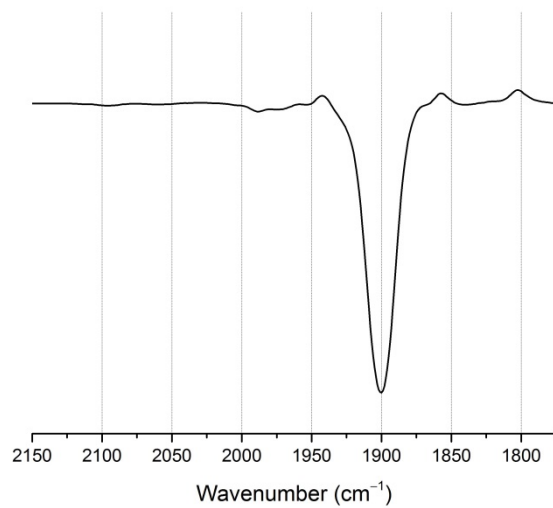

**Figure S37.** IR spectrum of [1a]<sup>0</sup>.

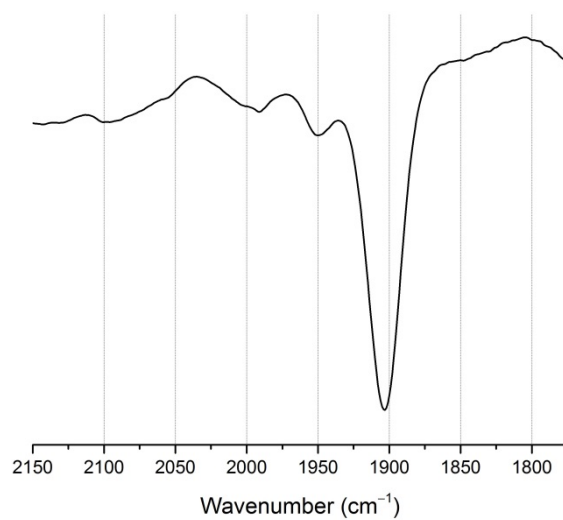

**Figure S38.** IR spectrum of [1b]<sup>0</sup>.

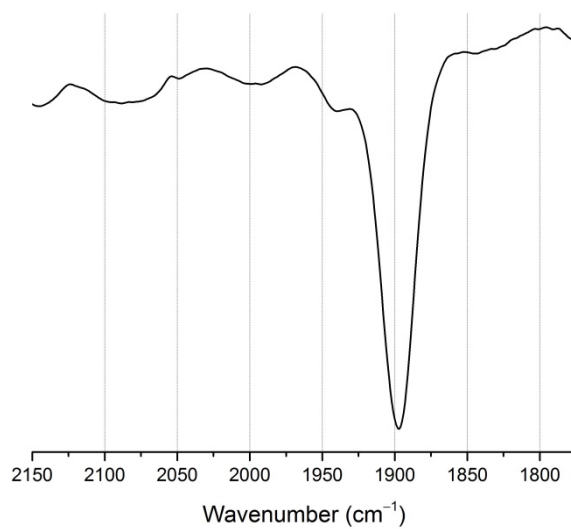

**Figure S39.** IR spectrum of [1c]<sup>0</sup>.

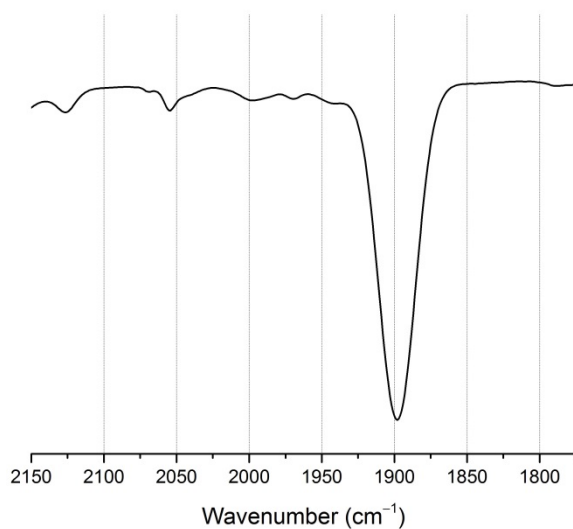

**Figure S40.** IR spectrum of [1d]<sup>0</sup>.

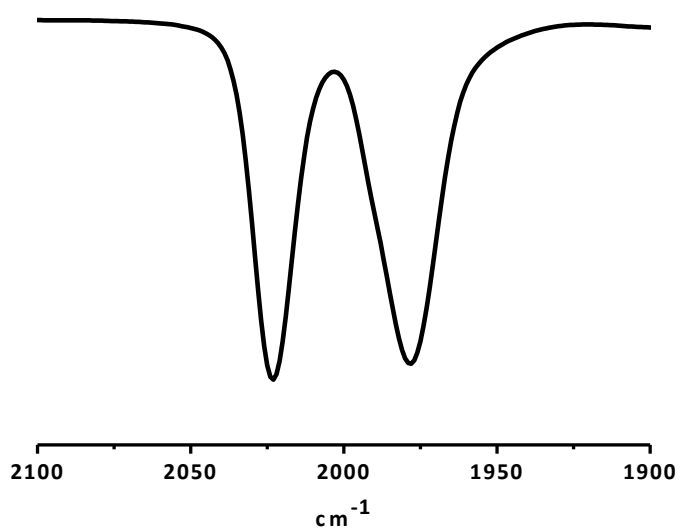

**Figure S41.** IR spectrum of Fe(dppv)(SPh)<sub>2</sub>(CO)<sub>2</sub>

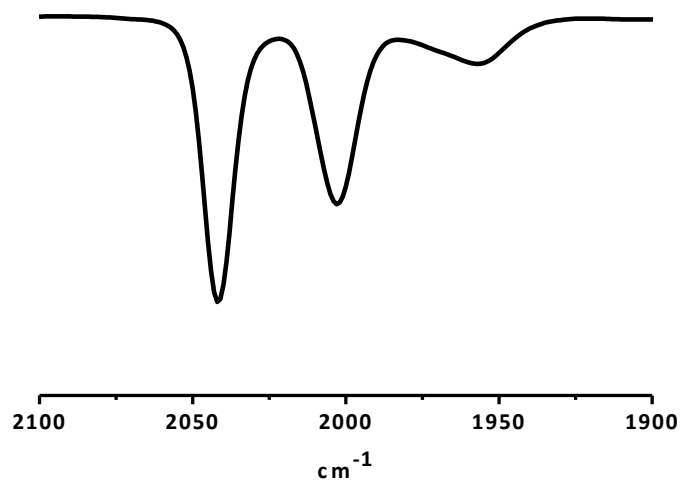

**Figure S42.** IR spectrum of [2bCO]BF<sub>4</sub>.

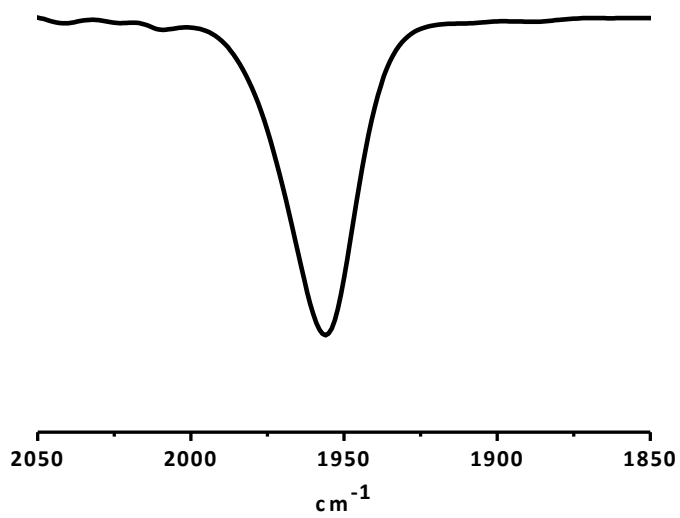

**Figure S43.** IR spectrum of [2b]BF<sub>4</sub>.

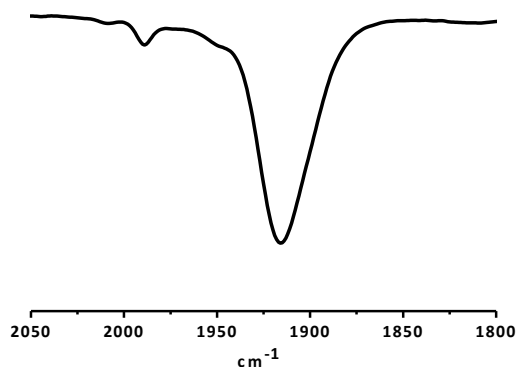

Figure S44. IR spectrum of  $[2b]^0$ .

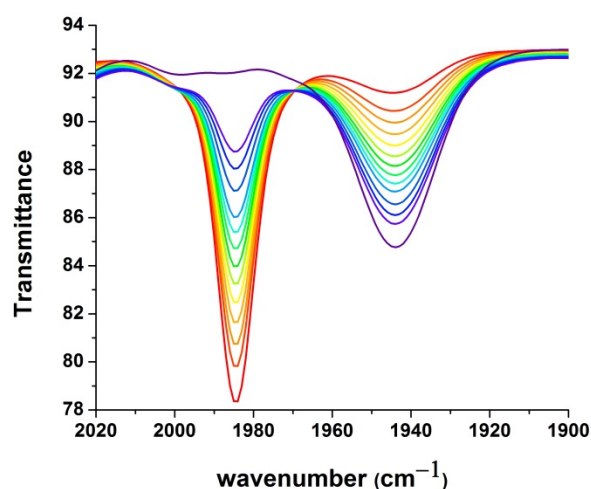

Figure S45. IR spectra from c.a. 5 minutes (red) to c.a. 50 minutes (purple) of the reaction of  $[Cp_3Ni_2]BF_4$  and  $Fe(pdt)(dppe)(CO)_2$ . The product band ( $[1a]BF_4$ ) occurs at  $1943\text{ cm}^{-1}$ . Intervals for timepoint 1 to 10 are 1 minute, 11 to 13 2 minutes, and the final time point is after 50 minutes.

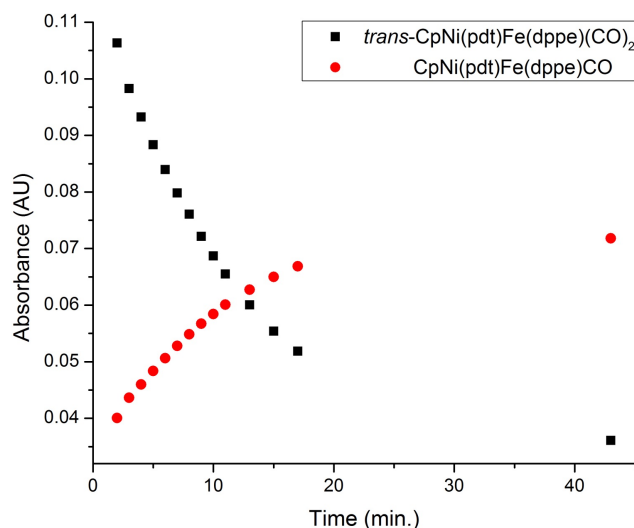

Figure S46. IR absorbance versus time plot of the CO bands observed during the reaction of  $[Cp_3Ni_2]BF_4$  and  $Fe(pdt)(dppe)(CO)_2$ . The half-life of the  $trans-[CpNi(pdt)Fe(dppe)(CO)_2]$  product is ca. 480 sec., equating to an activation barrier of 21 kcal/mol under the experimental conditions.

### CW X-Band EPR Spectra

EPR spectra were recorded according to the conditions described in the figure and using the instrumentation described in the main text.

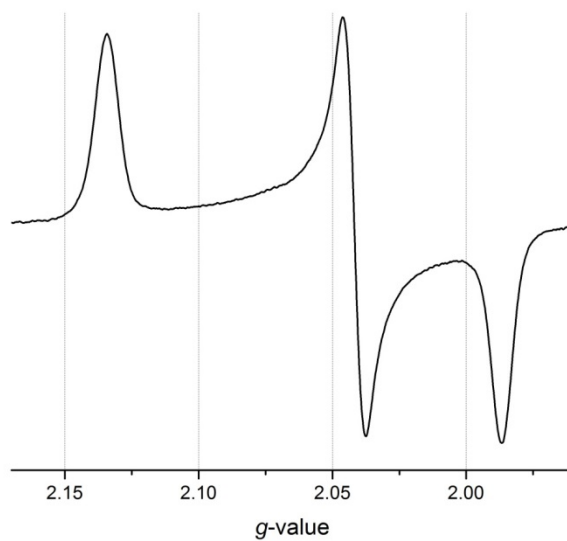

**Figure S47.** X-band CW-EPR Spectrum of  $[1b]^0$  as a  $\sim 1$  mM frozen solution dichloromethane-toluene solution at 110K.

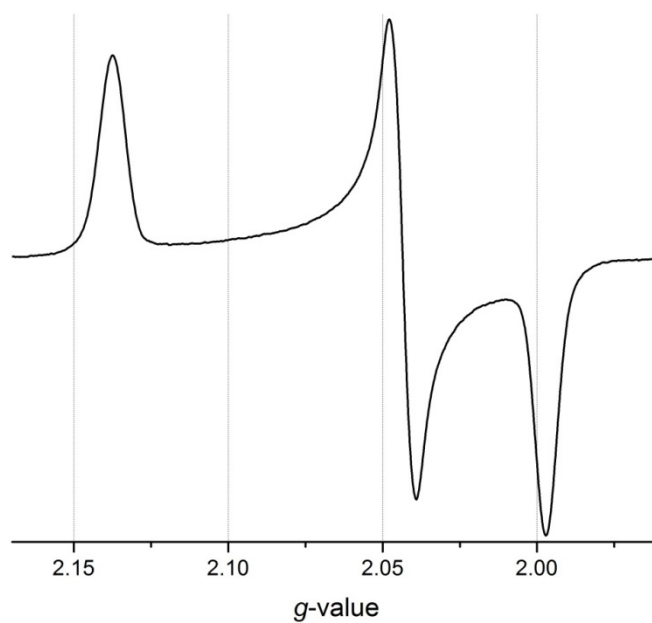

**Figure S48.** X-band CW-EPR spectrum of  $[1c]^0$  as a  $\sim 1$  mM frozen solution dichloromethane-toluene solution at 110K.

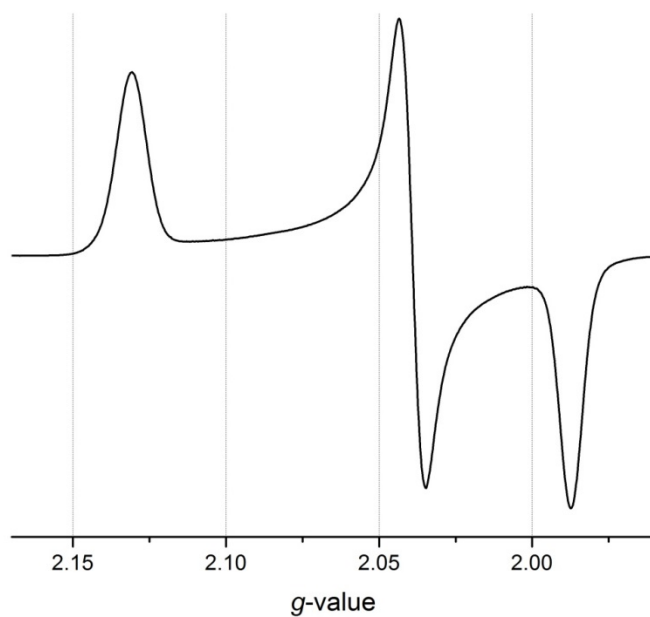

**Figure S49.** X-band CW-EPR spectrum of  $[1d]^0$  as a  $\sim 1$  mM frozen solution dichloromethane-toluene solution at 110K.

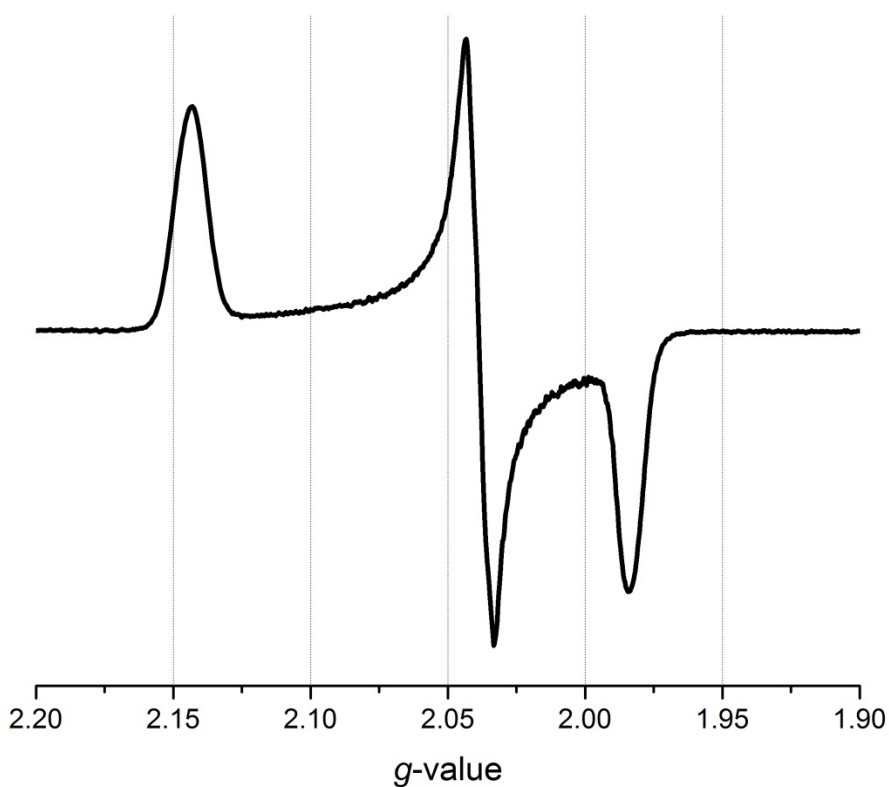

**Figure S50.** X-band CW-EPR spectrum of  $[2b]^0$  as a  $\sim 1$  mM frozen solution dichloromethane-toluene solution at 110K.

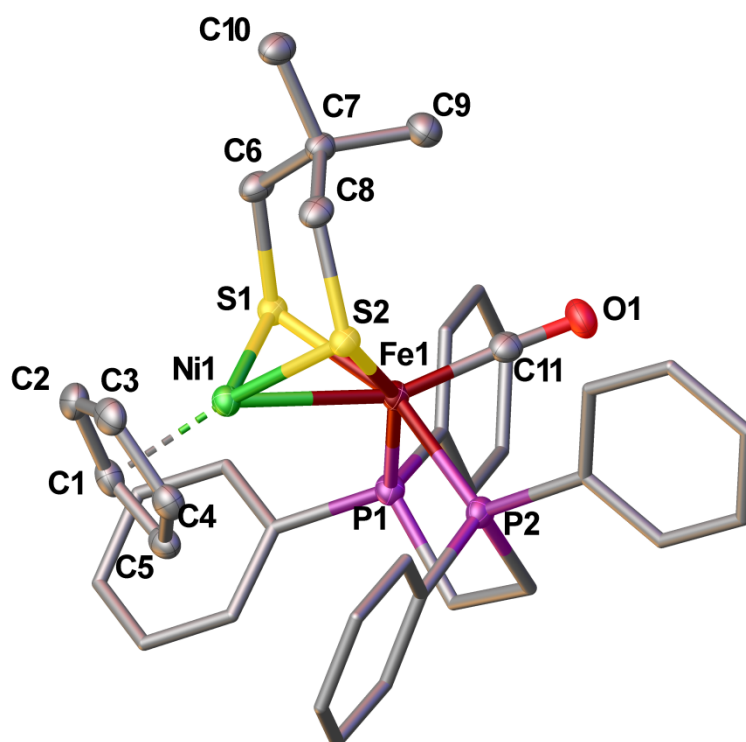

**Figure S51.** Solid-state structure of  $[1c]BF_4$  shown at the 35% probability level with hydrogen atoms and counterion omitted for clarity. Selected bond distances ( $\text{\AA}$ ): Ni1-Fe1, 2.4825(9); Ni1-Cent, 1.723(5); Ni1-S<sub>avg</sub>, 2.1762(9); Fe1-S<sub>avg</sub>, 2.2359(9); Fe1-C11, 1.744(3); C11-O1, 1.160(3).

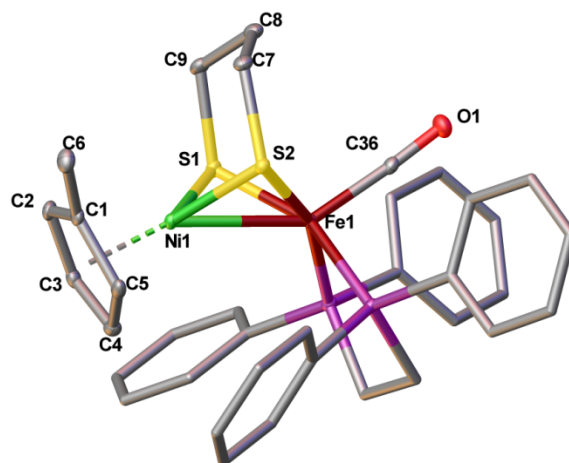

**Figure S52.** Solid-state structure of  $[1d]BF_4$  shown at the 35% probability level with hydrogen atoms and counterion omitted for clarity. Selected bond distances ( $\text{\AA}$ ): Ni1-Fe1, 2.5214(6); Ni1-Cent, 1.724(4); Ni1-S<sub>avg</sub>, 2.172(1); Fe1-S<sub>avg</sub>, 2.219(1); Fe1-C36, 1.748(3); C36-O1, 1.151(4).

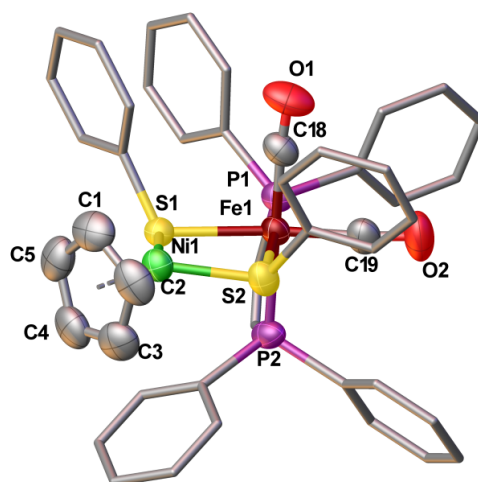

**Figure S53.** Solid-state structure of  $[\mathbf{2bCO}]BF_4$  shown at the 35% probability level with hydrogen atoms, counterion, and dichloromethane solvate omitted for clarity. The diffraction data were collected at room temperature (see CIF for more information). Selected bond distances ( $\text{\AA}$ ): Ni1-Fe1, 3.308(1); Ni1-cent, 1.754(9); Ni1-S<sub>avg</sub>, 2.180(1); Fe1-S<sub>avg</sub>, 2.353(1); Fe1-C18, 1.795(4); Fe1-C19, 1.796(4); C18-O1, 1.133(5); C19-O2, 1.129(5). Fe1-P1, 2.252(1); Fe1-P2, 2.291(1).

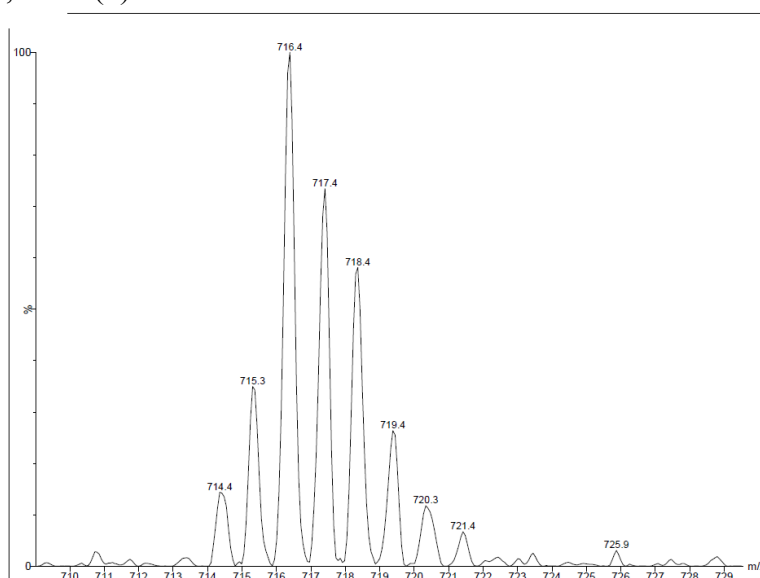

**Figure S54.** Mass spectrum of  $[(C_5D_5)Ni(pdt)Fe(CO)(dppe)]BF_4$ .  $^2H$  incorporation  $\geq 92\%$ .



**Table S1.** Calculated Reduction Potentials<sup>a</sup> for [1a-d]<sup>+0</sup> Using Different Functionals<sup>b</sup>

|                    | $E_{1/2}$<br>(Ni <sup>II</sup> Fe <sup>II</sup> /Ni <sup>I</sup> Fe <sup>II</sup> ) |                      | $E^{\circ c}$<br>(Ni <sup>II</sup> Fe <sup>II</sup> /Ni <sup>I</sup> Fe <sup>II</sup> ) |                    |                    |                    |                    |
|--------------------|-------------------------------------------------------------------------------------|----------------------|-----------------------------------------------------------------------------------------|--------------------|--------------------|--------------------|--------------------|
|                    | Expt                                                                                | BP86                 | BP86 <sup>d</sup>                                                                       | BP86-D2            | B3P86              | M06-L              | $\omega$ B97X-D    |
| [1a] <sup>+0</sup> | -1.16                                                                               | -1.16 <sup>e,f</sup> | -1.16 <sup>e</sup>                                                                      | -1.16 <sup>e</sup> | -1.16 <sup>e</sup> | -1.16 <sup>e</sup> | -1.16 <sup>e</sup> |
|                    |                                                                                     | -1.14 <sup>g</sup>   | -1.02                                                                                   | -1.02              | -1.14              | -1.10              | -1.06              |
| [1b] <sup>+0</sup> | -1.15                                                                               | -1.12                | -1.15                                                                                   | -1.11              | -1.12              | -1.14              | -1.05              |
|                    |                                                                                     | -1.02                | -1.09                                                                                   | -1.06              | -1.05              | -1.07              | -0.94              |
| [1c] <sup>+0</sup> | -1.09                                                                               | -1.16                | -1.11                                                                                   | -1.09              | -1.15              | -1.17              | -1.05              |
|                    |                                                                                     | -1.09                | -1.19                                                                                   | -1.08              | -1.08              | -1.08              | -0.97              |
| [1d] <sup>+0</sup> | -1.21                                                                               | -1.23                | -1.20                                                                                   | -1.26              | -1.21              | -1.23              | -1.14              |
|                    |                                                                                     | -1.20                | -1.21                                                                                   | -1.13              | -1.15              | -1.15              | -1.03              |

<sup>a</sup>Units of V vs. Fc<sup>0/+</sup> in CH<sub>2</sub>Cl<sub>2</sub>. <sup>b</sup>Unless stated otherwise, the geometries were optimized in the gas phase using the SDD pseudopotential and associated basis set for Ni and Fe and the 6-31G\* basis set for all other atoms, and the solvation free energies were calculated in CH<sub>2</sub>Cl<sub>2</sub> using C-PCM. <sup>c</sup>For each complex, the first calculated potential corresponds to the species in which the pdt is oriented toward the Fe, and the second calculated potential corresponds to the species in which the pdt is oriented toward the Ni. <sup>d</sup>The geometries were optimized in CH<sub>2</sub>Cl<sub>2</sub> solvent using C-PCM. <sup>e</sup>The [1a]<sup>+0</sup> couple was used as the reference reaction so the experimental and calculated values agree by construction. <sup>f</sup>Reducing the Fe center has a calculated potential of  $E^{\circ} = -1.35$  V vs. Fc<sup>0/+</sup> in CH<sub>2</sub>Cl<sub>2</sub>. <sup>g</sup>Reducing the Fe center has a calculated potential of  $E^{\circ} = -1.31$  V vs. Fc<sup>0/+</sup> in CH<sub>2</sub>Cl<sub>2</sub>.

**Table S2.** Experimental and Calculated Reduction Potentials<sup>a</sup> for [1a-d]<sup>+0</sup> Using BP86 Functional Assuming the pdt Ring Flips Concurrently with Reduction

|                   | $E_{p,ox}$<br>(Ni <sup>II</sup> Fe <sup>II</sup> /Ni <sup>III</sup> Fe <sup>II</sup> ) | Calc <sup>b,c,d</sup> | $E_{1/2}$<br>(Ni <sup>II</sup> Fe <sup>II</sup> /Ni <sup>I</sup> Fe <sup>II</sup> ) | Calc <sup>b,c,d</sup> | $E_{p,red}^e$<br>(Ni <sup>I</sup> Fe <sup>II</sup> /Ni <sup>I</sup> Fe <sup>I</sup> ) | Calc <sup>b,c,d,e</sup> |
|-------------------|----------------------------------------------------------------------------------------|-----------------------|-------------------------------------------------------------------------------------|-----------------------|---------------------------------------------------------------------------------------|-------------------------|
| [1a] <sup>+</sup> | 0.70                                                                                   | 0.70                  | -1.16                                                                               | -1.16                 | -2.15                                                                                 | -2.15                   |
| [1b] <sup>+</sup> | 0.72                                                                                   | 0.74                  | -1.15                                                                               | -1.08                 | -2.18                                                                                 | -2.08                   |
| [1c] <sup>+</sup> | 0.67                                                                                   | 0.67                  | -1.09                                                                               | -1.23                 | -2.15                                                                                 | -2.15                   |
| [1d] <sup>+</sup> | 0.62                                                                                   | 0.66                  | -1.21                                                                               | -1.21                 | -2.17                                                                                 | -2.24                   |

<sup>a</sup>Units of V vs. Fc<sup>0/+</sup> in CH<sub>2</sub>Cl<sub>2</sub>. <sup>b</sup>All geometries were optimized in the gas phase using the SDD pseudopotential and associated basis set for Ni and Fe and the 6-31G\* basis set for all other atoms. Solvation free energies were calculated in CH<sub>2</sub>Cl<sub>2</sub> using C-PCM. <sup>c</sup>For the calculated potentials, the pdt ring is oriented toward the Fe center before reduction (oxidation) and toward the Ni center after reduction (oxidation). <sup>d</sup>The [1a]<sup>+0</sup> couple was used as the reference reaction so the experimental and calculated values agree by construction. <sup>e</sup>This wave is assigned to the Ni<sup>I</sup>Fe<sup>II</sup>/Ni<sup>I</sup>Fe<sup>I</sup> couple, where the Ni<sup>I</sup>Fe<sup>I</sup> state is an open-shell singlet.

**Table S3.** Calculated  $\Delta\tilde{\nu}_{\text{CO}}$ <sup>a</sup> for [1a-d]<sup>+0</sup> Using Different Functionals<sup>b</sup>

|                    | Expt | Calc <sup>c</sup> |                   |         |         |         |                 |
|--------------------|------|-------------------|-------------------|---------|---------|---------|-----------------|
|                    |      | BP86              | BP86 <sup>d</sup> | BP86-D2 | B3P86   | M06-L   | $\omega$ B97X-D |
| [1a] <sup>+0</sup> | -42  | -47/-45           | -33/-31           | -39/-32 | -50/-63 | -39/-36 | -71/-68         |
| [1b] <sup>+0</sup> | -48  | -42/-43           | -33/-32           | -40/-36 | -51/-52 | -40/-39 | -77/-81         |
| [1c] <sup>+0</sup> | -43  | -39/-37           | -34/-34           | -38/-35 | -51/-50 | -43/-41 | -77/-73         |
| [1d] <sup>+0</sup> | -45  | -47/-45           | -33/-32           | -40/-24 | -46/-47 | -42/-41 | -80/-68         |

<sup>a</sup>Units of cm<sup>-1</sup>. <sup>b</sup>Unless stated otherwise, the geometries were optimized in the gas phase using the SDD pseudopotential and associated basis set for Ni and Fe and the 6-31G\* basis set for all other atoms. <sup>c</sup>For each complex, the first calculated frequency corresponds to the species in which the pdt is oriented toward the Fe center, and the second calculated frequency corresponds to the species in which the pdt is oriented toward the Ni center. <sup>d</sup>The geometries were optimized in CH<sub>2</sub>Cl<sub>2</sub> solvent using C-PCM.

**Table S4.** Selected Bond Lengths (Å) and Angles (°) for [1a]<sup>+</sup> Using Different Functionals<sup>a</sup>

|                                                                                       | Expt  | Calc  |                   |         |       |       |                 |
|---------------------------------------------------------------------------------------|-------|-------|-------------------|---------|-------|-------|-----------------|
|                                                                                       |       | BP86  | BP86 <sup>b</sup> | BP86-D2 | B3P86 | M06-L | $\omega$ B97X-D |
| Ni-Fe                                                                                 | 2.51  | 2.57  | 2.55              | 2.51    | 2.57  | 2.53  | 2.51            |
| Ni-Cp <sub>centroid</sub>                                                             | 1.72  | 1.75  | 1.74              | 1.72    | 1.74  | 1.71  | 1.72            |
| Ni-S <sup>c</sup>                                                                     | 2.16  | 2.19  | 2.19              | 2.18    | 2.18  | 2.20  | 2.16            |
| Fe-S <sup>c</sup>                                                                     | 2.22  | 2.26  | 2.26              | 2.25    | 2.25  | 2.27  | 2.22            |
| Fe-P <sup>c</sup>                                                                     | 2.23  | 2.27  | 2.26              | 2.22    | 2.27  | 2.25  | 2.23            |
| Fe-C                                                                                  | 1.76  | 1.73  | 1.72              | 1.73    | 1.73  | 1.73  | 1.76            |
| S <sub>1</sub> -Ni-S <sub>2</sub>                                                     | 90.3  | 89.8  | 89.8              | 91.5    | 86.6  | 90.8  | 90.3            |
| S <sub>1</sub> -Fe-S <sub>2</sub>                                                     | 87.4  | 86.3  | 86.5              | 87.9    | 90.0  | 87.1  | 87.4            |
| P <sub>1</sub> -Fe-P <sub>2</sub>                                                     | 86.7  | 87.2  | 86.8              | 86.9    | 87.0  | 86.3  | 86.7            |
| S <sub>1</sub> -Ni-S <sub>2</sub> /<br>S <sub>1</sub> -Fe-S <sub>2</sub> <sup>d</sup> | 106.8 | 106.7 | 105.6             | 105.8   | 107.6 | 104.5 | 106.8           |

<sup>a</sup>Unless stated otherwise, the geometries were optimized in the gas phase using the SDD pseudopotential and associated basis set for Ni and Fe and the 6-31G\* basis set for all other atoms. <sup>b</sup>The geometries were optimized in CH<sub>2</sub>Cl<sub>2</sub> solvent using C-PCM. <sup>c</sup>Bond distance represents an average value. <sup>d</sup>Defined as the dihedral angle between the planes generated by the groups of three atoms listed.

**Table S5.** Selected Bond Lengths (Å) and Angles (°) for [1a]<sup>0</sup> Using Different Functionals<sup>a</sup>

|                                                                                       | Expt | Calc  |                   |         |       |       |         |
|---------------------------------------------------------------------------------------|------|-------|-------------------|---------|-------|-------|---------|
|                                                                                       |      | BP86  | BP86 <sup>b</sup> | BP86-D2 | B3P86 | M06-L | ωB97X-D |
| Ni-Fe                                                                                 | 2.46 | 2.53  | 2.50              | 2.41    | 2.58  | 2.45  | 2.50    |
| Ni-Cp <sub>centroid</sub>                                                             | 1.80 | 1.83  | 1.83              | 1.78    | 1.87  | 1.79  | 1.84    |
| Ni-S <sup>c</sup>                                                                     | 2.28 | 2.29  | 2.30              | 2.28    | 2.30  | 2.33  | 2.33    |
| Fe-S <sup>c</sup>                                                                     | 2.25 | 2.28  | 2.27              | 2.28    | 2.29  | 2.30  | 2.32    |
| Fe-P <sup>c</sup>                                                                     | 2.24 | 2.25  | 2.26              | 2.21    | 2.24  | 2.23  | 2.27    |
| Fe-C                                                                                  | 1.75 | 1.73  | 1.72              | 1.73    | 1.75  | 1.74  | 1.78    |
| S <sub>1</sub> -Ni-S <sub>2</sub>                                                     | 88.2 | 88.5  | 87.5              | 89.7    | 88.2  | 87.9  | 88.2    |
| S <sub>1</sub> -Fe-S <sub>2</sub>                                                     | 88.9 | 89.0  | 88.8              | 89.8    | 88.9  | 89.5  | 88.9    |
| P <sub>1</sub> -Fe-P <sub>2</sub>                                                     | 87.0 | 86.3  | 86.1              | 86.5    | 87.0  | 86.4  | 86.2    |
| S <sub>1</sub> -Ni-S <sub>2</sub> /<br>S <sub>1</sub> -Fe-S <sub>2</sub> <sup>d</sup> | 98.2 | 101.5 | 99.1              | 96.3    | 103.5 | 95.4  | 97.3    |

<sup>a</sup>Unless stated otherwise, the geometries were optimized in the gas phase using the SDD pseudopotential and associated basis set for Ni and Fe and the 6-31G\* basis set for all other atoms. <sup>b</sup>The geometries were optimized in CH<sub>2</sub>Cl<sub>2</sub> solvent using C-PCM. <sup>c</sup>Bond distance represents an average value. <sup>d</sup>Defined as the dihedral angle between the planes generated by the groups of three atoms listed.

**Table S6.** Selected Bond Lengths (Å) and Angles (°) for [1c]<sup>+</sup> Using Different Functionals<sup>a</sup>

|                                                                                       | Expt  | Calc  |                   |         |       |       |         |
|---------------------------------------------------------------------------------------|-------|-------|-------------------|---------|-------|-------|---------|
|                                                                                       |       | BP86  | BP86 <sup>b</sup> | BP86-D2 | B3P86 | M06-L | ωB97X-D |
| Ni-Fe                                                                                 | 2.48  | 2.54  | 2.52              | 2.49    | 2.53  | 2.49  | 2.53    |
| Ni-Cp' <sub>centroid</sub>                                                            | 1.72  | 1.75  | 1.74              | 1.72    | 1.74  | 1.71  | 1.73    |
| Ni-S <sup>c</sup>                                                                     | 2.18  | 2.20  | 2.20              | 2.19    | 2.18  | 2.21  | 2.20    |
| Fe-S <sup>c</sup>                                                                     | 2.24  | 2.40  | 2.26              | 2.25    | 2.25  | 2.28  | 2.26    |
| Fe-P <sup>c</sup>                                                                     | 2.23  | 2.27  | 2.27              | 2.22    | 2.27  | 2.24  | 2.28    |
| Fe-C                                                                                  | 1.74  | 1.73  | 1.72              | 1.73    | 1.73  | 1.73  | 1.76    |
| S <sub>1</sub> -Ni-S <sub>2</sub>                                                     | 88.1  | 88.1  | 88.1              | 90.0    | 88.6  | 89.4  | 89.3    |
| S <sub>1</sub> -Fe-S <sub>2</sub>                                                     | 85.2  | 85.1  | 85.1              | 86.5    | 85.4  | 86.0  | 86.2    |
| P <sub>1</sub> -Fe-P <sub>2</sub>                                                     | 87.5  | 86.7  | 86.7              | 86.8    | 86.8  | 86.5  | 85.9    |
| S <sub>1</sub> -Ni-S <sub>2</sub> /<br>S <sub>1</sub> -Fe-S <sub>2</sub> <sup>d</sup> | 101.3 | 101.9 | 101.9             | 102.7   | 103.7 | 100.9 | 103.9   |

<sup>a</sup>Unless stated otherwise, the geometries were optimized in the gas phase using the SDD pseudopotential and associated basis set for Ni and Fe and the 6-31G\* basis set for all other atoms. <sup>b</sup>The geometries were optimized in CH<sub>2</sub>Cl<sub>2</sub> solvent using C-PCM. <sup>c</sup>Bond distance represents an average value. <sup>d</sup>Defined as the dihedral angle between the planes generated by the groups of three atoms listed.

**Table S7.** Selected Bond Lengths (Å) and Angles (°) for [1d]<sup>+</sup> Using Different Functionals<sup>a</sup>

|                                                                                       | Expt  | Calc  |                   |         |       |       |         |
|---------------------------------------------------------------------------------------|-------|-------|-------------------|---------|-------|-------|---------|
|                                                                                       |       | BP86  | BP86 <sup>b</sup> | BP86-D2 | B3P86 | M06-L | ωB97X-D |
| Ni-Fe                                                                                 | 2.52  | 2.57  | 2.54              | 2.51    | 2.56  | 2.50  | 2.56    |
| Ni-Cp' <sub>centroid</sub>                                                            | 1.72  | 1.75  | 1.74              | 1.72    | 1.74  | 1.70  | 1.73    |
| Ni-S <sup>c</sup>                                                                     | 2.17  | 2.19  | 2.19              | 2.18    | 2.18  | 2.20  | 2.20    |
| Fe-S <sup>c</sup>                                                                     | 2.22  | 2.26  | 2.26              | 2.25    | 2.25  | 2.28  | 2.26    |
| Fe-P <sup>c</sup>                                                                     | 2.24  | 2.27  | 2.26              | 2.22    | 2.27  | 2.24  | 2.28    |
| Fe-C                                                                                  | 1.75  | 1.73  | 1.72              | 1.73    | 1.73  | 1.73  | 1.77    |
| S <sub>1</sub> -Ni-S <sub>2</sub>                                                     | 89.8  | 89.8  | 89.8              | 92.0    | 90.1  | 91.1  | 90.8    |
| S <sub>1</sub> -Fe-S <sub>2</sub>                                                     | 87.4  | 86.4  | 86.4              | 88.4    | 86.8  | 87.2  | 87.8    |
| P <sub>1</sub> -Fe-P <sub>2</sub>                                                     | 86.5  | 87.3  | 86.5              | 86.9    | 87.2  | 86.2  | 86.6    |
| S <sub>1</sub> -Ni-S <sub>2</sub> /<br>S <sub>1</sub> -Fe-S <sub>2</sub> <sup>d</sup> | 106.7 | 106.4 | 104.9             | 106.7   | 107.1 | 103.3 | 107.4   |

<sup>a</sup>Unless stated otherwise, the geometries were optimized in the gas phase using the SDD pseudopotential and associated basis set for Ni and Fe and the 6-31G\* basis set for all other atoms. <sup>b</sup>The geometries were optimized in CH<sub>2</sub>Cl<sub>2</sub> solvent using C-PCM. <sup>c</sup>Bond distance represents an average value. <sup>d</sup>Defined as the dihedral angle between the planes generated by the groups of three atoms listed.

**Table S8.** Selected Bond Lengths (Å) and Angles (°) for [2b]<sup>0a</sup>

|                                                                                       | Expt | Calc |
|---------------------------------------------------------------------------------------|------|------|
| Ni-Fe                                                                                 | 2.46 | 2.45 |
| Ni-Cp <sub>centroid</sub>                                                             | 1.82 | 1.82 |
| Ni-S <sup>b</sup>                                                                     | 2.31 | 2.32 |
| Fe-S <sup>b</sup>                                                                     | 2.29 | 2.33 |
| Fe-P <sup>b</sup>                                                                     | 2.19 | 2.22 |
| Fe-C                                                                                  | 1.74 | 1.73 |
| S <sub>1</sub> -Ni-S <sub>2</sub>                                                     | 82.2 | 83.4 |
| S <sub>1</sub> -Fe-S <sub>2</sub>                                                     | 83.1 | 83.1 |
| P <sub>1</sub> -Fe-P <sub>2</sub>                                                     | 85.4 | 86.8 |
| S <sub>1</sub> -Ni-S <sub>2</sub> /<br>S <sub>1</sub> -Fe-S <sub>2</sub> <sup>c</sup> | 90.9 | 89.5 |

<sup>a</sup>The geometries were optimized in the gas phase using the BP86 DFT functional, the SDD pseudopotential and associated basis set for Ni and Fe, and the 6-31G\* basis set for all other atoms. <sup>b</sup>Bond distance represents an average value. <sup>c</sup>Defined as the dihedral angle between the planes generated by the groups of three atoms listed.

**Table S9.** Calculated Reaction Free Energies and Free Energy Barriers using the BP86 Functional for Isomerization of Fe(CO)(dppe) from Dibasal to Apical-Basal for all Intermediates in the Proposed Catalytic Cycle when the pdt Ring is Oriented Toward Fe<sup>a,b,c</sup>

| Compound                         | $\Delta G^{od}$ | $\Delta G^{\ddagger,d,e}$ |
|----------------------------------|-----------------|---------------------------|
| [1a] <sup>0</sup>                | 4.66            | 11.29                     |
| [H1a] <sup>+</sup>               | 3.99            | 21.02                     |
| [H1a] <sup>0</sup>               | 5.16            | 22.21                     |
| [H <sub>2</sub> 1a] <sup>+</sup> | 9.41            | 27.26                     |
| [1a] <sup>+</sup>                | 3.34            | 20.36                     |

<sup>a</sup>See Figure 10 in main text for structures of all species. <sup>b</sup>The calculated values corresponding to the case where the pdt ring is oriented toward the Ni center are provided in the Main Text (Table 11). <sup>c</sup>All geometries were optimized in the gas phase using the SDD pseudopotential and associated basis set for Ni and Fe, the 6-31G\*\* basis set for the  $\mu$ -H ligand, and the 6-31G\* basis set for all other atoms. Solvation free energies were calculated in CH<sub>2</sub>Cl<sub>2</sub> using C-PCM. <sup>d</sup>Values given in kcal/mol relative to the dibasal isomer. <sup>e</sup>The potential energy surface was found to be relatively flat along the isomerization pathway, leading to relatively small imaginary frequencies for the transition states (TSS).

**Table S10.** Calculated Spin Densities and Bond Lengths (Å) of [1a]<sup>0</sup>, [H1a]<sup>+</sup>, and [H1a]<sup>0</sup> Using the BP86 Functional when the pdt Ring is Oriented Toward Fe<sup>a,b</sup>

|                              | [1a] <sup>0</sup> |         | [H1a] <sup>+</sup> |         | [H1a] <sup>0</sup> |         |
|------------------------------|-------------------|---------|--------------------|---------|--------------------|---------|
|                              | Cycle A           | Cycle B | Cycle A            | Cycle B | Cycle A            | Cycle B |
| $\rho(\text{Ni})$            | 0.71              | 0.70    | 0.45               | 0.40    | 0.00               | 0.00    |
| $\rho(\text{Fe})$            | -0.17             | -0.17   | 0.23               | 0.33    | 0.00               | 0.00    |
| $\rho(2\text{S})$            | 0.23              | 0.23    | 0.13               | 0.10    | 0.00               | 0.00    |
| $\rho(\text{C}_5\text{H}_5)$ | 0.25              | 0.24    | 0.17               | 0.15    | 0.00               | 0.00    |
| $d(\text{Ni-Fe})$            | 2.53              | 2.72    | 2.60               | 2.60    | 3.08               | 2.87    |
| $d(\text{Ni-H})$             | n/a               | n/a     | 1.80               | 1.77    | 2.53               | 2.04    |
| $d(\text{Fe-H})$             | n/a               | n/a     | 1.61               | 1.58    | 1.54               | 1.53    |

<sup>a</sup>For these calculations, the pdt ring is oriented toward the Fe center. An analogous table for the pdt ring oriented toward the Ni center is provided in the Main Text (Table 10). <sup>b</sup>The geometries were optimized in the gas phase using the SDD pseudopotential and associated basis set for Ni and Fe, the 6-31G\*\* basis set for the  $\mu$ -H ligand, and the 6-31G\* basis set for all other atoms.

**Table S11.** Calculated  $\nu_{\text{CO}}$  (cm<sup>-1</sup>) for all Intermediates in the Catalytic Cycle of [1a]<sup>+</sup> Using the BP86 Functional<sup>a</sup>

|                                  | Expt | Calc <sup>b</sup> |         |
|----------------------------------|------|-------------------|---------|
|                                  |      | Cycle A           | Cycle B |
| [1a] <sup>0</sup>                | 1901 | 1901              | 1904    |
| [H1a] <sup>+</sup>               | n/a  | 1947              | 1963    |
| [H1a] <sup>0</sup>               | n/a  | 1910              | 1924    |
| [H <sub>2</sub> 1a] <sup>+</sup> | n/a  | 1957              | 1968    |
| [1a] <sup>+</sup>                | 1943 | 1946              | 1949    |

<sup>a</sup>See Figure 10 in Main Text for structures of all intermediates. <sup>b</sup>The geometries were optimized in the gas phase using the SDD pseudopotential and associated basis set for Ni and Fe, the 6-31G\*\* basis set for the  $\mu$ -H ligand, and the 6-31G\* basis set for all other atoms.

## Electronic Structure of $[1a]^+$ , $[1a]^0$ , $[2b]^+$ , and $[2b]^0$

The unusually short Ni–Fe distance in both  $[1a]^+$  and  $[1a]^0$  (2.5145 and 2.4593 Å, respectively) is attributed to the  $\sigma$ -bond between the two metal centers. This  $\sigma$ -bond can be localized using the Pipek-Mezey criteria, and an analysis of the bonding nature is provided in the Main Text. It is also possible to localize the Ni–Fe bond using Natural Bond Orbitals (NBO). For  $[1a]^+$ , the Pipek-Mezey localized MO (Figure 9, left) reveals that the 2-center, 2-electron bond is dative in nature, with Ni donating electron density to Fe. Interestingly, NBO cannot localize this dative bond and instead represents it as a lone pair on the Ni center. This result suggests that either no such bond exists or that the bond is highly polarized (<5% contribution from Fe). The observations that the bond can be localized using the Pipek-Mezey criteria and the Ni–Fe distance is very short suggest that the latter explanation is more accurate for  $[1a]^+$ . In contrast, NBO is able to localize the 2-center, 2-electron Ni–Fe  $\sigma$ -bond in  $[1a]^0$  (Figure S55), and it is qualitatively similar to the Pipek-Mezey localized MO (Figure 9, right). Again, the shortening of the bond upon reduction of  $[1a]^+$  to  $[1a]^0$  is due to the increased covalency (i.e., strengthening) of the Ni–Fe  $\sigma$ -bond, which has nearly equal contribution from Ni and Fe.

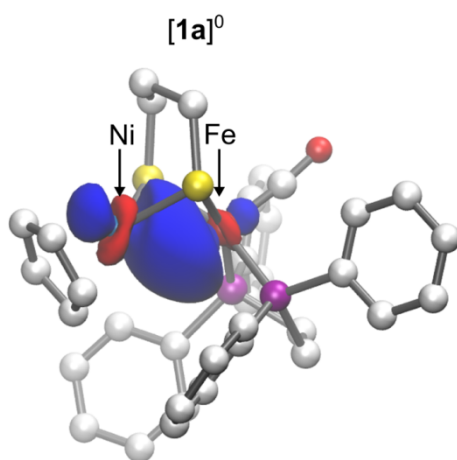

**Figure S55.** Natural Bond Orbital (NBO) of  $[1a]^0$  showing the Ni–Fe  $\sigma$ -bond from the structure optimized in the gas phase using BP86/SDD/6-31G\*. The hydrogens have been removed for clarity.

As mentioned in the Main Text, the isomerization of the Fe(CO)(dppe) subunit from the dibasal (Cycle A) to apical-basal (Cycle B) orientation does not disrupt the Ni–Fe  $\sigma$ -bond in  $[1a]^+$  and  $[1a]^0$  (Figure 9). The Pipek-Mezey localized MOs for the apical-basal isomer are shown in Figure S56 and are in qualitative agreement with the bonding MOs shown in Figure 9 of the Main Text for the dibasal isomer. The composition of the bonding MO in  $[1a]^+$  is heavily Ni-based and in  $[1a]^0$  is nearly equally split between Ni and Fe.

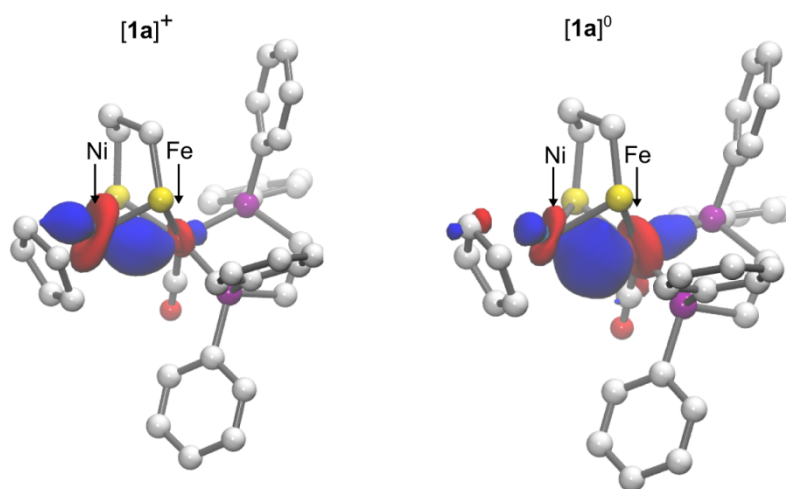

**Figure S56.** Pipek-Mezey localized molecular orbitals showing the Ni–Fe  $\sigma$ -bonds in  $[1\mathbf{a}]^+$  (left) and  $[1\mathbf{a}]^0$  (right) for the apical-basal isomer. The composition of the MO in  $[1\mathbf{a}]^+$  is 74% Ni and 26% Fe, and the MO in  $[1\mathbf{a}]^0$  is 48% Ni and 52% Fe. The analogous figure for the dibasal isomer is provided in the Main Text (Figure 9). The hydrogens have been removed for clarity.

In addition to the preservation of the Ni–Fe bond, the apical-basal (Cycle B) isomer of  $[1\mathbf{a}]^0$  also maintains the localization of the unpaired spin density about the Ni coordination sphere (Table 10 in Main Text and Table S10), suggesting that the reduction from  $[1\mathbf{a}]^+$  to  $[1\mathbf{a}]^0$  is Ni-based regardless of the Fe(CO)(dppe) and pdt orientations. The plot of the spin density is depicted in Figure S57.

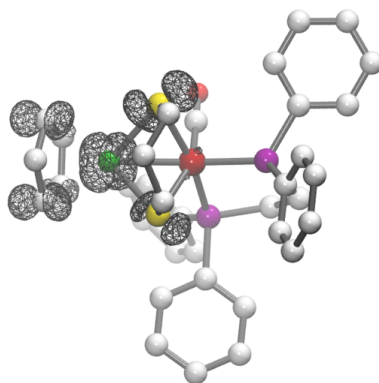

**Figure S57.** Top-down view of the isocontour plot of the unpaired spin density for the apical-basal isomer of  $[1\mathbf{a}]^0$ , showing the localization about the Ni coordination sphere. Color Scheme: green, Ni; maroon, Fe; yellow, S; purple, P; red, O; white, C. The analogous figure for the dibasal isomer is provided in Figure 6 of Main Text. The hydrogens have been removed for clarity.

As mentioned in the Main Text, the chemical bonding pattern is qualitatively similar for the  $[2\mathbf{b}]^+$  and  $[2\mathbf{b}]^0$  species. The Pipek-Mezey localized MOs featuring the Ni–Fe  $\sigma$ -bonds are shown in Figure S58. Again, the composition of the bonding MO in  $[2\mathbf{b}]^+$  is heavily Ni-based and in  $[2\mathbf{a}]^0$  is nearly equally split between Ni and Fe.

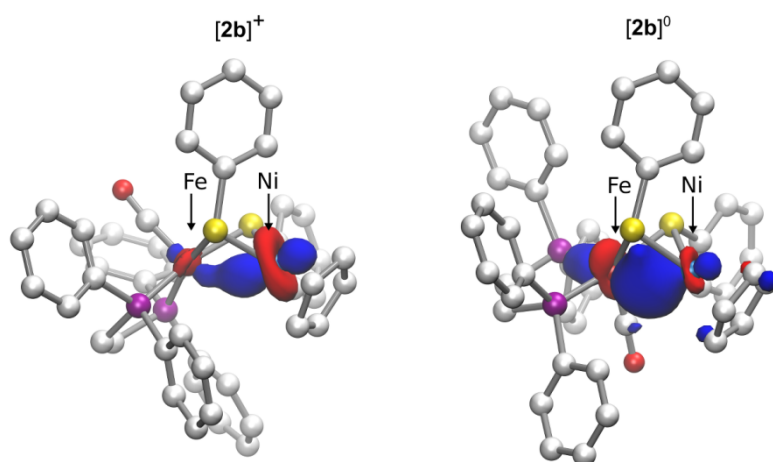

**Figure S58.** Pipek-Mezey localized molecular orbitals showing the Ni–Fe  $\sigma$ -bonds in  $[2b]^+$  (left) and  $[2b]^0$  (right). The composition of the MO in  $[2b]^+$  is 88% Ni and 12% Fe, and the MO in  $[2b]^0$  is 42% Ni and 58% Fe. The hydrogens have been removed for clarity.



## Comparing the Isomerization between Cycle A and Cycle B for $[1a]^+$ and $[1a]^0$ .

The structures of  $[1a]^+$  and  $[1a]^0$  are similar; however, the main difference is that the Ni center is reduced from Ni(II) to Ni(I) in  $[1a]^0$ , which contracts the Ni–Fe bond and elongates the Ni-ligand bonds. The isomerization of the Fe(CO)(dppe) subunit from dibasal (Cycle A) to apical-basal (Cycle B) proceeds through a lower free energy barrier for  $[1a]^0$  (11.76 kcal/mol) than for  $[1a]^+$  (21.54 kcal/mol). While the structures of  $[1a]^+$  and  $[1a]^0$  are similar, the transition states (TSs) associated with their respective isomerizations are quite different. As seen in Figure S59, the TS for  $[1a]^0$  features an elongated Ni–Fe distance and intramolecular electron transfer from the Ni to the Fe center to form a Ni(II)Fe(I) TS. The pentacoordinate Fe(I) center of the TS of  $[1a]^0$  is more accommodating of rotation than the hexacoordinate Fe(II) center in the TS of  $[1a]^+$ . Similar arguments could be made for the other intermediates in the catalytic cycle, which also feature hexacoordinate Fe(II) centers and further rigidifying bridging hydride ligands.

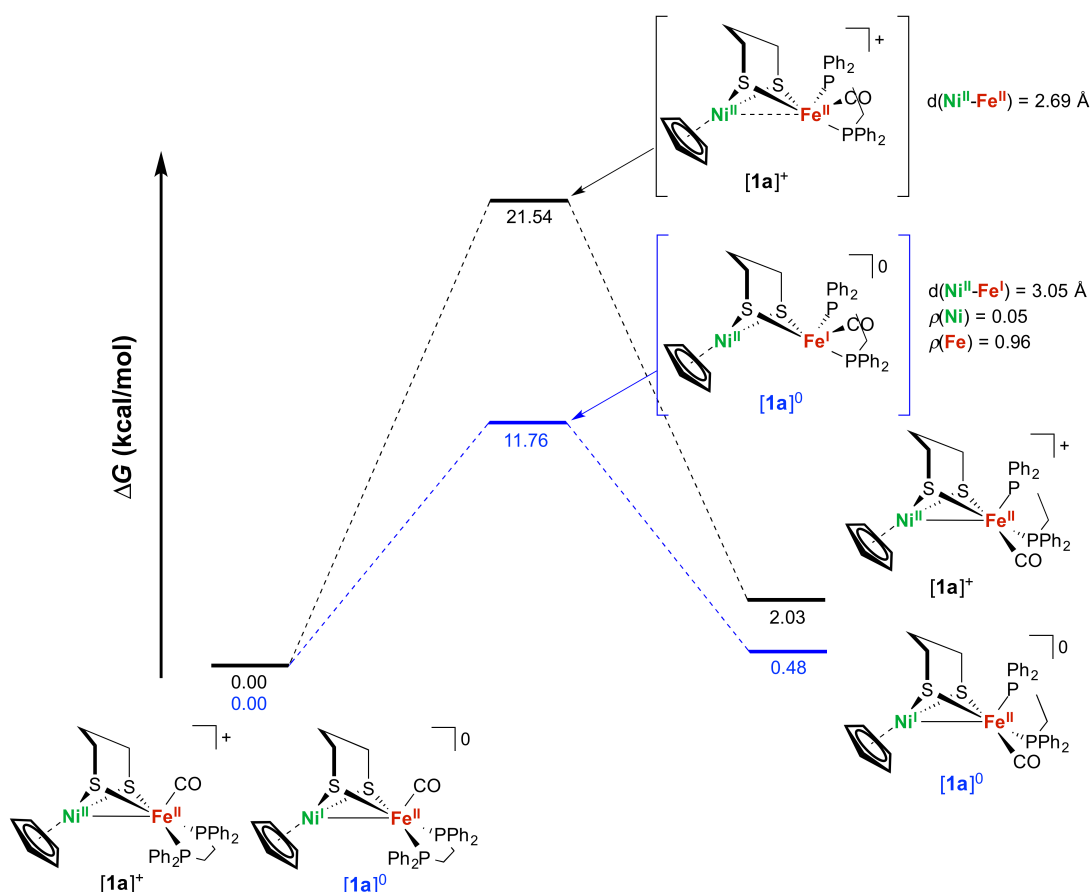

**Figure S59.** Free energy diagram for the isomerization of the Fe(CO)(dppe) subunit from dibasal (Cycle A) to apical-basal (Cycle B) for  $[1a]^+$  (black numbers) and  $[1a]^0$  (blue numbers).

The following tables provide the optimized Cartesian coordinates of all species studied herein. The geometries were optimized in the gas phase using the BP86 functional with the SDD pseudopotential and associated basis set for the Ni and Fe centers, the 6-31G\*\* basis set for the  $\mu$ -H ligands, and the 6-31G\* basis set for all other atoms.

**Table S12.** [CpNi<sup>II</sup>(pdt)Fe<sup>II</sup>(dppe)(CO)]<sup>+</sup> in Cycle A with pdt Oriented Toward Ni ([**1a**]<sup>+</sup>, -3204.21402316  $E_h$ )

| atom | x         | y         | z         |
|------|-----------|-----------|-----------|
| Ni   | 10.278976 | 8.685769  | 7.506633  |
| Fe   | 11.605186 | 6.865203  | 8.768546  |
| P    | 11.263092 | 6.829652  | 11.024459 |
| S    | 11.987742 | 9.091285  | 8.831761  |
| P    | 10.560518 | 4.854142  | 8.701351  |
| S    | 11.442101 | 7.097433  | 6.527789  |
| C    | 11.113074 | 1.111088  | 7.031790  |
| H    | 10.570711 | 0.159524  | 7.024950  |
| C    | 12.338349 | 1.231423  | 6.353184  |
| H    | 12.754288 | 0.371789  | 5.816998  |
| C    | 8.134972  | 9.289818  | 12.145532 |
| H    | 7.080481  | 9.395395  | 11.866868 |
| C    | 7.701224  | 4.824240  | 9.026236  |
| H    | 7.861467  | 4.769000  | 10.107699 |
| C    | 8.687911  | 10.112983 | 13.142266 |
| H    | 8.066944  | 10.865528 | 13.639630 |
| C    | 9.299120  | 10.580691 | 7.258654  |
| H    | 9.790755  | 11.548872 | 7.366544  |
| C    | 10.035699 | 9.961105  | 13.500969 |
| H    | 10.472054 | 10.594259 | 14.280905 |
| C    | 13.211065 | 6.246680  | 8.899772  |
| C    | 12.492450 | 3.558715  | 7.048198  |
| H    | 13.035621 | 4.506723  | 7.048386  |
| C    | 9.153014  | 9.835937  | 6.064131  |
| H    | 9.500491  | 10.119053 | 5.069690  |
| C    | 13.192655 | 9.363756  | 6.225170  |
| H    | 12.339751 | 9.980391  | 5.885046  |
| H    | 14.090783 | 9.735658  | 5.691013  |
| C    | 6.139257  | 4.876385  | 7.157791  |
| H    | 5.111439  | 4.879506  | 6.779900  |
| C    | 11.267019 | 3.445608  | 7.735024  |
| C    | 13.024396 | 2.455020  | 6.360487  |
| H    | 13.977533 | 2.555602  | 5.830424  |
| C    | 10.833104 | 8.988205  | 12.874802 |
| H    | 11.876553 | 8.867991  | 13.180845 |
| C    | 8.492769  | 8.589646  | 6.409997  |
| H    | 8.261360  | 7.780497  | 5.716321  |
| O    | 14.339087 | 5.909988  | 8.918349  |
| C    | 10.524630 | 4.174101  | 10.451898 |
| H    | 9.782377  | 3.360675  | 10.541610 |
| H    | 11.523267 | 3.726437  | 10.607420 |
| C    | 7.222391  | 4.889727  | 6.261278  |
| H    | 7.040858  | 4.892537  | 5.180703  |
| C    | 10.265875 | 5.299962  | 11.461768 |
| H    | 10.459527 | 4.985166  | 12.502085 |
| H    | 9.212991  | 5.628480  | 11.431394 |

|   |           |           |           |
|---|-----------|-----------|-----------|
| C | 10.288302 | 8.160544  | 11.871609 |
| C | 10.576537 | 2.210909  | 7.715299  |
| H | 9.610758  | 2.110252  | 8.223519  |
| C | 8.710647  | 9.810802  | 8.347974  |
| H | 8.688047  | 10.116955 | 9.394790  |
| C | 8.164613  | 8.608110  | 7.806899  |
| H | 7.642808  | 7.817789  | 8.346388  |
| C | 6.382154  | 4.840026  | 8.539818  |
| H | 5.544973  | 4.807805  | 9.245654  |
| C | 12.966342 | 7.907578  | 5.816400  |
| H | 13.819221 | 7.270857  | 6.112116  |
| H | 12.844323 | 7.831040  | 4.722037  |
| C | 8.932163  | 8.327676  | 11.507926 |
| H | 8.494535  | 7.701678  | 10.720704 |
| C | 8.795718  | 4.846283  | 8.134463  |
| C | 8.539984  | 4.876979  | 6.743093  |
| H | 9.375697  | 4.867593  | 6.034657  |
| C | 12.834435 | 6.716880  | 11.989741 |
| C | 13.793833 | 7.744989  | 11.832438 |
| H | 13.585213 | 8.586646  | 11.161864 |
| C | 13.132433 | 5.633860  | 12.843363 |
| H | 12.420865 | 4.814478  | 12.984155 |
| C | 15.295793 | 6.616145  | 13.377681 |
| H | 16.248939 | 6.575600  | 13.915210 |
| C | 14.358003 | 5.583782  | 13.528183 |
| H | 14.575218 | 4.733295  | 14.183123 |
| C | 15.009307 | 7.699293  | 12.529984 |
| H | 15.737015 | 8.508295  | 12.404909 |
| C | 13.411493 | 9.573910  | 7.724135  |
| H | 13.587282 | 10.642530 | 7.938008  |
| H | 14.285679 | 9.003152  | 8.085456  |

---

**Table S13.** [CpNi<sup>II</sup>(pdt)Fe<sup>II</sup>(dppe)(CO)]<sup>+</sup> in Cycle A with pdt Oriented Toward Fe ([1a]<sup>+</sup>, -3204.21506968 E<sub>h</sub>)

| atom | x         | y         | z         |
|------|-----------|-----------|-----------|
| Ni   | 10.288890 | 8.654004  | 7.546586  |
| Fe   | 11.647336 | 6.844533  | 8.768726  |
| P    | 11.280366 | 6.824961  | 11.020321 |
| S    | 12.012952 | 9.076378  | 8.836414  |
| P    | 10.569520 | 4.855162  | 8.688245  |
| S    | 11.443890 | 7.092480  | 6.530323  |
| C    | 11.125432 | 1.107971  | 7.031393  |
| H    | 10.599190 | 0.147638  | 7.052975  |
| C    | 12.320888 | 1.243015  | 6.304079  |
| H    | 12.729993 | 0.385922  | 5.758667  |
| C    | 8.129038  | 9.262273  | 12.134497 |
| H    | 7.069939  | 9.349535  | 11.867319 |
| C    | 7.712015  | 4.826237  | 9.024997  |
| H    | 7.876651  | 4.769102  | 10.105634 |
| C    | 8.683337  | 10.108971 | 13.110498 |
| H    | 8.058433  | 10.860810 | 13.603980 |
| C    | 9.344119  | 10.561041 | 7.299863  |
| H    | 9.854654  | 11.518463 | 7.416333  |
| C    | 10.037855 | 9.981885  | 13.453225 |
| H    | 10.475838 | 10.634021 | 14.216402 |
| C    | 13.210121 | 6.130976  | 8.959611  |
| C    | 12.463055 | 3.578321  | 6.974529  |
| H    | 12.988300 | 4.536157  | 6.945034  |
| C    | 9.198698  | 9.821323  | 6.101981  |
| H    | 9.566151  | 10.098448 | 5.112984  |
| C    | 13.904206 | 8.580172  | 6.718733  |
| H    | 14.712853 | 9.044886  | 6.119051  |
| H    | 14.373063 | 7.773581  | 7.308531  |
| C    | 6.142140  | 4.877333  | 7.163316  |
| H    | 5.112735  | 4.878517  | 6.789770  |
| C    | 11.268419 | 3.450113  | 7.711244  |
| C    | 12.985532 | 2.477993  | 6.274317  |
| H    | 13.914922 | 2.589766  | 5.705710  |
| C    | 10.840013 | 9.009273  | 12.832925 |
| H    | 11.888850 | 8.908143  | 13.127133 |
| C    | 8.502461  | 8.591160  | 6.437067  |
| H    | 8.262294  | 7.788350  | 5.738989  |
| O    | 14.297249 | 5.688899  | 9.050502  |
| C    | 10.540058 | 4.170834  | 10.436419 |
| H    | 9.798677  | 3.356865  | 10.527412 |
| H    | 11.539565 | 3.724211  | 10.589179 |
| C    | 7.221355  | 4.895097  | 6.262277  |
| H    | 7.035325  | 4.899699  | 5.182511  |
| C    | 10.281198 | 5.294236  | 11.448952 |
| H    | 10.472012 | 4.974580  | 12.488067 |
| H    | 9.228629  | 5.623007  | 11.418537 |
| C    | 10.293190 | 8.157027  | 11.851439 |
| C    | 10.598032 | 2.204343  | 7.727295  |
| H    | 9.654327  | 2.091827  | 8.273157  |
| C    | 8.719312  | 9.804637  | 8.378631  |

|   |           |           |           |
|---|-----------|-----------|-----------|
| H | 8.688894  | 10.110502 | 9.425209  |
| C | 8.153329  | 8.617530  | 7.827886  |
| H | 7.608584  | 7.837372  | 8.359410  |
| C | 6.390926  | 4.839000  | 8.544221  |
| H | 5.556881  | 4.803033  | 9.253567  |
| C | 12.883587 | 7.985443  | 5.749995  |
| H | 13.362466 | 7.226760  | 5.105036  |
| H | 12.447688 | 8.758254  | 5.091527  |
| C | 8.930745  | 8.300550  | 11.501876 |
| H | 8.491751  | 7.659270  | 10.728046 |
| C | 8.802453  | 4.853117  | 8.128526  |
| C | 8.540954  | 4.884812  | 6.738481  |
| H | 9.373478  | 4.879134  | 6.026331  |
| C | 12.839321 | 6.723872  | 12.008485 |
| C | 13.814246 | 7.732855  | 11.825717 |
| H | 13.627267 | 8.547658  | 11.116957 |
| C | 13.109383 | 5.673876  | 12.911163 |
| H | 12.385555 | 4.869730  | 13.074589 |
| C | 15.276665 | 6.650350  | 13.440223 |
| H | 16.220663 | 6.619940  | 13.994310 |
| C | 14.323099 | 5.636896  | 13.617464 |
| H | 14.518732 | 4.811295  | 14.309948 |
| C | 15.017752 | 7.701170  | 12.544439 |
| H | 15.757933 | 8.495160  | 12.398142 |
| C | 13.343119 | 9.645757  | 7.658865  |
| H | 12.920274 | 10.500415 | 7.100614  |
| H | 14.142473 | 10.036431 | 8.314051  |

---

**Table S14.** [CpNi<sup>II</sup>(pdt)Fe<sup>II</sup>(dppe)(CO)]<sup>+</sup> in Cycle B with pdt Oriented Toward Ni ([1a]<sup>+</sup>, -3204.21250942 E<sub>h</sub>)

| atom | x         | y         | z         |
|------|-----------|-----------|-----------|
| Ni   | 10.402720 | 8.717211  | 7.549389  |
| Fe   | 11.457749 | 6.819719  | 8.815851  |
| P    | 13.193832 | 5.525003  | 9.311297  |
| S    | 12.107824 | 9.003699  | 8.924943  |
| P    | 10.891035 | 6.791479  | 11.026377 |
| S    | 11.530868 | 7.099384  | 6.572706  |
| C    | 7.506110  | 6.490987  | 13.390587 |
| H    | 7.290024  | 6.468939  | 14.464115 |
| C    | 6.461053  | 6.380029  | 12.457223 |
| H    | 5.427495  | 6.269408  | 12.802046 |
| C    | 16.485192 | 7.932358  | 10.076622 |
| H    | 16.758910 | 8.691519  | 10.817385 |
| C    | 12.545502 | 7.879507  | 13.111382 |
| H    | 12.990164 | 6.886190  | 13.229592 |
| C    | 17.384651 | 7.588085  | 9.052241  |
| H    | 18.363293 | 8.076112  | 8.993772  |
| C    | 9.511111  | 10.389802 | 6.516619  |
| H    | 10.040619 | 11.125946 | 5.911171  |
| C    | 17.023744 | 6.615649  | 8.106575  |
| H    | 17.719994 | 6.339653  | 7.307242  |
| C    | 10.379738 | 5.459577  | 8.592522  |
| C    | 8.070555  | 6.556293  | 10.640382 |
| H    | 8.285698  | 6.581121  | 9.568736  |
| C    | 8.961356  | 9.149411  | 6.063305  |
| H    | 9.012835  | 8.757568  | 5.045908  |
| C    | 13.363190 | 9.296494  | 6.338834  |
| H    | 12.532715 | 9.926560  | 5.968900  |
| H    | 14.284716 | 9.647159  | 5.831282  |
| C    | 12.412205 | 10.197263 | 13.846039 |
| H    | 12.751341 | 11.005528 | 14.502508 |
| C    | 9.125567  | 6.661913  | 11.569383 |
| C    | 6.744575  | 6.414872  | 11.083421 |
| H    | 5.933704  | 6.329869  | 10.351909 |
| C    | 15.773372 | 5.979268  | 8.186610  |
| H    | 15.513582 | 5.203813  | 7.458475  |
| C    | 8.317934  | 8.486809  | 7.182074  |
| H    | 7.797423  | 7.529499  | 7.133939  |
| O    | 9.639047  | 4.562436  | 8.418867  |
| C    | 11.633968 | 5.187493  | 11.654892 |
| H    | 11.596990 | 5.136056  | 12.757809 |
| H    | 10.964469 | 4.396283  | 11.271310 |
| C    | 11.394499 | 10.432083 | 12.905939 |
| H    | 10.935463 | 11.423607 | 12.829024 |
| C    | 13.063496 | 4.991107  | 11.123343 |
| H    | 13.374643 | 3.936673  | 11.215876 |
| H    | 13.789238 | 5.598453  | 11.690103 |
| C    | 14.867300 | 6.312556  | 9.218002  |
| C    | 8.830020  | 6.635093  | 12.952272 |
| H    | 9.633858  | 6.739526  | 13.689604 |
| C    | 9.263967  | 10.465269 | 7.927551  |

|   |           |           |           |
|---|-----------|-----------|-----------|
| H | 9.592848  | 11.267927 | 8.590007  |
| C | 8.499259  | 9.305111  | 8.332426  |
| H | 8.144095  | 9.092876  | 9.341265  |
| C | 12.983735 | 8.920014  | 13.948950 |
| H | 13.765251 | 8.723911  | 14.691072 |
| C | 13.119232 | 7.842296  | 5.939930  |
| H | 13.934888 | 7.189612  | 6.299195  |
| H | 13.054551 | 7.746432  | 4.842118  |
| C | 15.231325 | 7.307329  | 10.155333 |
| H | 14.532946 | 7.610209  | 10.944876 |
| C | 11.528370 | 8.106605  | 12.159411 |
| C | 10.957670 | 9.397069  | 12.067545 |
| H | 10.153079 | 9.586516  | 11.348292 |
| C | 13.422246 | 3.937418  | 8.388616  |
| C | 12.720293 | 3.672333  | 7.195065  |
| H | 12.016963 | 4.410147  | 6.797972  |
| C | 14.338756 | 2.973503  | 8.873848  |
| H | 14.922583 | 3.168465  | 9.780769  |
| C | 13.815774 | 1.507174  | 7.004061  |
| H | 13.963799 | 0.562097  | 6.470859  |
| C | 14.530035 | 1.766745  | 8.186754  |
| H | 15.240432 | 1.028992  | 8.574891  |
| C | 12.916436 | 2.462365  | 6.507995  |
| H | 12.358768 | 2.268253  | 5.585654  |
| C | 13.541024 | 9.503311  | 7.843123  |
| H | 13.697825 | 10.572987 | 8.066358  |
| H | 14.413599 | 8.943460  | 8.223250  |

---

**Table S15.** [CpNi<sup>II</sup>(pdt)Fe<sup>II</sup>(dppe)(CO)]<sup>+</sup> in Cycle B with pdt Oriented Toward Fe ([1a]<sup>+</sup>, -3204.21195089 E<sub>h</sub>)

| atom | x         | y         | z         |
|------|-----------|-----------|-----------|
| Ni   | 10.329214 | 8.711862  | 7.628986  |
| Fe   | 11.495072 | 6.804895  | 8.777204  |
| P    | 13.248253 | 5.518554  | 9.302176  |
| S    | 12.136376 | 8.987428  | 8.858769  |
| P    | 10.922614 | 6.797971  | 10.981182 |
| S    | 11.354933 | 7.116386  | 6.527692  |
| C    | 7.525084  | 6.563514  | 13.332718 |
| H    | 7.302782  | 6.596327  | 14.404693 |
| C    | 6.489782  | 6.372132  | 12.401864 |
| H    | 5.457075  | 6.253723  | 12.746626 |
| C    | 16.462542 | 7.990453  | 10.148369 |
| H    | 16.652853 | 8.836382  | 10.818048 |
| C    | 12.568699 | 7.905356  | 13.061059 |
| H    | 13.013139 | 6.913336  | 13.189247 |
| C    | 17.482482 | 7.511768  | 9.307029  |
| H    | 18.470146 | 7.984887  | 9.317306  |
| C    | 9.462298  | 10.450441 | 6.709078  |
| H    | 10.008776 | 11.198142 | 6.133397  |
| C    | 17.230356 | 6.424847  | 8.456042  |
| H    | 18.020413 | 6.044554  | 7.799510  |
| C    | 10.456279 | 5.410983  | 8.577741  |
| C    | 8.106787  | 6.488627  | 10.586057 |
| H    | 8.326015  | 6.462244  | 9.515467  |
| C    | 8.860397  | 9.258373  | 6.204994  |
| H    | 8.874727  | 8.918044  | 5.168042  |
| C    | 13.884382 | 8.468116  | 6.617894  |
| H    | 14.683552 | 8.917050  | 5.993862  |
| H    | 14.335153 | 7.604945  | 7.135483  |
| C    | 12.434659 | 10.230301 | 13.772712 |
| H    | 12.771832 | 11.044467 | 14.422860 |
| C    | 9.152395  | 6.675487  | 11.513251 |
| C    | 6.782259  | 6.336338  | 11.029816 |
| H    | 5.979212  | 6.188112  | 10.299766 |
| C    | 15.966265 | 5.810889  | 8.444586  |
| H    | 15.785341 | 4.958545  | 7.782315  |
| C    | 8.219585  | 8.559308  | 7.305531  |
| H    | 7.670189  | 7.620860  | 7.219747  |
| O    | 9.749219  | 4.485342  | 8.417716  |
| C    | 11.647680 | 5.196275  | 11.631879 |
| H    | 11.600806 | 5.159683  | 12.735080 |
| H    | 10.973561 | 4.406770  | 11.253056 |
| C    | 11.421825 | 10.457512 | 12.825447 |
| H    | 10.964776 | 11.448977 | 12.736802 |
| C    | 13.078347 | 4.984269  | 11.113624 |
| H    | 13.379098 | 3.927797  | 11.215633 |
| H    | 13.804411 | 5.588701  | 11.683246 |
| C    | 14.938687 | 6.283178  | 9.289252  |
| C    | 8.847944  | 6.717383  | 12.894002 |
| H    | 9.643859  | 6.881394  | 13.628903 |
| C    | 9.241745  | 10.460994 | 8.130589  |



|   |           |           |           |
|---|-----------|-----------|-----------|
| H | 9.609091  | 11.220207 | 8.823479  |
| C | 8.440195  | 9.314259  | 8.489885  |
| H | 8.096620  | 9.059863  | 9.492789  |
| C | 13.004140 | 8.953420  | 13.890534 |
| H | 13.782523 | 8.763614  | 14.637502 |
| C | 12.772918 | 7.985633  | 5.691987  |
| H | 13.164609 | 7.241406  | 4.975168  |
| H | 12.329793 | 8.813189  | 5.108921  |
| C | 15.196726 | 7.386276  | 10.136312 |
| H | 14.407416 | 7.781433  | 10.787597 |
| C | 11.556357 | 8.124741  | 12.102151 |
| C | 10.987701 | 9.415053  | 11.995038 |
| H | 10.186996 | 9.598003  | 11.269887 |
| C | 13.471694 | 3.934901  | 8.373046  |
| C | 12.840679 | 3.733408  | 7.128126  |
| H | 12.198485 | 4.514982  | 6.710066  |
| C | 14.304000 | 2.914188  | 8.891895  |
| H | 14.834247 | 3.055870  | 9.840422  |
| C | 13.839045 | 1.521233  | 6.951472  |
| H | 13.975882 | 0.582487  | 6.404309  |
| C | 14.482328 | 1.715852  | 8.185888  |
| H | 15.126759 | 0.933580  | 8.601022  |
| C | 13.023365 | 2.532614  | 6.422543  |
| H | 12.519765 | 2.388242  | 5.460793  |
| C | 13.452039 | 9.509310  | 7.647804  |
| H | 13.077535 | 10.431308 | 7.167462  |
| H | 14.309860 | 9.784497  | 8.286868  |

---

**Table S16.** [CpNi<sup>II</sup>(pdt)Fe<sup>II</sup>(dppe)(CO)]<sup>+</sup> Transition State with pdt Oriented Toward Ni ([1a]<sup>+</sup>, -3204.18116822 E<sub>h</sub>)

| atom | x         | y         | z         |
|------|-----------|-----------|-----------|
| Ni   | 10.144336 | 8.382023  | 6.946605  |
| Fe   | 11.391763 | 7.082924  | 8.949983  |
| P    | 12.005481 | 7.340579  | 11.116823 |
| S    | 11.352001 | 9.364678  | 8.486299  |
| P    | 9.554369  | 6.102962  | 9.695009  |
| S    | 11.732148 | 6.910882  | 6.624899  |
| C    | 7.606676  | 2.545646  | 8.800631  |
| H    | 6.969003  | 1.830452  | 9.331177  |
| C    | 7.958636  | 2.319563  | 7.459358  |
| H    | 7.597138  | 1.425245  | 6.940879  |
| C    | 11.535858 | 11.212425 | 12.622813 |
| H    | 10.968012 | 12.114147 | 12.368842 |
| C    | 8.214989  | 8.352978  | 10.767518 |
| H    | 9.215431  | 8.702006  | 11.041067 |
| C    | 12.343630 | 11.187010 | 13.769583 |
| H    | 12.406919 | 12.066914 | 14.418626 |
| C    | 9.326908  | 9.245240  | 5.117491  |
| H    | 9.912026  | 9.602841  | 4.269698  |
| C    | 13.074145 | 10.028188 | 14.079404 |
| H    | 13.707739 | 9.997987  | 14.972380 |
| C    | 12.128542 | 5.513632  | 8.938855  |
| C    | 9.250261  | 4.382383  | 7.456260  |
| H    | 9.910459  | 5.079891  | 6.931226  |
| C    | 8.876778  | 7.889401  | 5.330242  |
| H    | 9.063900  | 7.048982  | 4.659096  |
| C    | 13.181224 | 9.369485  | 6.255281  |
| H    | 12.379008 | 9.733474  | 5.586986  |
| H    | 14.132212 | 9.801692  | 5.881808  |
| C    | 5.810021  | 8.726654  | 10.734690 |
| H    | 4.940714  | 9.339485  | 10.995473 |
| C    | 8.901378  | 4.621528  | 8.801972  |
| C    | 8.781041  | 3.238583  | 6.789763  |
| H    | 9.069642  | 3.062248  | 5.748031  |
| C    | 13.001595 | 8.901952  | 13.246255 |
| H    | 13.583104 | 8.009796  | 13.499328 |
| C    | 8.105179  | 7.834525  | 6.546783  |
| H    | 7.611464  | 6.952108  | 6.951579  |
| O    | 12.647818 | 4.460544  | 8.864672  |
| C    | 9.999664  | 5.369274  | 11.377625 |
| H    | 9.087946  | 5.051537  | 11.912464 |
| H    | 10.600176 | 4.467024  | 11.161182 |
| C    | 5.641331  | 7.528063  | 10.023580 |
| H    | 4.639268  | 7.201409  | 9.725184  |
| C    | 10.790545 | 6.390917  | 12.202213 |
| H    | 11.310867 | 5.928561  | 13.059706 |
| H    | 10.112108 | 7.157632  | 12.615944 |
| C    | 12.189461 | 8.917447  | 12.087019 |
| C    | 8.074141  | 3.686726  | 9.469754  |
| H    | 7.783941  | 3.846234  | 10.513789 |
| C    | 8.923502  | 9.996385  | 6.252011  |

|   |           |           |           |
|---|-----------|-----------|-----------|
| H | 9.145798  | 11.047616 | 6.443666  |
| C | 8.167514  | 9.123105  | 7.142902  |
| H | 7.723223  | 9.418599  | 8.093970  |
| C | 7.101469  | 9.136718  | 11.107457 |
| H | 7.245234  | 10.070657 | 11.661638 |
| C | 13.279983 | 7.848125  | 6.155472  |
| H | 14.092729 | 7.450415  | 6.788382  |
| H | 13.479402 | 7.543456  | 5.113497  |
| C | 11.455856 | 10.085796 | 11.787204 |
| H | 10.839749 | 10.132428 | 10.885801 |
| C | 8.055165  | 7.136697  | 10.065696 |
| C | 6.753194  | 6.735525  | 9.691716  |
| H | 6.600819  | 5.799184  | 9.146053  |
| C | 13.660778 | 6.557540  | 11.367860 |
| C | 14.806736 | 7.262794  | 10.931060 |
| H | 14.703712 | 8.277280  | 10.527612 |
| C | 13.815787 | 5.261982  | 11.902542 |
| H | 12.946080 | 4.686586  | 12.237288 |
| C | 16.225062 | 5.395135  | 11.576737 |
| H | 17.219394 | 4.944204  | 11.660558 |
| C | 15.093049 | 4.686949  | 12.008413 |
| H | 15.199805 | 3.681767  | 12.429793 |
| C | 16.079594 | 6.685749  | 11.038694 |
| H | 16.960470 | 7.246439  | 10.707743 |
| C | 12.949014 | 9.897890  | 7.670048  |
| H | 12.905992 | 11.000544 | 7.664649  |
| H | 13.763165 | 9.590939  | 8.350048  |

---

**Table S17.** [CpNi<sup>II</sup>(pdt)Fe<sup>II</sup>(dppe)(CO)]<sup>+</sup> Transition State with pdt Oriented Toward Fe ([1a]<sup>+</sup>, -3204.18536467 E<sub>h</sub>)

| atom | x         | y         | z         |
|------|-----------|-----------|-----------|
| Ni   | 10.128052 | 8.350780  | 6.973368  |
| Fe   | 11.408357 | 7.080048  | 8.942431  |
| P    | 12.021156 | 7.337268  | 11.111976 |
| S    | 11.348941 | 9.356855  | 8.482025  |
| P    | 9.564547  | 6.106750  | 9.681695  |
| S    | 11.712460 | 6.890707  | 6.616337  |
| C    | 7.591971  | 2.559601  | 8.803664  |
| H    | 6.948895  | 1.852430  | 9.338428  |
| C    | 7.942437  | 2.322872  | 7.463865  |
| H    | 7.574510  | 1.428176  | 6.950592  |
| C    | 11.547240 | 11.214479 | 12.609928 |
| H    | 10.994181 | 12.121804 | 12.343561 |
| C    | 8.238699  | 8.358199  | 10.766526 |
| H    | 9.241644  | 8.702457  | 11.037130 |
| C    | 12.326376 | 11.179790 | 13.775978 |
| H    | 12.382407 | 12.058149 | 14.427767 |
| C    | 9.363356  | 9.251452  | 5.160093  |
| H    | 9.977311  | 9.625312  | 4.340104  |
| C    | 13.037593 | 10.013300 | 14.101676 |
| H    | 13.648999 | 9.975586  | 15.009705 |
| C    | 12.152373 | 5.513414  | 8.937068  |
| C    | 9.248726  | 4.376516  | 7.448989  |
| H    | 9.913115  | 5.065983  | 6.919041  |
| C    | 8.889163  | 7.897191  | 5.323313  |
| H    | 9.086968  | 7.071330  | 4.637327  |
| C    | 13.808990 | 8.785015  | 7.114750  |
| H    | 14.719027 | 9.246443  | 6.680668  |
| H    | 14.131856 | 8.182718  | 7.985896  |
| C    | 5.835511  | 8.743709  | 10.742276 |
| H    | 4.970002  | 9.360091  | 11.007307 |
| C    | 8.901867  | 4.626335  | 8.793163  |
| C    | 8.771453  | 3.232092  | 6.789180  |
| H    | 9.058760  | 3.047950  | 5.748440  |
| C    | 12.974633 | 8.889132  | 13.265054 |
| H    | 13.542176 | 7.991568  | 13.530455 |
| C    | 8.080095  | 7.821672  | 6.514648  |
| H    | 7.569026  | 6.933252  | 6.883514  |
| O    | 12.670192 | 4.459665  | 8.864066  |
| C    | 10.011178 | 5.367012  | 11.361607 |
| H    | 9.099406  | 5.048206  | 11.895695 |
| H    | 10.609995 | 4.464587  | 11.141265 |
| C    | 5.658833  | 7.547822  | 10.028437 |
| H    | 4.654273  | 7.226908  | 9.732184  |
| C    | 10.803422 | 6.383259  | 12.190941 |
| H    | 11.323965 | 5.915297  | 13.045232 |
| H    | 10.125800 | 7.148246  | 12.609034 |
| C    | 12.191612 | 8.914042  | 12.085915 |
| C    | 8.067758  | 3.701129  | 9.466046  |
| H    | 7.778000  | 3.868737  | 10.508894 |
| C    | 8.929781  | 9.978799  | 6.301396  |

|   |           |           |           |
|---|-----------|-----------|-----------|
| H | 9.154827  | 11.023089 | 6.525313  |
| C | 8.133888  | 9.093460  | 7.142977  |
| H | 7.664532  | 9.370559  | 8.087383  |
| C | 7.130111  | 9.146431  | 11.112074 |
| H | 7.280317  | 10.078298 | 11.668012 |
| C | 13.196638 | 7.866219  | 6.060568  |
| H | 13.923969 | 7.095654  | 5.748896  |
| H | 12.889242 | 8.430120  | 5.160974  |
| C | 11.476536 | 10.089572 | 11.770897 |
| H | 10.880337 | 10.142873 | 10.856454 |
| C | 8.070743  | 7.144830  | 10.061746 |
| C | 6.765847  | 6.750834  | 9.690923  |
| H | 6.607317  | 5.817216  | 9.142477  |
| C | 13.677248 | 6.560988  | 11.380230 |
| C | 14.828871 | 7.283330  | 10.989089 |
| H | 14.729190 | 8.307238  | 10.609993 |
| C | 13.827185 | 5.253374  | 11.886428 |
| H | 12.953223 | 4.665254  | 12.186257 |
| C | 16.242597 | 5.407381  | 11.621749 |
| H | 17.237336 | 4.959852  | 11.718114 |
| C | 15.104901 | 4.682658  | 12.008641 |
| H | 15.207466 | 3.667935  | 12.407590 |
| C | 16.102212 | 6.710316  | 11.112906 |
| H | 16.987288 | 7.284076  | 10.817498 |
| C | 12.883138 | 9.907039  | 7.578892  |
| H | 12.550344 | 10.535604 | 6.733129  |
| H | 13.399652 | 10.560738 | 8.304410  |

---

**Table S18.**  $[\text{CpNi}^{\text{II}}(\text{pdt})\text{Fe}^{\text{II}}(\text{dppe})(\text{CO})]^+$  Transition State for Interconverting  $^{31}\text{P}$  Sites in Cycle B with pdt Oriented Toward Ni ( $[\mathbf{1a}]^+$ ,  $-3204.19703182 E_{\text{h}}$ )

| atom | x         | y         | z         |
|------|-----------|-----------|-----------|
| Ni   | 9.959845  | 8.635246  | 7.737942  |
| Fe   | 11.361653 | 6.834973  | 8.962178  |
| P    | 11.576109 | 4.634731  | 8.668420  |
| S    | 11.737520 | 9.113903  | 8.977579  |
| P    | 12.304073 | 6.555967  | 10.943862 |
| S    | 11.108269 | 7.071974  | 6.671667  |
| C    | 12.215189 | 8.278021  | 14.704764 |
| H    | 12.820559 | 8.229809  | 15.616266 |
| C    | 11.057404 | 9.073408  | 14.666475 |
| H    | 10.757855 | 9.647513  | 15.549763 |
| C    | 15.248507 | 4.562617  | 6.769055  |
| H    | 16.091172 | 5.252007  | 6.648067  |
| C    | 14.984016 | 5.535441  | 11.060852 |
| H    | 14.556760 | 4.535294  | 11.182849 |
| C    | 15.310741 | 3.269654  | 6.224634  |
| H    | 16.199907 | 2.949534  | 5.671049  |
| C    | 9.023850  | 10.501783 | 7.181511  |
| H    | 9.555023  | 11.439805 | 7.014615  |
| C    | 14.232101 | 2.385254  | 6.393705  |
| H    | 14.278538 | 1.374669  | 5.973820  |
| C    | 9.817417  | 6.577987  | 9.650764  |
| C    | 10.670837 | 8.400660  | 12.360021 |
| H    | 10.068069 | 8.453795  | 11.448562 |
| C    | 8.718879  | 9.516061  | 6.216639  |
| H    | 8.969682  | 9.541404  | 5.155144  |
| C    | 12.748030 | 9.422599  | 6.289984  |
| H    | 11.859528 | 10.030839 | 6.038843  |
| H    | 13.592166 | 9.830449  | 5.696581  |
| C    | 16.959530 | 6.950677  | 10.905065 |
| H    | 18.049130 | 7.060288  | 10.894753 |
| C    | 11.829395 | 7.597698  | 12.392166 |
| C    | 10.287972 | 9.134525  | 13.494105 |
| H    | 9.387481  | 9.757166  | 13.459537 |
| C    | 13.088649 | 2.790130  | 7.100092  |
| H    | 12.252101 | 2.093957  | 7.222291  |
| C    | 8.036930  | 8.419241  | 6.898183  |
| H    | 7.690256  | 7.500246  | 6.422494  |
| O    | 8.768217  | 6.344679  | 10.147198 |
| C    | 11.867975 | 4.817884  | 11.501655 |
| H    | 12.499785 | 4.509355  | 12.353509 |
| H    | 10.835004 | 4.910535  | 11.882723 |
| C    | 16.135519 | 8.084492  | 10.792431 |
| H    | 16.580794 | 9.081423  | 10.703551 |
| C    | 11.933854 | 3.809490  | 10.339207 |
| H    | 11.240431 | 2.965558  | 10.495596 |
| H    | 12.944129 | 3.377785  | 10.241308 |
| C    | 13.013737 | 4.093777  | 7.639125  |
| C    | 12.603621 | 7.545472  | 13.573834 |
| H    | 13.516151 | 6.939861  | 13.608812 |

|   |           |           |           |
|---|-----------|-----------|-----------|
| C | 8.543039  | 10.017576 | 8.468882  |
| H | 8.647999  | 10.547783 | 9.417197  |
| C | 7.863552  | 8.774124  | 8.269261  |
| H | 7.384197  | 8.168136  | 9.036881  |
| C | 16.381511 | 5.679253  | 11.042487 |
| H | 17.017088 | 4.793042  | 11.144017 |
| C | 12.519847 | 7.976390  | 5.849698  |
| H | 13.419346 | 7.356379  | 6.014414  |
| H | 12.283272 | 7.941815  | 4.771932  |
| C | 14.104770 | 4.973282  | 7.472711  |
| H | 14.060461 | 5.977543  | 7.911270  |
| C | 14.148487 | 6.666897  | 10.942790 |
| C | 14.740609 | 7.945175  | 10.807617 |
| H | 14.103381 | 8.835012  | 10.743916 |
| C | 10.122421 | 3.750964  | 7.959906  |
| C | 9.970485  | 3.643613  | 6.557866  |
| H | 10.755269 | 4.013293  | 5.890698  |
| C | 9.092606  | 3.272845  | 8.800515  |
| H | 9.170333  | 3.366089  | 9.888968  |
| C | 7.808347  | 2.564477  | 6.858482  |
| H | 6.914552  | 2.096857  | 6.432018  |
| C | 7.945838  | 2.679319  | 8.251199  |
| H | 7.159765  | 2.305497  | 8.915833  |
| C | 8.820935  | 3.049553  | 6.014621  |
| H | 8.720854  | 2.961855  | 4.927360  |
| C | 13.082417 | 9.597530  | 7.770991  |
| H | 13.280908 | 10.661339 | 7.989724  |
| H | 13.982381 | 9.021332  | 8.053113  |

---

**Table S19.**  $[\text{CpNi}^{\text{I}}(\text{pdt})\text{Fe}^{\text{II}}(\text{dppe})(\text{CO})]^0$  in Cycle A with pdt Oriented Toward Ni ( $[\mathbf{1a}]^0$ ,  $-3204.37976648 E_h$ )

| atom | x         | y         | z         |
|------|-----------|-----------|-----------|
| Ni   | 2.427036  | 6.004331  | 2.118879  |
| Fe   | 1.588207  | 5.961511  | 4.502278  |
| S    | 0.975732  | 7.540924  | 2.984157  |
| P    | 2.627744  | 7.504127  | 5.753736  |
| O    | -0.868802 | 5.881075  | 6.064364  |
| C    | 4.561116  | 6.325510  | 1.826157  |
| H    | 5.249270  | 6.579572  | 2.633134  |
| C    | 3.863975  | 7.260232  | 0.995473  |
| H    | 3.886564  | 8.346118  | 1.093196  |
| C    | 3.061243  | 6.516002  | 0.070480  |
| H    | 2.394383  | 6.937405  | -0.684594 |
| C    | -0.723425 | 7.178498  | 2.312340  |
| H    | -1.422847 | 7.181838  | 3.168662  |
| H    | -0.970227 | 8.047455  | 1.675614  |
| C    | -0.856287 | 5.885180  | 1.504918  |
| H    | -0.142466 | 5.908047  | 0.659575  |
| H    | -1.878395 | 5.851592  | 1.070217  |
| C    | 0.166206  | 5.909646  | 5.486631  |
| C    | 3.070098  | 6.656885  | 7.370965  |
| C    | 5.468059  | 8.041438  | 5.784650  |
| H    | 5.547975  | 7.381509  | 6.655240  |
| C    | 6.633204  | 8.656598  | 5.291542  |
| H    | 7.596750  | 8.457566  | 5.774833  |
| C    | 6.559882  | 9.529982  | 4.196452  |
| H    | 7.466291  | 10.013015 | 3.814909  |
| C    | 5.314820  | 9.785503  | 3.594367  |
| H    | 5.247814  | 10.472741 | 2.743288  |
| C    | 4.154324  | 9.164799  | 4.077122  |
| H    | 3.188741  | 9.363275  | 3.597550  |
| C    | 2.429787  | 9.979139  | 7.139531  |
| H    | 3.507984  | 9.872105  | 7.305982  |
| C    | 1.733748  | 9.011518  | 6.380103  |
| C    | 0.354347  | 9.185933  | 6.152221  |
| H    | -0.191090 | 8.453397  | 5.553006  |
| C    | -0.318218 | 10.299777 | 6.682607  |
| H    | -1.390853 | 10.422935 | 6.494978  |
| C    | 0.378699  | 11.250978 | 7.442956  |
| H    | -0.147232 | 12.120190 | 7.854117  |
| C    | 1.755929  | 11.088559 | 7.670635  |
| H    | 2.308912  | 11.830197 | 8.258511  |
| H    | 3.730653  | 7.284280  | 7.997203  |
| H    | 4.741263  | 5.341374  | 6.852192  |
| H    | 2.105495  | 6.566198  | 7.902587  |
| S    | 1.086910  | 4.349431  | 2.968035  |
| C    | -0.638432 | 4.604429  | 2.314836  |
| H    | -1.331190 | 4.560838  | 3.175504  |
| H    | -0.836969 | 3.721085  | 1.680936  |
| C    | 3.670672  | 5.268430  | 7.107135  |
| C    | 4.178668  | 3.524913  | 4.810709  |
| C    | 5.428827  | 4.147704  | 4.598598  |



|   |           |          |           |
|---|-----------|----------|-----------|
| H | 5.597218  | 5.179228 | 4.929002  |
| C | 6.464521  | 3.469238 | 3.938455  |
| H | 7.430562  | 3.965651 | 3.792362  |
| C | 6.259989  | 2.165622 | 3.454878  |
| H | 7.067940  | 1.637361 | 2.936429  |
| C | 5.010843  | 1.549626 | 3.631832  |
| H | 4.836851  | 0.537483 | 3.249181  |
| C | 3.978178  | 2.221058 | 4.306926  |
| H | 3.012255  | 1.725995 | 4.447424  |
| C | 2.594546  | 2.200028 | 7.400060  |
| H | 3.658387  | 2.372413 | 7.601762  |
| C | 1.905121  | 3.022091 | 6.478446  |
| C | 0.551904  | 2.744819 | 6.204368  |
| H | 0.015279  | 3.357242 | 5.476132  |
| C | -0.104853 | 1.683708 | 6.851295  |
| H | -1.159228 | 1.485156 | 6.628452  |
| C | 0.583317  | 0.885003 | 7.776501  |
| H | 0.069390  | 0.059961 | 8.282702  |
| C | 1.938185  | 1.143310 | 8.047401  |
| H | 2.487111  | 0.517741 | 8.760623  |
| H | 3.590215  | 4.623558 | 7.998978  |
| C | 4.232011  | 4.996992 | 1.377608  |
| H | 4.601749  | 4.065548 | 1.806500  |
| C | 3.307684  | 5.117747 | 0.295858  |
| H | 2.834898  | 4.290533 | -0.237231 |
| C | 4.215389  | 8.283718 | 5.181823  |
| P | 2.786978  | 4.437343 | 5.644757  |

---

**Table S20.** [CpNi<sup>I</sup>(pdt)Fe<sup>II</sup>(dppe)(CO)]<sup>0</sup> in Cycle A with pdt Oriented Toward Fe ([1a]<sup>0</sup>, -3204.37814099 E<sub>h</sub>)

| atom | x         | y         | z         |
|------|-----------|-----------|-----------|
| Ni   | 2.441321  | 6.001201  | 2.157813  |
| Fe   | 1.562657  | 5.961024  | 4.517917  |
| S    | 0.977259  | 7.538793  | 2.980689  |
| P    | 2.621495  | 7.504762  | 5.745603  |
| O    | -0.749390 | 5.891834  | 6.295963  |
| C    | 4.591935  | 6.322925  | 1.804073  |
| H    | 5.305023  | 6.577629  | 2.589072  |
| C    | 3.864863  | 7.256764  | 1.000271  |
| H    | 3.891111  | 8.342817  | 1.095967  |
| C    | 3.028909  | 6.512419  | 0.103740  |
| H    | 2.338229  | 6.933406  | -0.629979 |
| C    | -0.666135 | 7.176356  | 2.172506  |
| H    | -1.320118 | 8.030175  | 2.427666  |
| H    | -0.490558 | 7.201104  | 1.081179  |
| C    | -1.340918 | 5.866190  | 2.581676  |
| H    | -2.341989 | 5.832511  | 2.101242  |
| H    | -1.514273 | 5.863359  | 3.672507  |
| C    | 0.209048  | 5.914780  | 5.598343  |
| C    | 3.057700  | 6.658588  | 7.364625  |
| C    | 5.461157  | 8.035697  | 5.784956  |
| H    | 5.535752  | 7.378819  | 6.658299  |
| C    | 6.629307  | 8.649109  | 5.296924  |
| H    | 7.589780  | 8.452030  | 5.787041  |
| C    | 6.562656  | 9.518115  | 4.197924  |
| H    | 7.471389  | 9.999846  | 3.820268  |
| C    | 5.321587  | 9.770772  | 3.586617  |
| H    | 5.260065  | 10.453939 | 2.731900  |
| C    | 4.158088  | 9.151671  | 4.064169  |
| H    | 3.195791  | 9.347102  | 3.576904  |
| C    | 2.423013  | 9.970631  | 7.145047  |
| H    | 3.496191  | 9.849494  | 7.333214  |
| C    | 1.731229  | 9.016993  | 6.364460  |
| C    | 0.359501  | 9.210054  | 6.107253  |
| H    | -0.179213 | 8.489039  | 5.487808  |
| C    | -0.310401 | 10.328593 | 6.630992  |
| H    | -1.377058 | 10.466931 | 6.421119  |
| C    | 0.381538  | 11.265370 | 7.413513  |
| H    | -0.142515 | 12.137980 | 7.819840  |
| C    | 1.751534  | 11.084624 | 7.669474  |
| H    | 2.300680  | 11.815427 | 8.274242  |
| H    | 3.720783  | 7.283264  | 7.990698  |
| H    | 4.724513  | 5.332602  | 6.856588  |
| H    | 2.091995  | 6.574133  | 7.895079  |
| S    | 1.088910  | 4.350253  | 2.968816  |
| C    | -0.582512 | 4.600640  | 2.177752  |
| H    | -1.178020 | 3.707682  | 2.442427  |
| H    | -0.414858 | 4.579672  | 1.084889  |
| C    | 3.651909  | 5.266367  | 7.104772  |
| C    | 4.171950  | 3.535316  | 4.802626  |
| C    | 5.416395  | 4.169657  | 4.592391  |

|   |           |          |           |
|---|-----------|----------|-----------|
| H | 5.571912  | 5.204903 | 4.917100  |
| C | 6.461495  | 3.497621 | 3.940749  |
| H | 7.423185  | 4.002649 | 3.795670  |
| C | 6.271453  | 2.189472 | 3.463454  |
| H | 7.086705  | 1.666212 | 2.951389  |
| C | 5.027503  | 1.562447 | 3.637792  |
| H | 4.864857  | 0.546847 | 3.259396  |
| C | 3.985485  | 2.227324 | 4.305037  |
| H | 3.023696  | 1.723883 | 4.443793  |
| C | 2.580265  | 2.195182 | 7.389023  |
| H | 3.640562  | 2.374864 | 7.602632  |
| C | 1.894673  | 3.013610 | 6.461503  |
| C | 0.546364  | 2.727317 | 6.172122  |
| H | 0.014600  | 3.337622 | 5.437983  |
| C | -0.109347 | 1.660339 | 6.810155  |
| H | -1.159883 | 1.454427 | 6.576061  |
| C | 0.574720  | 0.864957 | 7.741360  |
| H | 0.061335  | 0.035370 | 8.240630  |
| C | 1.924627  | 1.132470 | 8.027346  |
| H | 2.470323  | 0.509612 | 8.745380  |
| H | 3.561680  | 4.622793 | 7.996574  |
| C | 4.246155  | 4.995790 | 1.370942  |
| H | 4.629281  | 4.064235 | 1.787778  |
| C | 3.282919  | 5.114964 | 0.322206  |
| H | 2.794577  | 4.286816 | -0.195374 |
| C | 4.212601  | 8.275594 | 5.172850  |
| P | 2.774277  | 4.435933 | 5.638186  |

---

**Table S21.**  $[\text{CpNi}^{\text{I}}(\text{pdt})\text{Fe}^{\text{II}}(\text{dppe})(\text{CO})]^0$  in Cycle B with pdt Oriented Toward Ni ( $[\mathbf{1a}]^0$ ,  $-3204.37876445 E_{\text{h}}$ )

| atom | x         | y         | z         |
|------|-----------|-----------|-----------|
| Ni   | 10.355618 | 8.715226  | 7.626818  |
| Fe   | 11.483121 | 6.852139  | 8.785355  |
| P    | 13.212069 | 5.567964  | 9.280533  |
| S    | 12.204943 | 9.026626  | 8.928084  |
| P    | 10.915510 | 6.811888  | 10.958497 |
| S    | 11.555965 | 7.070642  | 6.491699  |
| C    | 7.545981  | 6.375246  | 13.357529 |
| H    | 7.338598  | 6.295279  | 14.430846 |
| C    | 6.492469  | 6.320642  | 12.428527 |
| H    | 5.460442  | 6.195549  | 12.775362 |
| C    | 16.538296 | 7.918852  | 10.090302 |
| H    | 16.789767 | 8.707367  | 10.808765 |
| C    | 12.473741 | 7.876470  | 13.144125 |
| H    | 12.896586 | 6.876036  | 13.284704 |
| C    | 17.475059 | 7.521430  | 9.120399  |
| H    | 18.463000 | 7.993950  | 9.082355  |
| C    | 9.400355  | 10.372801 | 6.558322  |
| H    | 9.928952  | 11.064034 | 5.898907  |
| C    | 17.133803 | 6.521206  | 8.197238  |
| H    | 17.854552 | 6.207329  | 7.433422  |
| C    | 10.371934 | 5.535373  | 8.516101  |
| C    | 8.089677  | 6.596501  | 10.611552 |
| H    | 8.302690  | 6.693708  | 9.543623  |
| C    | 8.765147  | 9.148194  | 6.164115  |
| H    | 8.782439  | 8.709655  | 5.165038  |
| C    | 13.362176 | 9.282093  | 6.289057  |
| H    | 12.489877 | 9.881516  | 5.965388  |
| H    | 14.248725 | 9.669836  | 5.743057  |
| C    | 12.350698 | 10.201439 | 13.856238 |
| H    | 12.671936 | 11.008929 | 14.523762 |
| C    | 9.152739  | 6.643703  | 11.534250 |
| C    | 6.766573  | 6.433804  | 11.057179 |
| H    | 5.949993  | 6.398459  | 10.327307 |
| C    | 15.869138 | 5.910157  | 8.248925  |
| H    | 15.621028 | 5.120772  | 7.531822  |
| C    | 8.200006  | 8.548239  | 7.330207  |
| H    | 7.653533  | 7.603816  | 7.359678  |
| O    | 9.608846  | 4.656045  | 8.309021  |
| C    | 11.653203 | 5.207337  | 11.614036 |
| H    | 11.597021 | 5.147293  | 12.716373 |
| H    | 10.996566 | 4.414755  | 11.210699 |
| C    | 11.396581 | 10.449858 | 12.854995 |
| H    | 10.972142 | 11.453143 | 12.736428 |
| C    | 13.090517 | 5.027279  | 11.101574 |
| H    | 13.422695 | 3.980492  | 11.211418 |
| H    | 13.795074 | 5.659117  | 11.669791 |
| C    | 14.925256 | 6.293999  | 9.225857  |
| C    | 8.866404  | 6.538593  | 12.914448 |
| H    | 9.678134  | 6.601165  | 13.648569 |
| C    | 9.161371  | 10.562784 | 7.964740  |

|   |           |           |           |
|---|-----------|-----------|-----------|
| H | 9.532836  | 11.393709 | 8.567329  |
| C | 8.439302  | 9.433732  | 8.447870  |
| H | 8.109702  | 9.268448  | 9.474851  |
| C | 12.888384 | 8.913479  | 13.998517 |
| H | 13.627518 | 8.707442  | 14.781347 |
| C | 13.145211 | 7.821848  | 5.890365  |
| H | 13.980384 | 7.190690  | 6.245760  |
| H | 13.100784 | 7.730902  | 4.789705  |
| C | 15.271092 | 7.318661  | 10.137051 |
| H | 14.537771 | 7.672221  | 10.871629 |
| C | 11.516580 | 8.114807  | 12.135551 |
| C | 10.986990 | 9.418556  | 11.998461 |
| H | 10.246282 | 9.621507  | 11.217275 |
| C | 13.454344 | 3.952160  | 8.389925  |
| C | 12.760019 | 3.693384  | 7.190630  |
| H | 12.090943 | 4.457271  | 6.780276  |
| C | 14.339904 | 2.969174  | 8.890950  |
| H | 14.917773 | 3.160198  | 9.802889  |
| C | 13.802467 | 1.497674  | 7.029846  |
| H | 13.932880 | 0.543881  | 6.505983  |
| C | 14.509605 | 1.750322  | 8.218253  |
| H | 15.197335 | 0.997982  | 8.621279  |
| C | 12.934055 | 2.472317  | 6.516382  |
| H | 12.382931 | 2.286039  | 5.587799  |
| C | 13.599421 | 9.489789  | 7.785446  |
| H | 13.781627 | 10.560136 | 7.991902  |
| H | 14.491244 | 8.931548  | 8.121790  |

---

**Table S22.**  $[\text{CpNi}^{\text{I}}(\text{pdt})\text{Fe}^{\text{II}}(\text{dppe})(\text{CO})]^0$  in Cycle B with pdt Oriented Toward Fe ( $[\mathbf{1a}]^0$ ,  $-3204.37350150 E_h$ )

| atom | x         | y         | z         |
|------|-----------|-----------|-----------|
| Ni   | 10.267441 | 8.881138  | 7.595412  |
| Fe   | 11.436435 | 6.729504  | 8.782279  |
| P    | 13.287988 | 5.516831  | 9.299823  |
| S    | 12.131492 | 8.939494  | 8.758362  |
| P    | 10.925912 | 6.747890  | 10.949665 |
| S    | 11.035075 | 7.114724  | 6.526076  |
| C    | 7.541099  | 6.370541  | 13.349601 |
| H    | 7.324529  | 6.301962  | 14.421959 |
| C    | 6.493325  | 6.324422  | 12.413579 |
| H    | 5.457178  | 6.217701  | 12.754407 |
| C    | 16.442068 | 8.051270  | 10.200992 |
| H    | 16.587019 | 8.912253  | 10.863954 |
| C    | 12.504357 | 7.883980  | 13.087958 |
| H    | 12.937862 | 6.891164  | 13.247618 |
| C    | 17.490041 | 7.612412  | 9.372979  |
| H    | 18.457519 | 8.126887  | 9.387201  |
| C    | 9.521723  | 10.794435 | 6.809274  |
| H    | 10.139148 | 11.548596 | 6.319439  |
| C    | 17.285056 | 6.512748  | 8.524782  |
| H    | 18.094145 | 6.162247  | 7.873214  |
| C    | 10.409133 | 5.333152  | 8.631349  |
| C    | 8.106857  | 6.558779  | 10.605445 |
| H    | 8.333528  | 6.641737  | 9.537419  |
| C    | 8.855751  | 9.707503  | 6.191365  |
| H    | 8.863281  | 9.461093  | 5.127860  |
| C    | 13.702615 | 8.165502  | 6.461897  |
| H    | 14.529877 | 8.491585  | 5.796568  |
| H    | 14.055503 | 7.261246  | 6.987335  |
| C    | 12.375040 | 10.227044 | 13.739051 |
| H    | 12.700872 | 11.054826 | 14.378901 |
| C    | 9.164419  | 6.597251  | 11.535844 |
| C    | 6.778140  | 6.421061  | 11.042771 |
| H    | 5.965492  | 6.389276  | 10.308111 |
| C    | 16.047067 | 5.848608  | 8.508085  |
| H    | 15.906383 | 4.988046  | 7.845722  |
| C    | 8.164468  | 8.941433  | 7.221663  |
| H    | 7.565970  | 8.046452  | 7.042544  |
| O    | 9.719600  | 4.377735  | 8.504505  |
| C    | 11.682936 | 5.165842  | 11.639291 |
| H    | 11.637002 | 5.133018  | 12.743586 |
| H    | 11.025137 | 4.361804  | 11.261927 |
| C    | 11.402124 | 10.440521 | 12.747402 |
| H    | 10.966227 | 11.436761 | 12.610804 |
| C    | 13.120402 | 4.972534  | 11.124218 |
| H    | 13.437047 | 3.920827  | 11.237336 |
| H    | 13.830195 | 5.592825  | 11.699001 |
| C    | 14.989437 | 6.273816  | 9.342264  |
| C    | 8.867209  | 6.509358  | 12.914290 |
| H    | 9.675438  | 6.564370  | 13.653075 |
| C    | 9.302785  | 10.664899 | 8.232067  |

|   |           |           |           |
|---|-----------|-----------|-----------|
| H | 9.723477  | 11.321976 | 8.996264  |
| C | 8.399604  | 9.568788  | 8.474639  |
| H | 8.027783  | 9.241419  | 9.446001  |
| C | 12.924679 | 8.947286  | 13.906601 |
| H | 13.679046 | 8.768230  | 14.681535 |
| C | 12.496907 | 7.806028  | 5.596796  |
| H | 12.774247 | 7.020740  | 4.869271  |
| H | 12.131508 | 8.681663  | 5.028529  |
| C | 15.202007 | 7.395633  | 10.180100 |
| H | 14.387400 | 7.769169  | 10.812651 |
| C | 11.529528 | 8.086594  | 12.087751 |
| C | 10.987240 | 9.382631  | 11.926817 |
| H | 10.230069 | 9.557053  | 11.154106 |
| C | 13.596355 | 3.906068  | 8.419233  |
| C | 12.936234 | 3.666668  | 7.196479  |
| H | 12.254320 | 4.428283  | 6.801392  |
| C | 14.470043 | 2.915995  | 8.924800  |
| H | 15.015460 | 3.089717  | 9.860037  |
| C | 13.997820 | 1.484078  | 7.014682  |
| H | 14.149445 | 0.542851  | 6.474002  |
| C | 14.667245 | 1.713442  | 8.229446  |
| H | 15.346348 | 0.954699  | 8.635447  |
| C | 13.135695 | 2.463437  | 6.498514  |
| H | 12.608455 | 2.290751  | 5.553405  |
| C | 13.452230 | 9.274879  | 7.484905  |
| H | 13.169769 | 10.220867 | 6.986618  |
| H | 14.372381 | 9.455446  | 8.069031  |

---

**Table S23.**  $[\text{CpNi}^{\text{I}}(\text{pdt})\text{Fe}^{\text{II}}(\text{dppe})(\text{CO})]^0$  Transition State with pdt Oriented Toward Ni ( $[\mathbf{1a}]^0$ ,  $-3204.36221151 E_{\text{h}}$ )

| atom | x         | y         | z         |
|------|-----------|-----------|-----------|
| Ni   | 10.112252 | 8.666263  | 6.812686  |
| Fe   | 11.466957 | 7.033514  | 8.945521  |
| P    | 12.110353 | 7.144118  | 11.082137 |
| S    | 10.875819 | 9.298471  | 8.771078  |
| P    | 9.536081  | 6.064507  | 9.618858  |
| S    | 11.882235 | 7.379888  | 6.628355  |
| C    | 8.062952  | 2.286833  | 8.566730  |
| H    | 7.678618  | 1.393865  | 9.073213  |
| C    | 8.162623  | 2.315427  | 7.166558  |
| H    | 7.856494  | 1.444557  | 6.575897  |
| C    | 11.591339 | 10.926415 | 12.765214 |
| H    | 10.745128 | 11.577574 | 13.012755 |
| C    | 7.954621  | 8.292700  | 10.381377 |
| H    | 8.909385  | 8.829900  | 10.391936 |
| C    | 12.906747 | 11.363394 | 12.988476 |
| H    | 13.094075 | 12.356095 | 13.413048 |
| C    | 9.453732  | 9.440969  | 4.823330  |
| H    | 10.121685 | 9.687749  | 3.996289  |
| C    | 13.979710 | 10.517995 | 12.663153 |
| H    | 15.011440 | 10.846527 | 12.834034 |
| C    | 12.127798 | 5.441630  | 8.720776  |
| C    | 9.071559  | 4.569735  | 7.285728  |
| H    | 9.494264  | 5.451969  | 6.790678  |
| C    | 8.953836  | 8.107865  | 5.135565  |
| H    | 9.162760  | 7.209636  | 4.550367  |
| C    | 13.043574 | 9.983037  | 7.025200  |
| H    | 12.320082 | 10.401006 | 6.299478  |
| H    | 13.978701 | 10.576312 | 6.935628  |
| C    | 5.535178  | 8.313415  | 10.658240 |
| H    | 4.612518  | 8.843953  | 10.919597 |
| C    | 8.965350  | 4.558449  | 8.693525  |
| C    | 8.667743  | 3.459857  | 6.527811  |
| H    | 8.761848  | 3.483910  | 5.436188  |
| C    | 13.739507 | 9.243593  | 12.125483 |
| H    | 14.586913 | 8.591604  | 11.888350 |
| C    | 8.093274  | 8.189264  | 6.276509  |
| H    | 7.540004  | 7.371806  | 6.738950  |
| O    | 12.568530 | 4.362480  | 8.513995  |
| C    | 9.942741  | 5.355979  | 11.329133 |
| H    | 9.029823  | 5.045583  | 11.868939 |
| H    | 10.566549 | 4.459222  | 11.155333 |
| C    | 5.486626  | 6.972976  | 10.242369 |
| H    | 4.524201  | 6.452170  | 10.176169 |
| C    | 10.719247 | 6.405008  | 12.141283 |
| H    | 11.108731 | 5.973449  | 13.080244 |
| H    | 10.047456 | 7.237682  | 12.417737 |
| C    | 12.419983 | 8.787624  | 11.903562 |
| C    | 8.458795  | 3.401068  | 9.325343  |
| H    | 8.372616  | 3.360286  | 10.416768 |
| C    | 8.987511  | 10.313997 | 5.822597  |



|   |           |           |           |
|---|-----------|-----------|-----------|
| H | 9.219762  | 11.375625 | 5.924548  |
| C | 8.188623  | 9.531213  | 6.759132  |
| H | 7.703140  | 9.921288  | 7.655462  |
| C | 6.773548  | 8.971886  | 10.724821 |
| H | 6.823201  | 10.022470 | 11.034256 |
| C | 13.357011 | 8.535716  | 6.636627  |
| H | 14.110349 | 8.095242  | 7.314505  |
| H | 13.762635 | 8.502665  | 5.609312  |
| C | 11.350171 | 9.654951  | 12.221382 |
| H | 10.316008 | 9.342367  | 12.045249 |
| C | 7.921035  | 6.938306  | 9.980434  |
| C | 6.667522  | 6.290528  | 9.907201  |
| H | 6.610498  | 5.246355  | 9.582139  |
| C | 13.619535 | 6.203431  | 11.647383 |
| C | 14.610618 | 5.861110  | 10.704767 |
| H | 14.456240 | 6.119215  | 9.651677  |
| C | 13.836070 | 5.873338  | 13.004408 |
| H | 13.103159 | 6.162027  | 13.766396 |
| C | 15.972757 | 4.849534  | 12.448451 |
| H | 16.880045 | 4.318771  | 12.758558 |
| C | 14.998822 | 5.196007  | 13.400746 |
| H | 15.147150 | 4.942729  | 14.456854 |
| C | 15.779407 | 5.189502  | 11.101046 |
| H | 16.534561 | 4.926467  | 10.351772 |
| C | 12.494609 | 10.169851 | 8.442848  |
| H | 12.306392 | 11.241336 | 8.634523  |
| H | 13.211117 | 9.810146  | 9.203392  |

---

**Table S24.**  $[\text{CpNi}^{\text{I}}(\text{pdt})\text{Fe}^{\text{I}}(\text{dppe})(\text{CO})]^-$  in Cycle A with pdt Oriented Toward Ni ( $[\mathbf{1a}]^-$ ,  $-3204.41087145 E_{\text{h}}$ )

| atom | x         | y         | z         |
|------|-----------|-----------|-----------|
| Ni   | 2.425506  | 5.998244  | 2.007580  |
| Fe   | 1.557297  | 5.969306  | 4.577002  |
| S    | 1.043390  | 7.551304  | 2.950210  |
| P    | 2.609388  | 7.470217  | 5.790091  |
| O    | -0.958394 | 5.904422  | 6.096925  |
| C    | 4.553784  | 6.319355  | 1.592047  |
| H    | 5.255465  | 6.585545  | 2.383935  |
| C    | 3.841808  | 7.239277  | 0.753459  |
| H    | 3.864025  | 8.328408  | 0.834521  |
| C    | 3.047447  | 6.484400  | -0.169551 |
| H    | 2.368072  | 6.898010  | -0.919407 |
| C    | -0.697496 | 7.194360  | 2.386745  |
| H    | -1.347580 | 7.192419  | 3.282905  |
| H    | -0.995068 | 8.052819  | 1.754486  |
| C    | -0.874820 | 5.891543  | 1.597518  |
| H    | -0.194406 | 5.906194  | 0.723805  |
| H    | -1.917859 | 5.859594  | 1.207640  |
| C    | 0.081114  | 5.927198  | 5.508810  |
| C    | 3.038481  | 6.643097  | 7.429811  |
| C    | 5.448460  | 8.093726  | 5.955717  |
| H    | 5.488719  | 7.518821  | 6.887906  |
| C    | 6.633072  | 8.673764  | 5.467565  |
| H    | 7.570999  | 8.537451  | 6.020877  |
| C    | 6.614578  | 9.431966  | 4.286270  |
| H    | 7.536982  | 9.886404  | 3.905287  |
| C    | 5.401237  | 9.596548  | 3.591771  |
| H    | 5.375336  | 10.180600 | 2.663986  |
| C    | 4.223406  | 9.005741  | 4.068071  |
| H    | 3.288547  | 9.116501  | 3.505711  |
| C    | 2.416781  | 9.954870  | 7.212008  |
| H    | 3.485216  | 9.823090  | 7.421762  |
| C    | 1.739567  | 9.007625  | 6.413127  |
| C    | 0.376712  | 9.214458  | 6.122891  |
| H    | -0.144587 | 8.489109  | 5.492314  |
| C    | -0.297516 | 10.338888 | 6.630095  |
| H    | -1.357403 | 10.488031 | 6.390725  |
| C    | 0.381582  | 11.269744 | 7.432857  |
| H    | -0.145762 | 12.147354 | 7.827299  |
| C    | 1.742550  | 11.075648 | 7.723551  |
| H    | 2.282775  | 11.801052 | 8.344881  |
| H    | 3.691002  | 7.267786  | 8.068883  |
| H    | 4.715524  | 5.345887  | 6.895616  |
| H    | 2.066747  | 6.543954  | 7.946272  |
| S    | 1.138915  | 4.353572  | 2.953945  |
| C    | -0.623004 | 4.610080  | 2.402320  |
| H    | -1.267673 | 4.588444  | 3.302081  |
| H    | -0.878339 | 3.729543  | 1.781883  |
| C    | 3.645290  | 5.260500  | 7.152165  |
| C    | 4.176168  | 3.564750  | 4.846278  |
| C    | 5.377001  | 4.256728  | 4.562601  |

|   |           |          |           |
|---|-----------|----------|-----------|
| H | 5.478401  | 5.311582 | 4.844294  |
| C | 6.434273  | 3.623492 | 3.894123  |
| H | 7.357785  | 4.179693 | 3.692835  |
| C | 6.303488  | 2.291199 | 3.461901  |
| H | 7.126431  | 1.798857 | 2.929889  |
| C | 5.100253  | 1.606815 | 3.698844  |
| H | 4.977144  | 0.573633 | 3.350789  |
| C | 4.047461  | 2.235713 | 4.384173  |
| H | 3.116307  | 1.689025 | 4.564186  |
| C | 2.579991  | 2.182102 | 7.396965  |
| H | 3.645199  | 2.350201 | 7.597265  |
| C | 1.897470  | 3.014405 | 6.479951  |
| C | 0.542956  | 2.744127 | 6.205433  |
| H | 0.016335  | 3.379078 | 5.487659  |
| C | -0.118342 | 1.677569 | 6.839000  |
| H | -1.173241 | 1.483042 | 6.610830  |
| C | 0.565568  | 0.866465 | 7.759981  |
| H | 0.047408  | 0.037624 | 8.258232  |
| C | 1.919197  | 1.120208 | 8.036762  |
| H | 2.464899  | 0.487637 | 8.748274  |
| H | 3.566806  | 4.597625 | 8.032749  |
| C | 4.202832  | 4.989733 | 1.178262  |
| H | 4.570516  | 4.062620 | 1.620959  |
| C | 3.273745  | 5.097159 | 0.091352  |
| H | 2.787284  | 4.259637 | -0.415175 |
| C | 4.223646  | 8.249909 | 5.266922  |
| P | 2.754480  | 4.466454 | 5.659336  |

---

**Table S25.** [CpNi<sup>I</sup>(pdt)Fe<sup>I</sup>(dppe)(CO)]<sup>-</sup> in Cycle A with pdt Oriented Toward Fe ([**1a**]<sup>-</sup>, -3204.40706696 E<sub>h</sub>)

| atom | x         | y         | z         |
|------|-----------|-----------|-----------|
| Ni   | 10.410532 | 8.648857  | 7.356811  |
| Fe   | 11.803418 | 6.711890  | 8.773338  |
| P    | 11.414786 | 6.759169  | 10.938595 |
| S    | 12.097277 | 9.044302  | 8.856538  |
| P    | 10.593560 | 4.860355  | 8.731470  |
| S    | 11.663863 | 6.963443  | 6.482931  |
| C    | 10.683791 | 1.150964  | 6.797510  |
| H    | 10.050350 | 0.256143  | 6.750140  |
| C    | 11.894116 | 1.197843  | 6.085469  |
| H    | 12.210302 | 0.339367  | 5.479679  |
| C    | 8.235837  | 9.332102  | 11.625085 |
| H    | 7.445243  | 9.780015  | 11.011320 |
| C    | 7.799229  | 4.451176  | 9.437882  |
| H    | 8.127733  | 4.097160  | 10.421514 |
| C    | 8.279540  | 9.574010  | 13.007659 |
| H    | 7.521024  | 10.209631 | 13.481427 |
| C    | 9.584265  | 10.709659 | 6.738283  |
| H    | 10.195549 | 11.615298 | 6.764603  |
| C    | 9.303748  | 9.002366  | 13.782235 |
| H    | 9.346957  | 9.188902  | 14.862860 |
| C    | 13.369860 | 5.947309  | 8.958519  |
| C    | 12.287910 | 3.453700  | 6.920561  |
| H    | 12.899397 | 4.359306  | 6.963530  |
| C    | 9.449078  | 9.814800  | 5.633437  |
| H    | 9.925296  | 9.919668  | 4.655145  |
| C    | 14.128978 | 8.433031  | 6.895300  |
| H    | 15.013903 | 8.852149  | 6.364699  |
| H    | 14.505260 | 7.630413  | 7.552975  |
| C    | 5.963299  | 4.953992  | 7.916116  |
| H    | 4.888291  | 5.006430  | 7.706059  |
| C    | 11.078034 | 3.414942  | 7.642705  |
| C    | 12.693060 | 2.351334  | 6.148384  |
| H    | 13.634527 | 2.400044  | 5.587792  |
| C    | 10.275749 | 8.190580  | 13.175630 |
| H    | 11.074874 | 7.753015  | 13.785177 |
| C    | 8.596696  | 8.735095  | 6.040484  |
| H    | 8.310972  | 7.880883  | 5.423043  |
| O    | 14.433323 | 5.418886  | 9.070023  |
| C    | 10.795706 | 4.052533  | 10.430033 |
| H    | 10.106016 | 3.199153  | 10.572994 |
| H    | 11.824616 | 3.649066  | 10.421765 |
| C    | 6.899271  | 5.330027  | 6.933578  |
| H    | 6.554559  | 5.678304  | 5.952447  |
| C    | 10.633033 | 5.122220  | 11.518827 |
| H    | 11.042732 | 4.806328  | 12.496467 |
| H    | 9.564109  | 5.354477  | 11.673952 |
| C    | 10.236769 | 7.941440  | 11.786061 |
| C    | 10.278332 | 2.253187  | 7.567917  |
| H    | 9.323078  | 2.218014  | 8.105288  |
| C    | 8.821559  | 10.183409 | 7.831125  |

|   |           |           |           |
|---|-----------|-----------|-----------|
| H | 8.750027  | 10.628302 | 8.826069  |
| C | 8.210374  | 8.957127  | 7.402626  |
| H | 7.543571  | 8.320861  | 7.988212  |
| C | 6.420885  | 4.519948  | 9.170753  |
| H | 5.703671  | 4.223916  | 9.946897  |
| C | 13.194360 | 7.829367  | 5.840944  |
| H | 13.753641 | 7.085546  | 5.240752  |
| H | 12.833031 | 8.616574  | 5.151502  |
| C | 9.209619  | 8.522303  | 11.015728 |
| H | 9.197399  | 8.350117  | 9.930577  |
| C | 8.749896  | 4.825355  | 8.460289  |
| C | 8.272647  | 5.278747  | 7.204552  |
| H | 8.992625  | 5.601704  | 6.443507  |
| C | 12.922614 | 6.951942  | 12.007868 |
| C | 13.468402 | 8.243646  | 12.201899 |
| H | 12.954145 | 9.111646  | 11.775064 |
| C | 13.619894 | 5.842127  | 12.529960 |
| H | 13.239955 | 4.827303  | 12.364869 |
| C | 15.341598 | 7.300760  | 13.444811 |
| H | 16.276280 | 7.435649  | 14.002731 |
| C | 14.815727 | 6.013378  | 13.246658 |
| H | 15.340522 | 5.135806  | 13.643811 |
| C | 14.665742 | 8.412656  | 12.914407 |
| H | 15.073226 | 9.421578  | 13.054426 |
| C | 13.522471 | 9.545222  | 7.757038  |
| H | 13.153490 | 10.370017 | 7.117264  |
| H | 14.306075 | 9.956375  | 8.422260  |

---

**Table S26.**  $[\text{CpNi}^{\text{III}}(\text{pdt})\text{Fe}^{\text{II}}(\text{dppe})(\text{CO})]^{2+}$  in Cycle A with pdt Oriented Toward Ni ( $[\mathbf{1a}]^{2+}$ ,  $-3203.88969329 E_{\text{h}}$ )

| atom | x         | y         | z         |
|------|-----------|-----------|-----------|
| Ni   | 10.262166 | 8.706945  | 7.461582  |
| Fe   | 11.519647 | 6.919971  | 8.753215  |
| P    | 11.241399 | 6.810031  | 11.104792 |
| S    | 11.898147 | 9.150931  | 8.856414  |
| P    | 10.524108 | 4.797063  | 8.733090  |
| S    | 11.385341 | 7.082263  | 6.499479  |
| C    | 11.098703 | 1.144697  | 6.938001  |
| H    | 10.536833 | 0.208308  | 6.860020  |
| C    | 12.368705 | 1.259368  | 6.346144  |
| H    | 12.798601 | 0.409940  | 5.805661  |
| C    | 8.099892  | 9.272133  | 12.119785 |
| H    | 7.046263  | 9.368780  | 11.836110 |
| C    | 7.682770  | 4.894698  | 9.085683  |
| H    | 7.847202  | 4.856431  | 10.166750 |
| C    | 8.640089  | 10.103060 | 13.118651 |
| H    | 8.009308  | 10.853425 | 13.606076 |
| C    | 9.303165  | 10.590799 | 7.203014  |
| H    | 9.791188  | 11.559742 | 7.322290  |
| C    | 9.984122  | 9.960231  | 13.498197 |
| H    | 10.404101 | 10.595283 | 14.284840 |
| C    | 13.194720 | 6.415417  | 8.836930  |
| C    | 12.534307 | 3.554494  | 7.136745  |
| H    | 13.103780 | 4.484450  | 7.206261  |
| C    | 9.184418  | 9.846043  | 6.002635  |
| H    | 9.553954  | 10.130848 | 5.016450  |
| C    | 13.250501 | 9.264373  | 6.314047  |
| H    | 12.454874 | 9.916328  | 5.909525  |
| H    | 14.195616 | 9.582934  | 5.829158  |
| C    | 6.113049  | 4.927083  | 7.222741  |
| H    | 5.082976  | 4.938486  | 6.851964  |
| C    | 11.261289 | 3.445290  | 7.734708  |
| C    | 13.083649 | 2.463272  | 6.444485  |
| H    | 14.071699 | 2.556328  | 5.982273  |
| C    | 10.796092 | 8.990297  | 12.887768 |
| H    | 11.833607 | 8.872002  | 13.213141 |
| C    | 8.497322  | 8.607492  | 6.329442  |
| H    | 8.271447  | 7.804972  | 5.625826  |
| O    | 14.333111 | 6.152634  | 8.845185  |
| C    | 10.539522 | 4.147854  | 10.488691 |
| H    | 9.809308  | 3.323970  | 10.583777 |
| H    | 11.544485 | 3.708125  | 10.623278 |
| C    | 7.188568  | 4.888823  | 6.316705  |
| H    | 6.997346  | 4.855740  | 5.238712  |
| C    | 10.278278 | 5.260907  | 11.510012 |
| H    | 10.503133 | 4.939030  | 12.542250 |
| H    | 9.220733  | 5.573703  | 11.510656 |
| C    | 10.259787 | 8.154627  | 11.884128 |
| C    | 10.540604 | 2.230459  | 7.626827  |
| H    | 9.543316  | 2.131820  | 8.069488  |
| C    | 8.672524  | 9.825572  | 8.275309  |

|   |           |           |           |
|---|-----------|-----------|-----------|
| H | 8.618353  | 10.134602 | 9.320583  |
| C | 8.132471  | 8.628700  | 7.717948  |
| H | 7.586324  | 7.844765  | 8.243184  |
| C | 6.362668  | 4.924676  | 8.605642  |
| H | 5.528796  | 4.923665  | 9.315403  |
| C | 12.996695 | 7.815452  | 5.889255  |
| H | 13.802629 | 7.138875  | 6.220951  |
| H | 12.924131 | 7.747787  | 4.790272  |
| C | 8.906159  | 8.308679  | 11.497037 |
| H | 8.475770  | 7.666050  | 10.718822 |
| C | 8.769327  | 4.861141  | 8.181303  |
| C | 8.509438  | 4.859741  | 6.788509  |
| H | 9.337781  | 4.793682  | 6.074567  |
| C | 12.852218 | 6.713407  | 11.974979 |
| C | 13.761388 | 7.793330  | 11.856273 |
| H | 13.492908 | 8.678883  | 11.268402 |
| C | 13.222462 | 5.580540  | 12.733890 |
| H | 12.548831 | 4.725454  | 12.844637 |
| C | 15.362689 | 6.616899  | 13.259989 |
| H | 16.335051 | 6.579579  | 13.761319 |
| C | 14.473565 | 5.536540  | 13.370013 |
| H | 14.748068 | 4.654663  | 13.957616 |
| C | 15.003359 | 7.746741  | 12.504572 |
| H | 15.692278 | 8.593446  | 12.419638 |
| C | 13.412066 | 9.516118  | 7.815647  |
| H | 13.613591 | 10.585123 | 8.001169  |
| H | 14.242475 | 8.931362  | 8.247331  |

---

**Table S27.**  $[\text{CpNi}^{\text{III}}(\text{pdt})\text{Fe}^{\text{II}}(\text{dppe})(\text{CO})]^{2+}$  in Cycle A with pdt Oriented Toward Fe ( $[\mathbf{1a}]^{2+}$ ,  $-3203.88593808 E_{\text{h}}$ )

| atom | x         | y         | z         |
|------|-----------|-----------|-----------|
| Ni   | 10.273744 | 8.686062  | 7.511060  |
| Fe   | 11.582654 | 6.897311  | 8.753160  |
| P    | 11.254326 | 6.813773  | 11.104627 |
| S    | 11.955462 | 9.134576  | 8.839949  |
| P    | 10.526985 | 4.801665  | 8.712185  |
| S    | 11.388536 | 7.095062  | 6.501880  |
| C    | 11.155897 | 1.119166  | 7.004479  |
| H    | 10.633977 | 0.156816  | 6.997304  |
| C    | 12.371554 | 1.270342  | 6.314467  |
| H    | 12.799679 | 0.422914  | 5.769478  |
| C    | 8.107450  | 9.269514  | 12.131601 |
| H    | 7.046244  | 9.348602  | 11.871946 |
| C    | 7.683936  | 4.897164  | 9.049782  |
| H    | 7.842253  | 4.873310  | 10.132233 |
| C    | 8.663487  | 10.129772 | 13.096383 |
| H    | 8.036858  | 10.884676 | 13.582156 |
| C    | 9.331994  | 10.578913 | 7.269474  |
| H    | 9.833237  | 11.541250 | 7.387758  |
| C    | 10.018565 | 10.010785 | 13.443707 |
| H    | 10.451772 | 10.669176 | 14.203508 |
| C    | 13.213729 | 6.256997  | 8.915650  |
| C    | 12.486792 | 3.596563  | 7.018617  |
| H    | 13.012023 | 4.554929  | 7.012829  |
| C    | 9.196574  | 9.838391  | 6.068178  |
| H    | 9.564214  | 10.121027 | 5.080637  |
| C    | 13.905365 | 8.536023  | 6.758819  |
| H    | 14.692447 | 9.019700  | 6.144968  |
| H    | 14.416743 | 7.747596  | 7.333604  |
| C    | 6.124896  | 4.898270  | 7.177714  |
| H    | 5.096874  | 4.900029  | 6.801157  |
| C    | 11.270817 | 3.449750  | 7.718177  |
| C    | 13.033061 | 2.508079  | 6.319385  |
| H    | 13.977279 | 2.629560  | 5.778780  |
| C    | 10.824816 | 9.034379  | 12.836464 |
| H    | 11.870998 | 8.933981  | 13.139031 |
| C    | 8.491043  | 8.610235  | 6.396371  |
| H    | 8.249209  | 7.812353  | 5.692721  |
| O    | 14.297602 | 5.838988  | 9.031528  |
| C    | 10.536858 | 4.158201  | 10.469652 |
| H    | 9.805044  | 3.335983  | 10.565768 |
| H    | 11.540674 | 3.718323  | 10.611864 |
| C    | 7.205454  | 4.855502  | 6.278194  |
| H    | 7.020744  | 4.810003  | 5.199577  |
| C    | 10.268828 | 5.273793  | 11.486682 |
| H    | 10.470368 | 4.947141  | 12.522068 |
| H    | 9.214453  | 5.595821  | 11.468609 |
| C    | 10.272140 | 8.167958  | 11.867853 |
| C    | 10.600830 | 2.201587  | 7.700580  |
| H    | 9.643240  | 2.073882  | 8.217602  |
| C    | 8.694205  | 9.821768  | 8.342756  |



|   |           |           |           |
|---|-----------|-----------|-----------|
| H | 8.649571  | 10.129649 | 9.388656  |
| C | 8.133270  | 8.635674  | 7.785712  |
| H | 7.580145  | 7.857733  | 8.312230  |
| C | 6.366609  | 4.913146  | 8.562006  |
| H | 5.528668  | 4.915543  | 9.266959  |
| C | 12.910723 | 7.909254  | 5.780214  |
| H | 13.402553 | 7.112632  | 5.194772  |
| H | 12.509663 | 8.649781  | 5.065755  |
| C | 8.908063  | 8.300224  | 11.510773 |
| H | 8.465027  | 7.639107  | 10.756007 |
| C | 8.775314  | 4.858490  | 8.151528  |
| C | 8.523759  | 4.837955  | 6.757692  |
| H | 9.356280  | 4.768042  | 6.049085  |
| C | 12.845435 | 6.706592  | 12.009698 |
| C | 13.785061 | 7.757092  | 11.867199 |
| H | 13.555012 | 8.620544  | 11.232186 |
| C | 13.167766 | 5.599219  | 12.825768 |
| H | 12.470593 | 4.766228  | 12.956380 |
| C | 15.321176 | 6.603790  | 13.359846 |
| H | 16.280315 | 6.563739  | 13.885825 |
| C | 14.401855 | 5.551873  | 13.493968 |
| H | 14.639484 | 4.689451  | 14.124902 |
| C | 15.009530 | 7.708089  | 12.547656 |
| H | 15.722675 | 8.532161  | 12.442552 |
| C | 13.368817 | 9.609087  | 7.707895  |
| H | 12.998181 | 10.495664 | 7.163541  |
| H | 14.169822 | 9.945942  | 8.389084  |

---

**Table S28.**  $[\text{CpNi}^{\text{III}}(\text{pdt})\text{HFe}^{\text{II}}(\text{dppe})(\text{CO})]^+$  in Cycle A with pdt Oriented Toward Ni ( $[\text{H1a}]^+$ ,  $-3204.79612707 E_{\text{h}}$ )

| atom | x         | y         | z         |
|------|-----------|-----------|-----------|
| Ni   | 2.523314  | 5.994772  | 2.044962  |
| Fe   | 1.735917  | 5.969888  | 4.520335  |
| S    | 1.135799  | 7.505895  | 2.905084  |
| P    | 2.665693  | 7.527218  | 5.848970  |
| O    | -0.832560 | 5.880103  | 5.959476  |
| C    | 4.632773  | 6.204597  | 1.500013  |
| H    | 5.417140  | 6.375151  | 2.236683  |
| C    | 3.832640  | 7.212716  | 0.876185  |
| H    | 3.932736  | 8.289058  | 1.021163  |
| C    | 2.895367  | 6.565849  | -0.027804 |
| H    | 2.167760  | 7.075335  | -0.660855 |
| C    | -0.595558 | 7.155533  | 2.327350  |
| H    | -1.237322 | 7.161462  | 3.227180  |
| H    | -0.872175 | 8.021249  | 1.700794  |
| C    | -0.778895 | 5.856013  | 1.538497  |
| H    | -0.150238 | 5.879211  | 0.628976  |
| H    | -1.833271 | 5.810419  | 1.198401  |
| C    | 0.208097  | 5.910544  | 5.412489  |
| C    | 3.096924  | 6.646685  | 7.444955  |
| C    | 5.494734  | 8.059142  | 5.860635  |
| H    | 5.580412  | 7.399315  | 6.730205  |
| C    | 6.656491  | 8.677351  | 5.363925  |
| H    | 7.621270  | 8.480232  | 5.843965  |
| C    | 6.577431  | 9.555768  | 4.273043  |
| H    | 7.481047  | 10.044593 | 3.893726  |
| C    | 5.329339  | 9.819825  | 3.680970  |
| H    | 5.257104  | 10.525398 | 2.845638  |
| C    | 4.170186  | 9.199167  | 4.168991  |
| H    | 3.199902  | 9.424327  | 3.710835  |
| C    | 2.365449  | 9.967169  | 7.233357  |
| H    | 3.432855  | 9.865930  | 7.460364  |
| C    | 1.713223  | 9.001269  | 6.431935  |
| C    | 0.348026  | 9.170712  | 6.126415  |
| H    | -0.168214 | 8.437531  | 5.501843  |
| C    | -0.357621 | 10.279865 | 6.621590  |
| H    | -1.418383 | 10.400597 | 6.376976  |
| C    | 0.293670  | 11.228040 | 7.424739  |
| H    | -0.257335 | 12.092495 | 7.810205  |
| C    | 1.656680  | 11.069982 | 7.729703  |
| H    | 2.171583  | 11.810438 | 8.351217  |
| H    | 3.742815  | 7.271091  | 8.088297  |
| H    | 4.785902  | 5.367691  | 6.877421  |
| H    | 2.130687  | 6.532007  | 7.969573  |
| S    | 1.267956  | 4.372538  | 2.911630  |
| C    | -0.487051 | 4.581730  | 2.336149  |
| H    | -1.125837 | 4.529543  | 3.236716  |
| H    | -0.694021 | 3.692542  | 1.715459  |
| C    | 3.724601  | 5.272850  | 7.162285  |
| C    | 4.185677  | 3.512948  | 4.845613  |
| C    | 5.394607  | 4.173804  | 4.530022  |

|   |           |          |           |
|---|-----------|----------|-----------|
| H | 5.550839  | 5.217964 | 4.827054  |
| C | 6.408548  | 3.505810 | 3.826469  |
| H | 7.350327  | 4.022178 | 3.609567  |
| C | 6.219475  | 2.177117 | 3.406095  |
| H | 7.012862  | 1.655396 | 2.860212  |
| C | 5.012469  | 1.521259 | 3.695725  |
| H | 4.857293  | 0.485931 | 3.373476  |
| C | 4.001597  | 2.181778 | 4.414752  |
| H | 3.072208  | 1.653664 | 4.649659  |
| C | 2.531326  | 2.243803 | 7.522250  |
| H | 3.579823  | 2.420540 | 7.788058  |
| C | 1.893651  | 3.046792 | 6.546827  |
| C | 0.559913  | 2.758687 | 6.194297  |
| H | 0.057236  | 3.357273 | 5.430638  |
| C | -0.131789 | 1.706124 | 6.816928  |
| H | -1.170046 | 1.499257 | 6.536380  |
| C | 0.503389  | 0.927656 | 7.795716  |
| H | -0.037363 | 0.110388 | 8.284606  |
| C | 1.838525  | 1.195701 | 8.144138  |
| H | 2.344116  | 0.584979 | 8.899774  |
| H | 3.682218  | 4.628832 | 8.056816  |
| C | 4.119003  | 4.937915 | 1.090686  |
| H | 4.468231  | 3.962201 | 1.432292  |
| C | 3.066745  | 5.168997 | 0.110139  |
| H | 2.491124  | 4.390696 | -0.393093 |
| C | 4.240110  | 8.307118 | 5.264586  |
| P | 2.832016  | 4.418676 | 5.731836  |
| H | 3.136123  | 6.048236 | 3.738760  |

---

**Table S29.** [CpNi<sup>III</sup>(pdt)HFe<sup>II</sup>(dppe)(CO)]<sup>+</sup> in Cycle A with pdt Oriented Toward Fe ([H1a]<sup>+</sup>, -3204.79478996 E<sub>h</sub>)

| atom | x         | y         | z         |
|------|-----------|-----------|-----------|
| Ni   | 10.093192 | 8.677953  | 7.623824  |
| Fe   | 11.529079 | 6.860436  | 8.806726  |
| P    | 11.268926 | 6.812053  | 11.043321 |
| S    | 11.896346 | 9.154630  | 8.840928  |
| P    | 10.555674 | 4.837979  | 8.710876  |
| S    | 11.268119 | 7.153491  | 6.520527  |
| C    | 11.440298 | 1.057248  | 7.283247  |
| H    | 11.033140 | 0.048028  | 7.407115  |
| C    | 12.554698 | 1.273069  | 6.453899  |
| H    | 13.020413 | 0.430308  | 5.932076  |
| C    | 8.307480  | 9.474213  | 12.165590 |
| H    | 7.270149  | 9.668765  | 11.870379 |
| C    | 7.692934  | 4.867722  | 8.872981  |
| H    | 7.800091  | 4.921927  | 9.961478  |
| C    | 8.897906  | 10.220630 | 13.200220 |
| H    | 8.324993  | 11.003153 | 13.708952 |
| C    | 9.304868  | 10.642731 | 7.131291  |
| H    | 9.911093  | 11.549772 | 7.122693  |
| C    | 10.221212 | 9.953743  | 13.581822 |
| H    | 10.686837 | 10.526702 | 14.390827 |
| C    | 13.181879 | 6.218207  | 8.900424  |
| C    | 12.471659 | 3.650571  | 6.965037  |
| H    | 12.874940 | 4.658528  | 6.834987  |
| C    | 9.074475  | 9.771022  | 6.042288  |
| H    | 9.466725  | 9.875431  | 5.029699  |
| C    | 13.759916 | 8.608189  | 6.700817  |
| H    | 14.560473 | 9.068390  | 6.086811  |
| H    | 14.236196 | 7.797311  | 7.276097  |
| C    | 6.228239  | 4.771536  | 6.929764  |
| H    | 5.220609  | 4.758105  | 6.500841  |
| C    | 11.359431 | 3.442566  | 7.804904  |
| C    | 13.065713 | 2.569486  | 6.292473  |
| H    | 13.930999 | 2.743490  | 5.643923  |
| C    | 10.955688 | 8.942092  | 12.940561 |
| H    | 11.980140 | 8.733432  | 13.262607 |
| C    | 8.257647  | 8.667493  | 6.524436  |
| H    | 7.929273  | 7.811685  | 5.932933  |
| O    | 14.268322 | 5.782029  | 8.985086  |
| C    | 10.433063 | 4.186456  | 10.470851 |
| H    | 9.652572  | 3.408986  | 10.551006 |
| H    | 11.406536 | 3.702089  | 10.669883 |
| C    | 7.353830  | 4.680045  | 6.093309  |
| H    | 7.227423  | 4.587766  | 5.008916  |
| C    | 10.185888 | 5.337291  | 11.456733 |
| H    | 10.321748 | 5.024843  | 12.506898 |
| H    | 9.151640  | 5.714916  | 11.377244 |
| C    | 10.373404 | 8.192174  | 11.897772 |
| C    | 10.841135 | 2.134366  | 7.950748  |
| H    | 9.960097  | 1.954376  | 8.577151  |
| C    | 8.629356  | 10.091377 | 8.296707  |

|   |           |           |           |
|---|-----------|-----------|-----------|
| H | 8.642592  | 10.523594 | 9.298267  |
| C | 7.927237  | 8.915368  | 7.891895  |
| H | 7.328195  | 8.262061  | 8.526387  |
| C | 6.401108  | 4.860891  | 8.320633  |
| H | 5.528961  | 4.910707  | 8.981870  |
| C | 12.717791 | 8.025097  | 5.746706  |
| H | 13.184214 | 7.263242  | 5.095811  |
| H | 12.292404 | 8.804781  | 5.088658  |
| C | 9.043248  | 8.474438  | 11.512162 |
| H | 8.579687  | 7.909000  | 10.695366 |
| C | 8.829878  | 4.779315  | 8.040723  |
| C | 8.645884  | 4.682310  | 6.642632  |
| H | 9.514423  | 4.588215  | 5.982327  |
| C | 12.825550 | 6.609083  | 12.013141 |
| C | 13.851581 | 7.565645  | 11.828768 |
| H | 13.699435 | 8.397332  | 11.130719 |
| C | 13.045532 | 5.537512  | 12.903859 |
| H | 12.277143 | 4.775808  | 13.069093 |
| C | 15.269324 | 6.387711  | 13.415490 |
| H | 16.216328 | 6.299899  | 13.958253 |
| C | 14.263285 | 5.426627  | 13.595529 |
| H | 14.420912 | 4.585649  | 14.279186 |
| C | 15.059388 | 7.460633  | 12.532740 |
| H | 15.841006 | 8.213679  | 12.385690 |
| C | 13.229221 | 9.678018  | 7.655264  |
| H | 12.828134 | 10.547459 | 7.102892  |
| H | 14.047270 | 10.046575 | 8.300578  |
| H | 9.994060  | 7.358191  | 8.838881  |

---

**Table S30.** [CpNi<sup>III</sup>(pdt)HFe<sup>II</sup>(dppe)(CO)]<sup>+</sup> in Cycle B with pdt Oriented Toward Ni ([H1a]<sup>+</sup>, -3204.79237812 E<sub>h</sub>)

| atom | x         | y         | z         |
|------|-----------|-----------|-----------|
| Ni   | 2.510082  | 5.989219  | 2.091223  |
| Fe   | 1.891500  | 6.233924  | 4.596869  |
| S    | 1.343538  | 7.707653  | 2.899931  |
| P    | 2.851650  | 4.742845  | 5.997903  |
| O    | 3.458262  | 8.378735  | 5.812292  |
| C    | 4.605970  | 5.690097  | 1.511227  |
| H    | 5.416354  | 5.571215  | 2.231051  |
| C    | 4.098099  | 6.924805  | 1.003010  |
| H    | 4.474355  | 7.922432  | 1.235720  |
| C    | 3.018452  | 6.627480  | 0.073887  |
| H    | 2.444919  | 7.368201  | -0.485165 |
| C    | -0.421857 | 7.537937  | 2.342482  |
| H    | -1.055187 | 7.622878  | 3.243521  |
| H    | -0.601353 | 8.423764  | 1.708283  |
| C    | -0.739841 | 6.257258  | 1.570762  |
| H    | -0.093839 | 6.190970  | 0.675600  |
| H    | -1.785582 | 6.322781  | 1.208105  |
| C    | 2.818836  | 7.508187  | 5.351600  |
| C    | 2.281998  | 5.252941  | 7.708292  |
| C    | 1.720727  | 2.232441  | 6.822326  |
| H    | 1.368517  | 2.729180  | 7.732163  |
| C    | 1.459662  | 0.861184  | 6.654943  |
| H    | 0.902422  | 0.318876  | 7.426505  |
| C    | 1.923237  | 0.188491  | 5.514251  |
| H    | 1.723052  | -0.880710 | 5.387813  |
| C    | 2.654932  | 0.888971  | 4.540042  |
| H    | 3.029278  | 0.366340  | 3.653210  |
| C    | 2.913617  | 2.256950  | 4.702233  |
| H    | 3.498027  | 2.792369  | 3.945508  |
| C    | 5.280191  | 3.747841  | 7.030090  |
| H    | 4.651700  | 3.012341  | 7.544820  |
| C    | 4.694490  | 4.703484  | 6.167425  |
| C    | 5.527870  | 5.620078  | 5.493953  |
| H    | 5.092268  | 6.363662  | 4.820712  |
| C    | 6.919267  | 5.589762  | 5.686824  |
| H    | 7.555143  | 6.311121  | 5.162145  |
| C    | 7.491266  | 4.642777  | 6.549954  |
| H    | 8.575984  | 4.619867  | 6.699199  |
| C    | 6.668947  | 3.721311  | 7.220541  |
| H    | 7.109667  | 2.976670  | 7.892019  |
| H    | 2.571127  | 4.504011  | 8.467457  |
| H    | 0.193251  | 4.594209  | 7.791809  |
| H    | 2.852596  | 6.172864  | 7.930688  |
| S    | 1.073359  | 4.615159  | 3.097516  |
| C    | -0.613359 | 4.982850  | 2.408033  |
| H    | -1.306429 | 5.008253  | 3.265209  |
| H    | -0.859887 | 4.098970  | 1.794254  |
| C    | 0.770668  | 5.531808  | 7.726808  |
| C    | -1.436312 | 5.607011  | 5.823110  |
| C    | -1.511181 | 4.195875  | 5.756415  |

|   |           |           |           |
|---|-----------|-----------|-----------|
| H | -0.616725 | 3.582453  | 5.918900  |
| C | -2.727682 | 3.561727  | 5.461051  |
| H | -2.771976 | 2.467847  | 5.422573  |
| C | -3.881758 | 4.324806  | 5.213256  |
| H | -4.830525 | 3.828028  | 4.984295  |
| C | -3.813021 | 5.726176  | 5.262748  |
| H | -4.708780 | 6.328245  | 5.075265  |
| C | -2.599171 | 6.366075  | 5.565097  |
| H | -2.563886 | 7.459124  | 5.619742  |
| C | -1.076188 | 8.249343  | 7.905900  |
| H | -1.427987 | 7.365458  | 8.450396  |
| C | -0.281625 | 8.104870  | 6.743126  |
| C | 0.120853  | 9.260979  | 6.043550  |
| H | 0.730188  | 9.168557  | 5.139131  |
| C | -0.249347 | 10.536572 | 6.502599  |
| H | 0.076941  | 11.425421 | 5.952155  |
| C | -1.025873 | 10.669874 | 7.662958  |
| H | -1.309637 | 11.664353 | 8.023429  |
| C | -1.441675 | 9.523253  | 8.362492  |
| H | -2.054248 | 9.620667  | 9.265243  |
| H | 0.497848  | 6.145037  | 8.602505  |
| C | 3.774277  | 4.645471  | 1.000425  |
| H | 3.863593  | 3.582105  | 1.227974  |
| C | 2.820052  | 5.227450  | 0.070504  |
| H | 2.068273  | 4.675776  | -0.495343 |
| C | 2.448824  | 2.945953  | 5.845990  |
| P | 0.198021  | 6.418653  | 6.149933  |
| H | 3.189950  | 5.962249  | 3.746230  |

---

**Table S31.**  $[\text{CpNi}^{\text{III}}(\text{pdt})\text{HFe}^{\text{II}}(\text{dppe})(\text{CO})]^+$  in Cycle B with pdt Oriented Toward Fe ( $[\text{H1a}]^+$ ,  $-3204.79069048 E_{\text{h}}$ )

| atom | x         | y         | z         |
|------|-----------|-----------|-----------|
| Ni   | 10.226775 | 8.766062  | 7.619574  |
| Fe   | 11.327749 | 6.745687  | 8.820907  |
| P    | 13.240841 | 5.523048  | 9.312295  |
| S    | 12.142555 | 8.941542  | 8.746457  |
| P    | 10.905525 | 6.726311  | 11.038409 |
| S    | 11.084581 | 7.042774  | 6.513796  |
| C    | 7.588193  | 6.526418  | 13.500920 |
| H    | 7.402872  | 6.575167  | 14.579282 |
| C    | 6.521146  | 6.326770  | 12.608678 |
| H    | 5.500337  | 6.217197  | 12.989903 |
| C    | 16.336037 | 8.117280  | 10.225812 |
| H    | 16.472912 | 8.972493  | 10.896751 |
| C    | 12.558522 | 7.858555  | 13.098964 |
| H    | 12.967876 | 6.858291  | 13.272817 |
| C    | 17.395509 | 7.680493  | 9.411684  |
| H    | 18.362042 | 8.194487  | 9.444592  |
| C    | 9.711311  | 10.772262 | 6.948921  |
| H    | 10.444543 | 11.545407 | 6.715686  |
| C    | 17.209917 | 6.581184  | 8.558979  |
| H    | 18.031458 | 6.232158  | 7.923977  |
| C    | 10.385896 | 5.282766  | 8.649990  |
| C    | 8.075917  | 6.412090  | 10.737176 |
| H    | 8.254618  | 6.364778  | 9.659396  |
| C    | 9.165551  | 9.824853  | 6.051672  |
| H    | 9.400380  | 9.721819  | 4.991165  |
| C    | 13.747190 | 8.105434  | 6.480734  |
| H    | 14.570349 | 8.438807  | 5.816783  |
| H    | 14.116563 | 7.212980  | 7.011704  |
| C    | 12.489442 | 10.213448 | 13.715143 |
| H    | 12.841151 | 11.041289 | 14.339818 |
| C    | 9.153556  | 6.607861  | 11.625742 |
| C    | 6.767009  | 6.270773  | 11.228201 |
| H    | 5.939779  | 6.113627  | 10.527537 |
| C    | 15.973583 | 5.914632  | 8.518878  |
| H    | 15.845650 | 5.053740  | 7.854938  |
| C    | 8.258242  | 8.967640  | 6.799981  |
| H    | 7.695314  | 8.130087  | 6.384667  |
| O    | 9.735901  | 4.317109  | 8.497102  |
| C    | 11.669229 | 5.138082  | 11.668187 |
| H    | 11.643480 | 5.092281  | 12.771928 |
| H    | 11.002553 | 4.338459  | 11.297630 |
| C    | 11.505477 | 10.437017 | 12.736829 |
| H    | 11.086311 | 11.439542 | 12.598962 |
| C    | 13.093718 | 4.961565  | 11.120877 |
| H    | 13.414709 | 3.909161  | 11.201999 |
| H    | 13.815880 | 5.569532  | 11.691641 |
| C    | 14.906007 | 6.343801  | 9.336394  |
| C    | 8.895764  | 6.668664  | 13.015064 |
| H    | 9.716494  | 6.840792  | 13.720333 |
| C    | 9.150790  | 10.504401 | 8.263107  |



|   |           |           |           |
|---|-----------|-----------|-----------|
| H | 9.385521  | 11.060811 | 9.171891  |
| C | 8.202989  | 9.439627  | 8.146452  |
| H | 7.618674  | 9.007431  | 8.959541  |
| C | 13.012516 | 8.924101  | 13.895671 |
| H | 13.769549 | 8.738871  | 14.665348 |
| C | 12.556580 | 7.722714  | 5.609036  |
| H | 12.841921 | 6.920275  | 4.904723  |
| H | 12.191428 | 8.577545  | 5.010962  |
| C | 15.097182 | 7.459144  | 10.185485 |
| H | 14.278494 | 7.819769  | 10.820050 |
| C | 11.574923 | 8.074596  | 12.109776 |
| C | 11.053475 | 9.377575  | 11.938292 |
| H | 10.276075 | 9.556468  | 11.187001 |
| C | 13.529131 | 3.955572  | 8.374311  |
| C | 12.875712 | 3.737032  | 7.143676  |
| H | 12.187981 | 4.493736  | 6.752110  |
| C | 14.413966 | 2.965824  | 8.864965  |
| H | 14.957182 | 3.122104  | 9.803983  |
| C | 13.960176 | 1.570305  | 6.923529  |
| H | 14.122593 | 0.642325  | 6.365055  |
| C | 14.624227 | 1.781353  | 8.144476  |
| H | 15.309185 | 1.022242  | 8.537229  |
| C | 13.090048 | 2.550354  | 6.423092  |
| H | 12.568558 | 2.391242  | 5.473203  |
| C | 13.479760 | 9.225264  | 7.486198  |
| H | 13.215115 | 10.169519 | 6.976061  |
| H | 14.387137 | 9.409171  | 8.087869  |
| H | 9.957179  | 7.528568  | 8.851672  |

---

**Table S32.** [CpNi<sup>III</sup>(pdt)HFe<sup>II</sup>(dppe)(CO)]<sup>+</sup> Transition State with pdt Oriented Toward Ni ([H1a]<sup>+</sup>, -3204.75933368 E<sub>h</sub>)

| atom | x         | y         | z         |
|------|-----------|-----------|-----------|
| Ni   | 10.309093 | 8.679596  | 7.042980  |
| Fe   | 11.313257 | 6.978439  | 8.939014  |
| P    | 11.912875 | 7.131780  | 11.131083 |
| S    | 11.619292 | 9.319790  | 8.711672  |
| P    | 9.489257  | 5.897493  | 9.658602  |
| S    | 11.708922 | 7.027288  | 6.568988  |
| C    | 7.998461  | 2.255981  | 8.311845  |
| H    | 7.719678  | 1.289312  | 8.744641  |
| C    | 7.876794  | 2.472611  | 6.930589  |
| H    | 7.501655  | 1.674739  | 6.281107  |
| C    | 10.772613 | 10.645033 | 13.051008 |
| H    | 9.841323  | 11.094224 | 13.412887 |
| C    | 8.029189  | 8.248105  | 10.283529 |
| H    | 8.958100  | 8.777672  | 10.042191 |
| C    | 11.990675 | 11.326775 | 13.204138 |
| H    | 12.013576 | 12.310877 | 13.684111 |
| C    | 9.740729  | 9.592106  | 5.068334  |
| H    | 10.361054 | 9.591113  | 4.170857  |
| C    | 13.179026 | 10.738052 | 12.743825 |
| H    | 14.134756 | 11.259618 | 12.864037 |
| C    | 12.051450 | 5.398635  | 8.775470  |
| C    | 8.737480  | 4.730355  | 7.211951  |
| H    | 9.048110  | 5.685804  | 6.775237  |
| C    | 8.869873  | 8.501814  | 5.491779  |
| H    | 8.701525  | 7.580095  | 4.931916  |
| C    | 13.552754 | 9.228503  | 6.574757  |
| H    | 12.860895 | 9.792677  | 5.922163  |
| H    | 14.581021 | 9.533105  | 6.292064  |
| C    | 5.704681  | 8.289632  | 11.004849 |
| H    | 4.823294  | 8.849040  | 11.335992 |
| C    | 8.855241  | 4.525442  | 8.604226  |
| C    | 8.247761  | 3.711519  | 6.382176  |
| H    | 8.166168  | 3.880712  | 5.303088  |
| C    | 13.152927 | 9.471613  | 12.139495 |
| H    | 14.090276 | 9.015055  | 11.805236 |
| C    | 8.210761  | 8.886164  | 6.702115  |
| H    | 7.475510  | 8.303372  | 7.257023  |
| O    | 12.526160 | 4.338803  | 8.589736  |
| C    | 9.999119  | 5.065417  | 11.264041 |
| H    | 9.118497  | 4.646809  | 11.782720 |
| H    | 10.675143 | 4.233337  | 10.996617 |
| C    | 5.638655  | 6.892922  | 10.862367 |
| H    | 4.705457  | 6.361747  | 11.078325 |
| C    | 10.709068 | 6.096867  | 12.151155 |
| H    | 11.241146 | 5.607731  | 12.984567 |
| H    | 9.972689  | 6.791129  | 12.590929 |
| C    | 11.932691 | 8.776025  | 11.985884 |
| C    | 8.484305  | 3.274974  | 9.147251  |
| H    | 8.576558  | 3.080660  | 10.220622 |
| C    | 9.688840  | 10.589559 | 6.055445  |

|   |           |           |           |
|---|-----------|-----------|-----------|
| H | 10.259423 | 11.519232 | 6.076584  |
| C | 8.782661  | 10.133689 | 7.105175  |
| H | 8.534467  | 10.692793 | 8.008530  |
| C | 6.900111  | 8.966442  | 10.714253 |
| H | 6.954475  | 10.055765 | 10.819254 |
| C | 13.410400 | 7.730379  | 6.298567  |
| H | 14.106579 | 7.139951  | 6.921587  |
| H | 13.638037 | 7.514623  | 5.239804  |
| C | 10.740578 | 9.382312  | 12.439539 |
| H | 9.775596  | 8.878610  | 12.319571 |
| C | 7.973051  | 6.845077  | 10.148467 |
| C | 6.764747  | 6.172286  | 10.436321 |
| H | 6.695902  | 5.085804  | 10.311354 |
| C | 13.589049 | 6.464191  | 11.552513 |
| C | 14.564991 | 6.289661  | 10.550233 |
| H | 14.314395 | 6.515276  | 9.507954  |
| C | 13.928415 | 6.179926  | 12.895499 |
| H | 13.202833 | 6.345527  | 13.699919 |
| C | 16.168558 | 5.520912  | 12.208664 |
| H | 17.166100 | 5.147605  | 12.463315 |
| C | 15.207307 | 5.703913  | 13.217900 |
| H | 15.454855 | 5.479651  | 14.260965 |
| C | 15.848430 | 5.820924  | 10.876027 |
| H | 16.594556 | 5.684202  | 10.085962 |
| C | 13.328372 | 9.631581  | 8.033658  |
| H | 13.486932 | 10.717149 | 8.155171  |
| H | 14.034288 | 9.106472  | 8.702360  |
| H | 9.924217  | 7.405922  | 8.208524  |

---

**Table S33.**  $[\text{CpNi}^{\text{III}}(\text{pdt})\text{HFe}^{\text{II}}(\text{dppe})(\text{CO})]^+$  Transition State with pdt Oriented Toward Fe ( $[\text{H1a}]^+$ ,  $-3204.76094325 E_{\text{h}}$ )

| atom | x         | y         | z         |
|------|-----------|-----------|-----------|
| Ni   | 10.253148 | 8.702348  | 7.076186  |
| Fe   | 11.340618 | 6.991811  | 8.917689  |
| P    | 11.937112 | 7.132018  | 11.114491 |
| S    | 11.609695 | 9.345595  | 8.700876  |
| P    | 9.521964  | 5.892238  | 9.631650  |
| S    | 11.657961 | 7.083127  | 6.532500  |
| C    | 8.120259  | 2.224981  | 8.262907  |
| H    | 7.886861  | 1.242191  | 8.686115  |
| C    | 7.953607  | 2.460033  | 6.889488  |
| H    | 7.588996  | 1.660274  | 6.236340  |
| C    | 10.890466 | 10.690315 | 13.017046 |
| H    | 9.981302  | 11.150022 | 13.419674 |
| C    | 8.051391  | 8.215483  | 10.328710 |
| H    | 8.985431  | 8.754243  | 10.131242 |
| C    | 12.114899 | 11.373597 | 13.083513 |
| H    | 12.165059 | 12.369838 | 13.535499 |
| C    | 9.672761  | 9.641123  | 5.143587  |
| H    | 10.291442 | 9.659683  | 4.245161  |
| C    | 13.276032 | 10.770287 | 12.573623 |
| H    | 14.237369 | 11.292627 | 12.628142 |
| C    | 12.085489 | 5.419234  | 8.720175  |
| C    | 8.741340  | 4.742213  | 7.186988  |
| H    | 9.003682  | 5.715926  | 6.758765  |
| C    | 8.791373  | 8.550051  | 5.539090  |
| H    | 8.618376  | 7.641796  | 4.959066  |
| C    | 14.001246 | 8.555365  | 7.316674  |
| H    | 14.985811 | 8.917207  | 6.957647  |
| H    | 14.200248 | 7.823772  | 8.121777  |
| C    | 5.711833  | 8.229346  | 11.001042 |
| H    | 4.824900  | 8.774930  | 11.340344 |
| C    | 8.905104  | 4.517752  | 8.571812  |
| C    | 8.265132  | 3.720583  | 6.353087  |
| H    | 8.146894  | 3.904978  | 5.279908  |
| C    | 13.214984 | 9.488835  | 12.005469 |
| H    | 14.132154 | 9.019220  | 11.634005 |
| C    | 8.139050  | 8.908737  | 6.760515  |
| H    | 7.404732  | 8.314725  | 7.304568  |
| O    | 12.544290 | 4.358730  | 8.498938  |
| C    | 10.029390 | 5.073761  | 11.243735 |
| H    | 9.150732  | 4.637442  | 11.751083 |
| H    | 10.731729 | 4.258120  | 10.993370 |
| C    | 5.645308  | 6.841871  | 10.787649 |
| H    | 4.706294  | 6.303972  | 10.956678 |
| C    | 10.698363 | 6.133350  | 12.128804 |
| H    | 11.204569 | 5.673009  | 12.994069 |
| H    | 9.938951  | 6.832983  | 12.518304 |
| C    | 11.987079 | 8.791755  | 11.937307 |
| C    | 8.592773  | 3.246612  | 9.102962  |
| H    | 8.719441  | 3.038811  | 10.170179 |
| C    | 9.626767  | 10.616962 | 6.155956  |

|   |           |           |           |
|---|-----------|-----------|-----------|
| H | 10.202400 | 11.542881 | 6.197394  |
| C | 8.714035  | 10.145007 | 7.191268  |
| H | 8.470809  | 10.682256 | 8.108970  |
| C | 6.915385  | 8.915363  | 10.770907 |
| H | 6.970265  | 9.997914  | 10.931300 |
| C | 13.303312 | 7.855630  | 6.150815  |
| H | 13.923509 | 7.020718  | 5.778175  |
| H | 13.133769 | 8.552297  | 5.309245  |
| C | 10.823283 | 9.411520  | 12.441228 |
| H | 9.852901  | 8.906839  | 12.391356 |
| C | 7.994563  | 6.820826  | 10.123314 |
| C | 6.778938  | 6.138712  | 10.351692 |
| H | 6.711759  | 5.059412  | 10.174699 |
| C | 13.576841 | 6.423138  | 11.619165 |
| C | 14.549237 | 6.049287  | 10.671222 |
| H | 14.336738 | 6.155988  | 9.603681  |
| C | 13.875234 | 6.285814  | 12.995844 |
| H | 13.151621 | 6.605297  | 13.754637 |
| C | 16.067383 | 5.381008  | 12.450574 |
| H | 17.030436 | 4.971525  | 12.773383 |
| C | 15.109191 | 5.762879  | 13.406083 |
| H | 15.324635 | 5.657486  | 14.474782 |
| C | 15.787975 | 5.529878  | 11.084348 |
| H | 16.530858 | 5.238209  | 10.334305 |
| C | 13.237580 | 9.745957  | 7.894714  |
| H | 13.036950 | 10.511755 | 7.123456  |
| H | 13.825903 | 10.222922 | 8.698956  |
| H | 9.924117  | 7.426988  | 8.232187  |

---

**Table S34.** [CpNi<sup>II</sup>(pdt)HFe<sup>II</sup>(dppe)(CO)]<sup>0</sup> in Cycle A with pdt Oriented Toward Ni ([H1a]<sup>0</sup>, -3204.96518567 E<sub>h</sub>)

| atom | x         | y         | z         |
|------|-----------|-----------|-----------|
| Ni   | 2.459552  | 6.042756  | 1.605011  |
| Fe   | 1.836147  | 5.971505  | 4.553767  |
| S    | 1.329295  | 7.481681  | 2.832344  |
| P    | 2.685323  | 7.486714  | 5.908894  |
| O    | -0.807368 | 5.845126  | 5.865925  |
| C    | 4.480742  | 6.342023  | 0.978953  |
| H    | 5.267611  | 6.578298  | 1.695272  |
| C    | 3.605875  | 7.282942  | 0.334336  |
| H    | 3.639120  | 8.367986  | 0.455726  |
| C    | 2.736418  | 6.572138  | -0.588884 |
| H    | 1.986248  | 7.028513  | -1.236723 |
| C    | -0.461418 | 7.196372  | 2.399469  |
| H    | -1.035469 | 7.222301  | 3.343312  |
| H    | -0.769966 | 8.060901  | 1.784142  |
| C    | -0.730221 | 5.897204  | 1.629734  |
| H    | -0.189765 | 5.938254  | 0.664732  |
| H    | -1.815821 | 5.848296  | 1.398466  |
| C    | 0.241904  | 5.891814  | 5.317955  |
| C    | 3.139556  | 6.585157  | 7.493279  |
| C    | 5.470049  | 8.237475  | 6.122438  |
| H    | 5.518843  | 7.661436  | 7.052640  |
| C    | 6.631486  | 8.890034  | 5.671080  |
| H    | 7.558087  | 8.808249  | 6.251072  |
| C    | 6.602118  | 9.646112  | 4.490390  |
| H    | 7.505739  | 10.158065 | 4.140795  |
| C    | 5.405175  | 9.743770  | 3.759267  |
| H    | 5.371298  | 10.335836 | 2.837535  |
| C    | 4.249180  | 9.085109  | 4.201697  |
| H    | 3.324084  | 9.156534  | 3.617955  |
| C    | 2.327906  | 9.870516  | 7.428751  |
| H    | 3.382818  | 9.756183  | 7.704725  |
| C    | 1.723527  | 8.943422  | 6.550036  |
| C    | 0.378596  | 9.133139  | 6.177159  |
| H    | -0.093519 | 8.426473  | 5.489649  |
| C    | -0.354215 | 10.219891 | 6.683493  |
| H    | -1.399744 | 10.354936 | 6.384205  |
| C    | 0.250037  | 11.128135 | 7.565782  |
| H    | -0.321708 | 11.975896 | 7.960175  |
| C    | 1.594249  | 10.951860 | 7.937437  |
| H    | 2.074594  | 11.662343 | 8.620041  |
| H    | 3.754039  | 7.201247  | 8.175165  |
| H    | 4.844396  | 5.438033  | 6.742731  |
| H    | 2.174625  | 6.398792  | 8.000347  |
| S    | 1.473916  | 4.466366  | 2.786968  |
| C    | -0.336780 | 4.606994  | 2.360569  |
| H    | -0.905757 | 4.499813  | 3.302116  |
| H    | -0.566231 | 3.736745  | 1.719115  |
| C    | 3.826383  | 5.258736  | 7.132061  |
| C    | 4.188283  | 3.426584  | 4.888779  |
| C    | 5.296586  | 4.108608  | 4.337886  |

|   |           |          |           |
|---|-----------|----------|-----------|
| H | 5.352731  | 5.201334 | 4.406329  |
| C | 6.315578  | 3.402973 | 3.681383  |
| H | 7.173176  | 3.947004 | 3.269183  |
| C | 6.231725  | 2.006400 | 3.542610  |
| H | 7.024499  | 1.456112 | 3.023233  |
| C | 5.124232  | 1.323450 | 4.066877  |
| H | 5.044571  | 0.235930 | 3.956167  |
| C | 4.110078  | 2.027066 | 4.739112  |
| H | 3.254303  | 1.480518 | 5.146997  |
| C | 2.423745  | 2.366523 | 7.704149  |
| H | 3.440689  | 2.568322 | 8.059124  |
| C | 1.891429  | 3.090174 | 6.612686  |
| C | 0.599200  | 2.762165 | 6.153591  |
| H | 0.182554  | 3.303864 | 5.300026  |
| C | -0.151062 | 1.753258 | 6.779559  |
| H | -1.155276 | 1.516802 | 6.410319  |
| C | 0.380175  | 1.056751 | 7.875799  |
| H | -0.207495 | 0.274721 | 8.369783  |
| C | 1.672179  | 1.363322 | 8.334824  |
| H | 2.099331  | 0.817480 | 9.183920  |
| H | 3.919820  | 4.599377 | 8.011764  |
| C | 4.028389  | 5.046718 | 0.598365  |
| H | 4.426994  | 4.094624 | 0.953404  |
| C | 2.971542  | 5.199575 | -0.402375 |
| H | 2.441624  | 4.374615 | -0.882931 |
| C | 4.265331  | 8.323655 | 5.393241  |
| P | 2.859476  | 4.417516 | 5.736038  |
| H | 3.241933  | 6.054995 | 3.919996  |

---

**Table S35.** [CpNi<sup>II</sup>(pdt)HFe<sup>II</sup>(dppe)(CO)]<sup>0</sup> in Cycle A with pdt Oriented Toward Fe ([H1a]<sup>0</sup>, -3204.96246943 E<sub>h</sub>)

| atom | x         | y         | z         |
|------|-----------|-----------|-----------|
| Ni   | 10.311748 | 9.055122  | 7.210982  |
| Fe   | 11.524935 | 6.725881  | 8.826819  |
| P    | 11.294318 | 6.742363  | 11.012568 |
| S    | 11.898360 | 9.049312  | 8.728527  |
| P    | 10.588237 | 4.734572  | 8.789334  |
| S    | 11.192428 | 7.160939  | 6.535917  |
| C    | 11.059342 | 1.042737  | 6.928037  |
| H    | 10.541980 | 0.076413  | 6.927202  |
| C    | 12.211721 | 1.227459  | 6.144613  |
| H    | 12.596975 | 0.404001  | 5.532542  |
| C    | 8.339702  | 9.556459  | 11.810893 |
| H    | 7.587363  | 10.108050 | 11.235434 |
| C    | 7.826281  | 4.126175  | 9.378581  |
| H    | 8.149943  | 3.766013  | 10.360909 |
| C    | 8.421253  | 9.720942  | 13.202431 |
| H    | 7.733074  | 10.400328 | 13.718343 |
| C    | 9.824335  | 11.148412 | 6.623055  |
| H    | 10.525447 | 11.984680 | 6.652428  |
| C    | 9.392066  | 9.014063  | 13.931681 |
| H    | 9.464105  | 9.138417  | 15.018347 |
| C    | 13.184007 | 6.100084  | 8.911302  |
| C    | 12.368117 | 3.527277  | 6.926679  |
| H    | 12.874747 | 4.496529  | 6.925464  |
| C    | 9.548040  | 10.316740 | 5.523157  |
| H    | 9.991400  | 10.376594 | 4.527631  |
| C    | 13.856331 | 8.276548  | 6.731394  |
| H    | 14.698313 | 8.671004  | 6.123612  |
| H    | 14.266988 | 7.437267  | 7.313424  |
| C    | 6.008848  | 4.526632  | 7.808661  |
| H    | 4.942517  | 4.487402  | 7.559204  |
| C    | 11.218343 | 3.349185  | 7.721191  |
| C    | 12.862443 | 2.470624  | 6.143522  |
| H    | 13.757579 | 2.623142  | 5.529943  |
| C    | 10.276207 | 8.147409  | 13.271458 |
| H    | 11.036720 | 7.608959  | 13.847826 |
| C    | 8.614520  | 9.294376  | 5.973712  |
| H    | 8.224997  | 8.483891  | 5.354135  |
| O    | 14.245244 | 5.603532  | 9.080900  |
| C    | 10.788175 | 4.016857  | 10.517787 |
| H    | 10.169736 | 3.114339  | 10.675458 |
| H    | 11.846850 | 3.700806  | 10.566340 |
| C    | 6.935978  | 5.024954  | 6.876673  |
| H    | 6.595070  | 5.373402  | 5.895021  |
| C    | 10.491926 | 5.115241  | 11.551946 |
| H    | 10.807264 | 4.833756  | 12.572742 |
| H    | 9.408613  | 5.329223  | 11.590465 |
| C    | 10.198309 | 7.974361  | 11.870938 |
| C    | 10.562485 | 2.097694  | 7.707120  |
| H    | 9.649200  | 1.951690  | 8.295871  |
| C    | 9.046764  | 10.662483 | 7.758842  |



|   |           |           |           |
|---|-----------|-----------|-----------|
| H | 9.061870  | 11.100630 | 8.758983  |
| C | 8.228285  | 9.575947  | 7.324752  |
| H | 7.513755  | 9.011055  | 7.924305  |
| C | 6.457283  | 4.080179  | 9.060099  |
| H | 5.743733  | 3.689669  | 9.794836  |
| C | 12.791193 | 7.742887  | 5.765407  |
| H | 13.203774 | 6.881334  | 5.207475  |
| H | 12.496457 | 8.511974  | 5.028748  |
| C | 9.223226  | 8.689254  | 11.146272 |
| H | 9.167198  | 8.566748  | 10.058514 |
| C | 8.763753  | 4.628762  | 8.452572  |
| C | 8.299962  | 5.081435  | 7.195871  |
| H | 9.014000  | 5.484324  | 6.468062  |
| C | 12.845964 | 6.864677  | 12.018955 |
| C | 13.473819 | 8.126796  | 12.132126 |
| H | 13.001266 | 9.008230  | 11.683481 |
| C | 13.475732 | 5.739886  | 12.590060 |
| H | 13.023240 | 4.745836  | 12.502910 |
| C | 15.307254 | 7.131173  | 13.386911 |
| H | 16.259867 | 7.234310  | 13.918545 |
| C | 14.697522 | 5.873016  | 13.271089 |
| H | 15.172442 | 4.987811  | 13.709292 |
| C | 14.692033 | 8.257603  | 12.813905 |
| H | 15.162506 | 9.243921  | 12.898382 |
| C | 13.417725 | 9.386376  | 7.696195  |
| H | 13.197828 | 10.323500 | 7.153237  |
| H | 14.237941 | 9.590936  | 8.409068  |
| H | 10.051282 | 7.175035  | 8.882086  |

---

**Table S36.** [CpNi<sup>II</sup>(pdt)HFe<sup>II</sup>(dppe)(CO)]<sup>0</sup> in Cycle B with pdt Oriented Toward Ni ([H1a]<sup>0</sup>, -3204.96011758 E<sub>h</sub>)

| atom | x         | y         | z         |
|------|-----------|-----------|-----------|
| Ni   | 2.505936  | 6.027790  | 1.859034  |
| Fe   | 1.973376  | 6.230903  | 4.655664  |
| S    | 1.509595  | 7.716014  | 2.892030  |
| P    | 2.844904  | 4.752795  | 6.037451  |
| O    | 3.515391  | 8.355479  | 5.915032  |
| C    | 4.538137  | 5.758413  | 1.249538  |
| H    | 5.335253  | 5.659532  | 1.986848  |
| C    | 4.015089  | 6.975102  | 0.713867  |
| H    | 4.367551  | 7.982622  | 0.944300  |
| C    | 2.993265  | 6.647706  | -0.277808 |
| H    | 2.427836  | 7.376723  | -0.861363 |
| C    | -0.296791 | 7.622150  | 2.449739  |
| H    | -0.874490 | 7.703206  | 3.388998  |
| H    | -0.501015 | 8.523231  | 1.843049  |
| C    | -0.693708 | 6.366108  | 1.670118  |
| H    | -0.095826 | 6.315081  | 0.740050  |
| H    | -1.759867 | 6.459466  | 1.372730  |
| C    | 2.872139  | 7.486369  | 5.436579  |
| C    | 2.248393  | 5.238055  | 7.752725  |
| C    | 1.753055  | 2.212550  | 6.869203  |
| H    | 1.409191  | 2.701893  | 7.786856  |
| C    | 1.491113  | 0.842440  | 6.691319  |
| H    | 0.945572  | 0.290320  | 7.465362  |
| C    | 1.934301  | 0.184490  | 5.534163  |
| H    | 1.732122  | -0.883684 | 5.396626  |
| C    | 2.640887  | 0.901794  | 4.553705  |
| H    | 2.990923  | 0.395265  | 3.647232  |
| C    | 2.897344  | 2.269037  | 4.726786  |
| H    | 3.447439  | 2.821048  | 3.956978  |
| C    | 5.240117  | 3.800178  | 7.237679  |
| H    | 4.585548  | 3.129261  | 7.806442  |
| C    | 4.687692  | 4.681773  | 6.281120  |
| C    | 5.551841  | 5.508148  | 5.535770  |
| H    | 5.130647  | 6.183250  | 4.784506  |
| C    | 6.939802  | 5.464216  | 5.751314  |
| H    | 7.599580  | 6.114183  | 5.165400  |
| C    | 7.478511  | 4.593114  | 6.710339  |
| H    | 8.561155  | 4.559138  | 6.877195  |
| C    | 6.625153  | 3.758771  | 7.452916  |
| H    | 7.039566  | 3.070363  | 8.198403  |
| H    | 2.512094  | 4.486666  | 8.519705  |
| H    | 0.160841  | 4.587549  | 7.794422  |
| H    | 2.816670  | 6.156053  | 7.988527  |
| S    | 1.198250  | 4.666575  | 3.017930  |
| C    | -0.532583 | 5.060026  | 2.454480  |
| H    | -1.178745 | 5.062956  | 3.347245  |
| H    | -0.832164 | 4.205671  | 1.820941  |
| C    | 0.738585  | 5.525610  | 7.730383  |
| C    | -1.456318 | 5.570533  | 5.862294  |
| C    | -1.516494 | 4.157867  | 5.790070  |

|   |           |           |           |
|---|-----------|-----------|-----------|
| H | -0.607076 | 3.559779  | 5.924409  |
| C | -2.727154 | 3.503882  | 5.515757  |
| H | -2.750620 | 2.409095  | 5.467443  |
| C | -3.899489 | 4.246148  | 5.294511  |
| H | -4.844296 | 3.734850  | 5.078592  |
| C | -3.849124 | 5.648538  | 5.347164  |
| H | -4.756939 | 6.238521  | 5.175101  |
| C | -2.639596 | 6.305599  | 5.626341  |
| H | -2.619290 | 7.399629  | 5.671075  |
| C | -1.116821 | 8.238439  | 7.868358  |
| H | -1.482854 | 7.359304  | 8.411823  |
| C | -0.307617 | 8.074959  | 6.719646  |
| C | 0.115977  | 9.223825  | 6.020995  |
| H | 0.741203  | 9.111414  | 5.128528  |
| C | -0.249900 | 10.506518 | 6.464771  |
| H | 0.093757  | 11.388208 | 5.912179  |
| C | -1.043596 | 10.656837 | 7.611516  |
| H | -1.324616 | 11.657061 | 7.960439  |
| C | -1.479424 | 9.518463  | 8.312263  |
| H | -2.105385 | 9.627713  | 9.205480  |
| H | 0.444959  | 6.149506  | 8.592434  |
| C | 3.719875  | 4.704053  | 0.732341  |
| H | 3.809902  | 3.643816  | 0.978124  |
| C | 2.817564  | 5.257410  | -0.271953 |
| H | 2.087415  | 4.686139  | -0.847957 |
| C | 2.459748  | 2.942860  | 5.890116  |
| P | 0.201052  | 6.389453  | 6.110250  |
| H | 3.214647  | 6.028044  | 3.783052  |

---

**Table S37.** [CpNi<sup>II</sup>(pdt)HFe<sup>II</sup>(dppe)(CO)]<sup>0</sup> in Cycle B with pdt Oriented Toward Fe ([H1a]<sup>0</sup>, -3204.95690824 E<sub>h</sub>)

| atom | x         | y         | z         |
|------|-----------|-----------|-----------|
| Ni   | 10.223777 | 8.952914  | 7.469037  |
| Fe   | 11.265461 | 6.682839  | 8.885089  |
| P    | 13.230307 | 5.547099  | 9.312824  |
| S    | 12.065938 | 8.929285  | 8.693801  |
| P    | 10.913309 | 6.670358  | 11.052086 |
| S    | 10.900661 | 7.053858  | 6.565333  |
| C    | 7.655097  | 6.274955  | 13.600788 |
| H    | 7.497144  | 6.211651  | 14.683566 |
| C    | 6.560112  | 6.209441  | 12.722003 |
| H    | 5.544837  | 6.092127  | 13.117657 |
| C    | 16.304435 | 8.157559  | 10.264772 |
| H    | 16.412039 | 9.023307  | 10.928390 |
| C    | 12.509196 | 7.844817  | 13.152767 |
| H    | 12.917442 | 6.848036  | 13.351483 |
| C    | 17.382824 | 7.740133  | 9.466025  |
| H    | 18.338382 | 8.275168  | 9.505275  |
| C    | 9.749619  | 11.048613 | 6.768627  |
| H    | 10.491791 | 11.815434 | 6.540149  |
| C    | 17.224866 | 6.635343  | 8.614281  |
| H    | 18.058516 | 6.301911  | 7.985219  |
| C    | 10.347252 | 5.224421  | 8.731784  |
| C    | 8.072656  | 6.452811  | 10.829020 |
| H    | 8.237054  | 6.530441  | 9.749964  |
| C    | 9.180655  | 10.130540 | 5.870865  |
| H    | 9.389547  | 10.044558 | 4.802809  |
| C    | 13.635030 | 7.910984  | 6.473756  |
| H    | 14.479321 | 8.165229  | 5.798524  |
| H    | 13.951773 | 7.023237  | 7.044854  |
| C    | 12.432870 | 10.213101 | 13.712735 |
| H    | 12.773114 | 11.056027 | 14.324691 |
| C    | 9.177387  | 6.511526  | 11.701777 |
| C    | 6.771495  | 6.301028  | 11.337890 |
| H    | 5.922246  | 6.255262  | 10.646736 |
| C    | 16.001905 | 5.945596  | 8.564548  |
| H    | 15.896652 | 5.084157  | 7.896813  |
| C    | 8.300277  | 9.245983  | 6.629315  |
| H    | 7.721756  | 8.422263  | 6.206166  |
| O    | 9.693181  | 4.249773  | 8.589314  |
| C    | 11.716278 | 5.104355  | 11.709304 |
| H    | 11.716821 | 5.061275  | 12.814076 |
| H    | 11.059221 | 4.290369  | 11.352790 |
| C    | 11.478140 | 10.414592 | 12.701190 |
| H    | 11.072345 | 11.416280 | 12.520194 |
| C    | 13.132175 | 4.954985  | 11.130685 |
| H    | 13.476964 | 3.908560  | 11.200363 |
| H    | 13.850168 | 5.575239  | 11.694757 |
| C    | 14.914846 | 6.348405  | 9.370330  |
| C    | 8.953957  | 6.428048  | 13.094792 |
| H    | 9.798508  | 6.500316  | 13.790198 |
| C    | 9.244466  | 10.729626 | 8.097427  |

|   |           |           |           |
|---|-----------|-----------|-----------|
| H | 9.516227  | 11.258093 | 9.013718  |
| C | 8.266363  | 9.689458  | 7.985744  |
| H | 7.687187  | 9.253284  | 8.800215  |
| C | 12.947864 | 8.927233  | 13.935740 |
| H | 13.689523 | 8.759104  | 14.725164 |
| C | 12.426375 | 7.540074  | 5.617301  |
| H | 12.678022 | 6.676578  | 4.973709  |
| H | 12.124782 | 8.376320  | 4.959601  |
| C | 15.079867 | 7.474212  | 10.212886 |
| H | 14.241950 | 7.829007  | 10.824925 |
| C | 11.551081 | 8.036273  | 12.134620 |
| C | 11.044566 | 9.337969  | 11.915181 |
| H | 10.303424 | 9.503211  | 11.125156 |
| C | 13.568311 | 3.967378  | 8.389130  |
| C | 12.884799 | 3.733602  | 7.177984  |
| H | 12.168250 | 4.479839  | 6.816498  |
| C | 14.483653 | 2.993555  | 8.851298  |
| H | 15.045913 | 3.162564  | 9.777294  |
| C | 14.007369 | 1.589392  | 6.921670  |
| H | 14.173705 | 0.665140  | 6.356685  |
| C | 14.699824 | 1.813120  | 8.124451  |
| H | 15.411180 | 1.067011  | 8.497112  |
| C | 13.102855 | 2.552242  | 6.449042  |
| H | 12.556639 | 2.383539  | 5.514135  |
| C | 13.437396 | 9.084023  | 7.438288  |
| H | 13.227502 | 10.017462 | 6.883795  |
| H | 14.362562 | 9.233346  | 8.022352  |
| H | 9.953479  | 7.467292  | 8.843108  |

---

**Table S38.** [CpNi<sup>II</sup>(pdt)HFe<sup>II</sup>(dppe)(CO)]<sup>0</sup> Transition State with pdt Oriented Toward Ni ([H1a]<sup>0</sup>, -3204.92842649 E<sub>h</sub>)

| atom | x         | y         | z         |
|------|-----------|-----------|-----------|
| Ni   | 10.386115 | 8.488705  | 6.450412  |
| Fe   | 11.206965 | 6.773296  | 8.946701  |
| P    | 12.081704 | 7.128308  | 10.952948 |
| S    | 11.385180 | 9.065630  | 8.322202  |
| P    | 9.538891  | 5.923354  | 9.965837  |
| S    | 11.577463 | 6.657422  | 6.579128  |
| C    | 6.703053  | 2.986559  | 9.150436  |
| H    | 5.827657  | 2.555373  | 9.649759  |
| C    | 7.106807  | 2.505363  | 7.893097  |
| H    | 6.547637  | 1.695694  | 7.410334  |
| C    | 10.358554 | 10.631642 | 12.390903 |
| H    | 9.508438  | 11.265134 | 12.114287 |
| C    | 7.794295  | 6.948259  | 12.027497 |
| H    | 8.271179  | 6.249536  | 12.722925 |
| C    | 11.119126 | 10.928066 | 13.532091 |
| H    | 10.869261 | 11.797166 | 14.151495 |
| C    | 10.055674 | 9.276911  | 4.367297  |
| H    | 10.792306 | 9.269119  | 3.562306  |
| C    | 12.199881 | 10.100924 | 13.880900 |
| H    | 12.795037 | 10.318344 | 14.775453 |
| C    | 12.093462 | 5.288052  | 8.874685  |
| C    | 8.938950  | 4.108640  | 7.872126  |
| H    | 9.808370  | 4.553397  | 7.375027  |
| C    | 9.192111  | 8.167287  | 4.735186  |
| H    | 9.155225  | 7.202071  | 4.225303  |
| C    | 13.574833 | 8.699062  | 6.499642  |
| H    | 13.008096 | 9.229502  | 5.710517  |
| H    | 14.651866 | 8.909321  | 6.328154  |
| C    | 6.144502  | 8.697517  | 11.643134 |
| H    | 5.350946  | 9.354038  | 12.017357 |
| C    | 8.543628  | 4.592311  | 9.135382  |
| C    | 8.223295  | 3.068823  | 7.255345  |
| H    | 8.540303  | 2.701960  | 6.272521  |
| C    | 12.522775 | 8.990121  | 13.086239 |
| H    | 13.366991 | 8.352882  | 13.370712 |
| C    | 8.339346  | 8.573307  | 5.816620  |
| H    | 7.549818  | 7.976434  | 6.274600  |
| O    | 12.678960 | 4.261257  | 8.758158  |
| C    | 10.251515 | 4.989819  | 11.448701 |
| H    | 9.472836  | 4.628586  | 12.144415 |
| H    | 10.714234 | 4.097535  | 10.990923 |
| C    | 6.539252  | 8.761172  | 10.295227 |
| H    | 6.052113  | 9.467294  | 9.612886  |
| C    | 11.307549 | 5.855242  | 12.158646 |
| H    | 12.099233 | 5.241570  | 12.622348 |
| H    | 10.846585 | 6.454203  | 12.962633 |
| C    | 11.771842 | 8.692030  | 11.925480 |
| C    | 7.415484  | 4.025733  | 9.767635  |
| H    | 7.081358  | 4.408864  | 10.739128 |
| C    | 9.830195  | 10.307804 | 5.297321  |

|   |           |           |           |
|---|-----------|-----------|-----------|
| H | 10.356428 | 11.262402 | 5.356443  |
| C | 8.794076  | 9.861915  | 6.225914  |
| H | 8.405496  | 10.452042 | 7.058381  |
| C | 6.778434  | 7.792897  | 12.507637 |
| H | 6.483654  | 7.739559  | 13.562033 |
| C | 13.348261 | 7.190928  | 6.340191  |
| H | 13.952951 | 6.610795  | 7.059162  |
| H | 13.627665 | 6.878140  | 5.317463  |
| C | 10.679747 | 9.520211  | 11.593691 |
| H | 10.077434 | 9.291679  | 10.710974 |
| C | 8.198020  | 7.001739  | 10.676117 |
| C | 7.562056  | 7.928827  | 9.819065  |
| H | 7.887647  | 8.003707  | 8.774337  |
| C | 13.915601 | 6.895981  | 11.165587 |
| C | 14.798964 | 7.997394  | 11.074582 |
| H | 14.396263 | 9.013624  | 11.000326 |
| C | 14.468883 | 5.600357  | 11.273843 |
| H | 13.815236 | 4.722703  | 11.313382 |
| C | 16.725643 | 6.515267  | 11.222034 |
| H | 17.811042 | 6.367495  | 11.246804 |
| C | 15.859295 | 5.413107  | 11.305807 |
| H | 16.265070 | 4.398810  | 11.393395 |
| C | 16.189436 | 7.808020  | 11.104867 |
| H | 16.854823 | 8.676867  | 11.041413 |
| C | 13.185341 | 9.278081  | 7.864929  |
| H | 13.379315 | 10.366325 | 7.873438  |
| H | 13.778746 | 8.811136  | 8.670467  |
| H | 9.778918  | 6.986320  | 8.328362  |

---

**Table S39.** [CpNi<sup>II</sup>(pdt)HFe<sup>II</sup>(dppe)(CO)]<sup>0</sup> Transition State with pdt Oriented Toward Fe ([H1a]<sup>0</sup>, -3204.93021804 E<sub>h</sub>)

| atom | x         | y         | z         |
|------|-----------|-----------|-----------|
| Ni   | 10.413099 | 8.829738  | 6.589482  |
| Fe   | 11.248861 | 6.867737  | 8.936903  |
| P    | 12.017960 | 7.049421  | 11.012062 |
| S    | 11.343785 | 9.222576  | 8.533936  |
| P    | 9.564360  | 5.864145  | 9.769298  |
| S    | 11.631793 | 7.022438  | 6.568959  |
| C    | 6.900213  | 2.910893  | 8.538766  |
| H    | 6.021780  | 2.400050  | 8.949773  |
| C    | 7.382906  | 2.569826  | 7.263535  |
| H    | 6.882580  | 1.789746  | 6.678365  |
| C    | 10.296754 | 10.448862 | 12.657434 |
| H    | 9.416720  | 11.065838 | 12.444056 |
| C    | 7.575373  | 7.869414  | 9.733245  |
| H    | 7.992556  | 8.099032  | 8.744881  |
| C    | 11.112098 | 10.738401 | 13.762644 |
| H    | 10.873794 | 11.584491 | 14.417409 |
| C    | 9.299148  | 8.687034  | 4.794935  |
| H    | 9.294309  | 7.782564  | 4.182620  |
| C    | 12.232654 | 9.934675  | 14.028515 |
| H    | 12.870476 | 10.146381 | 14.894560 |
| C    | 12.210501 | 5.436309  | 8.749244  |
| C    | 9.142884  | 4.237174  | 7.487952  |
| H    | 10.013932 | 4.761223  | 7.078956  |
| C    | 8.386332  | 8.976235  | 5.864486  |
| H    | 7.574728  | 8.335441  | 6.210983  |
| C    | 13.928290 | 8.392725  | 7.599007  |
| H    | 14.959025 | 8.732061  | 7.364390  |
| H    | 14.004360 | 7.674586  | 8.435825  |
| C    | 5.979855  | 8.354479  | 11.507756 |
| H    | 5.142731  | 8.944665  | 11.897226 |
| C    | 8.668546  | 4.579990  | 8.770033  |
| C    | 8.502158  | 3.235517  | 6.739581  |
| H    | 8.880095  | 2.978874  | 5.743467  |
| C    | 12.541259 | 8.852552  | 13.188887 |
| H    | 13.415206 | 8.231781  | 13.411439 |
| C    | 8.812073  | 10.211302 | 6.436186  |
| H    | 8.376524  | 10.707466 | 7.305940  |
| O    | 12.827663 | 4.442316  | 8.549623  |
| C    | 10.226011 | 4.845799  | 11.218037 |
| H    | 9.427783  | 4.359776  | 11.807745 |
| H    | 10.809677 | 4.041418  | 10.735608 |
| C    | 6.548593  | 7.336193  | 12.287088 |
| H    | 6.158629  | 7.126529  | 13.289821 |
| C    | 11.121232 | 5.744069  | 12.085705 |
| H    | 11.844968 | 5.165701  | 12.686214 |
| H    | 10.507046 | 6.329613  | 12.792041 |
| C    | 11.735327 | 8.562607  | 12.064896 |
| C    | 7.537067  | 3.912162  | 9.287012  |
| H    | 7.139972  | 4.186790  | 10.271338 |
| C    | 10.184779 | 9.822677  | 4.604536  |



|   |           |           |           |
|---|-----------|-----------|-----------|
| H | 10.964984 | 9.901335  | 3.845703  |
| C | 9.902630  | 10.748764 | 5.628021  |
| H | 10.421075 | 11.690186 | 5.819522  |
| C | 6.496148  | 8.616658  | 10.227042 |
| H | 6.060730  | 9.412186  | 9.611443  |
| C | 13.375947 | 7.654642  | 6.375454  |
| H | 14.001447 | 6.768983  | 6.160734  |
| H | 13.368294 | 8.300487  | 5.478378  |
| C | 10.604276 | 9.369066  | 11.813813 |
| H | 9.961313  | 9.148511  | 10.957321 |
| C | 8.148761  | 6.830966  | 10.502025 |
| C | 7.620764  | 6.577343  | 11.786897 |
| H | 8.042094  | 5.785646  | 12.415349 |
| C | 13.824446 | 6.706371  | 11.282634 |
| C | 14.770464 | 7.750340  | 11.153573 |
| H | 14.425791 | 8.779891  | 11.003308 |
| C | 14.300306 | 5.390428  | 11.471885 |
| H | 13.597746 | 4.553243  | 11.543452 |
| C | 16.605358 | 6.175525  | 11.436364 |
| H | 17.679773 | 5.970100  | 11.498818 |
| C | 15.677340 | 5.128501  | 11.549909 |
| H | 16.023392 | 4.099249  | 11.697950 |
| C | 16.146032 | 7.488272  | 11.236759 |
| H | 16.861043 | 8.314071  | 11.145306 |
| C | 13.112190 | 9.603033  | 8.063189  |
| H | 13.065627 | 10.386385 | 7.284974  |
| H | 13.579336 | 10.045230 | 8.963097  |
| H | 9.828263  | 7.124685  | 8.316785  |

---

**Table S40.**  $[\text{CpNi}^{\text{II}}(\text{pdt})(\text{H}_2)\text{Fe}^{\text{II}}(\text{dppe})(\text{CO})]^+$  in Cycle A with pdt Oriented Toward Ni ( $[\text{H}_2\mathbf{1a}]^+$ ,  $-3205.37137313 E_h$ )

| atom | x         | y         | z         |
|------|-----------|-----------|-----------|
| Ni   | 2.331744  | 6.013534  | 1.528735  |
| Fe   | 1.974198  | 5.980039  | 4.513685  |
| S    | 1.279773  | 7.485457  | 2.800823  |
| P    | 2.740016  | 7.550047  | 5.947787  |
| O    | -0.416172 | 5.862045  | 6.178346  |
| C    | 4.236571  | 6.130325  | 0.614054  |
| H    | 5.167713  | 6.202802  | 1.176482  |
| C    | 3.405868  | 7.215891  | 0.185117  |
| H    | 3.596837  | 8.276836  | 0.357837  |
| C    | 2.307928  | 6.682807  | -0.617579 |
| H    | 1.535653  | 7.279897  | -1.105140 |
| C    | -0.500306 | 7.184288  | 2.325701  |
| H    | -1.079569 | 8.010646  | 2.775424  |
| H    | -0.524897 | 7.314914  | 1.229449  |
| C    | -1.115128 | 5.842934  | 2.739346  |
| H    | -2.130435 | 5.795829  | 2.294809  |
| H    | -1.264635 | 5.827462  | 3.830192  |
| C    | 0.508588  | 5.901752  | 5.452201  |
| C    | 2.996532  | 6.630021  | 7.557360  |
| C    | 5.523032  | 8.166758  | 6.327048  |
| H    | 5.476761  | 7.639290  | 7.285658  |
| C    | 6.738701  | 8.752953  | 5.932685  |
| H    | 7.616682  | 8.665364  | 6.581724  |
| C    | 6.823434  | 9.455259  | 4.721015  |
| H    | 7.769974  | 9.915664  | 4.418872  |
| C    | 5.688146  | 9.573245  | 3.900025  |
| H    | 5.745987  | 10.132193 | 2.959815  |
| C    | 4.475184  | 8.984447  | 4.284367  |
| H    | 3.592117  | 9.086588  | 3.641813  |
| C    | 2.309166  | 9.993253  | 7.276765  |
| H    | 3.346996  | 9.891084  | 7.613794  |
| C    | 1.738266  | 9.023586  | 6.420303  |
| C    | 0.413988  | 9.193529  | 5.968398  |
| H    | -0.031811 | 8.459639  | 5.291996  |
| C    | -0.334542 | 10.308390 | 6.378968  |
| H    | -1.362568 | 10.432553 | 6.022366  |
| C    | 0.233219  | 11.260687 | 7.239050  |
| H    | -0.351671 | 12.130193 | 7.557161  |
| C    | 1.556275  | 11.102374 | 7.686285  |
| H    | 2.006027  | 11.847335 | 8.351250  |
| H    | 3.548928  | 7.243931  | 8.291218  |
| H    | 4.762990  | 5.419742  | 7.090386  |
| H    | 1.980647  | 6.480170  | 7.966975  |
| S    | 1.430582  | 4.431942  | 2.780207  |
| C    | -0.370399 | 4.575574  | 2.305627  |
| H    | -0.870135 | 3.689701  | 2.737663  |
| H    | -0.381345 | 4.462256  | 1.207164  |
| C    | 3.690331  | 5.278753  | 7.308762  |
| C    | 4.362424  | 3.517702  | 5.033646  |
| C    | 5.559378  | 4.218324  | 4.758813  |

|   |           |          |           |
|---|-----------|----------|-----------|
| H | 5.668103  | 5.274251 | 5.037606  |
| C | 6.628435  | 3.571096 | 4.122071  |
| H | 7.556356  | 4.119966 | 3.928255  |
| C | 6.510388  | 2.223860 | 3.738583  |
| H | 7.346704  | 1.719632 | 3.242922  |
| C | 5.318695  | 1.527702 | 3.993256  |
| H | 5.219457  | 0.478343 | 3.695767  |
| C | 4.247378  | 2.168210 | 4.637290  |
| H | 3.325342  | 1.613852 | 4.837375  |
| C | 2.416276  | 2.264407 | 7.605471  |
| H | 3.410671  | 2.466032 | 8.019295  |
| C | 1.913715  | 3.035178 | 6.530706  |
| C | 0.651745  | 2.714395 | 5.989434  |
| H | 0.262524  | 3.286761 | 5.143112  |
| C | -0.104413 | 1.659421 | 6.525357  |
| H | -1.085189 | 1.423931 | 6.098846  |
| C | 0.393476  | 0.912494 | 7.603646  |
| H | -0.198809 | 0.093006 | 8.024201  |
| C | 1.657268  | 1.213631 | 8.139640  |
| H | 2.056113  | 0.627104 | 8.974043  |
| H | 3.619251  | 4.632966 | 8.200340  |
| C | 3.564251  | 4.929688 | 0.223248  |
| H | 3.895583  | 3.911279 | 0.434729  |
| C | 2.402490  | 5.284761 | -0.591049 |
| H | 1.717708  | 4.572100 | -1.053786 |
| C | 4.380863  | 8.274609 | 5.504422  |
| P | 2.936914  | 4.394790 | 5.818303  |
| H | 3.257283  | 6.059140 | 3.286218  |
| H | 3.583541  | 6.089894 | 4.072041  |

---

**Table S41.**  $[\text{CpNi}^{\text{II}}(\text{pdt})(\text{H}_2)\text{Fe}^{\text{II}}(\text{dppe})(\text{CO})]^+$  in Cycle A with pdt Oriented Toward Fe ( $[\text{H}_2\mathbf{1a}]^+$ ,  $-3205.37563093 E_h$ )

| atom | x         | y         | z         |
|------|-----------|-----------|-----------|
| Ni   | 2.277670  | 6.021159  | 1.501438  |
| Fe   | 2.004562  | 5.977391  | 4.494989  |
| S    | 1.270530  | 7.489604  | 2.821045  |
| P    | 2.743963  | 7.547573  | 5.950428  |
| O    | -0.544675 | 5.830260  | 5.898502  |
| C    | 4.180839  | 6.130759  | 0.596140  |
| H    | 5.110068  | 6.185929  | 1.163812  |
| C    | 3.363257  | 7.229095  | 0.175507  |
| H    | 3.562856  | 8.286138  | 0.362278  |
| C    | 2.270121  | 6.717077  | -0.649747 |
| H    | 1.507917  | 7.329284  | -1.134396 |
| C    | -0.549502 | 7.170507  | 2.547455  |
| H    | -1.049580 | 7.215791  | 3.530862  |
| H    | -0.901418 | 8.029067  | 1.949630  |
| C    | -0.873261 | 5.862916  | 1.817136  |
| H    | -0.431156 | 5.897286  | 0.804225  |
| H    | -1.973943 | 5.807703  | 1.689734  |
| C    | 0.479645  | 5.885181  | 5.324281  |
| C    | 2.990964  | 6.625446  | 7.559545  |
| C    | 5.524923  | 8.167694  | 6.352065  |
| H    | 5.470560  | 7.645924  | 7.313379  |
| C    | 6.744089  | 8.751251  | 5.964365  |
| H    | 7.616787  | 8.666722  | 6.620898  |
| C    | 6.839009  | 9.447037  | 4.749693  |
| H    | 7.788230  | 9.905221  | 4.452631  |
| C    | 5.710260  | 9.561519  | 3.919248  |
| H    | 5.775772  | 10.115880 | 2.976812  |
| C    | 4.494105  | 8.975128  | 4.297126  |
| H    | 3.615801  | 9.075058  | 3.647717  |
| C    | 2.340956  | 10.013534 | 7.248088  |
| H    | 3.391416  | 9.926474  | 7.547775  |
| C    | 1.748632  | 9.024465  | 6.428979  |
| C    | 0.406557  | 9.174950  | 6.025819  |
| H    | -0.058984 | 8.427295  | 5.379489  |
| C    | -0.337650 | 10.289058 | 6.446205  |
| H    | -1.379422 | 10.396960 | 6.126132  |
| C    | 0.252357  | 11.260923 | 7.268492  |
| H    | -0.328669 | 12.130292 | 7.593974  |
| C    | 1.592730  | 11.122003 | 7.667926  |
| H    | 2.059907  | 11.881908 | 8.303336  |
| H    | 3.529541  | 7.242558  | 8.301156  |
| H    | 4.769984  | 5.435630  | 7.092630  |
| H    | 1.971817  | 6.464789  | 7.957548  |
| S    | 1.428244  | 4.430349  | 2.785368  |
| C    | -0.416134 | 4.578661  | 2.517699  |
| H    | -0.909644 | 4.460623  | 3.498694  |
| H    | -0.681755 | 3.703687  | 1.899276  |
| C    | 3.699313  | 5.282431  | 7.312370  |
| C    | 4.382360  | 3.509456  | 5.052147  |
| C    | 5.580582  | 4.208193  | 4.778006  |

|   |           |          |           |
|---|-----------|----------|-----------|
| H | 5.688336  | 5.265739 | 5.051187  |
| C | 6.652627  | 3.556984 | 4.150388  |
| H | 7.581310  | 4.104729 | 3.956993  |
| C | 6.536545  | 2.207176 | 3.775507  |
| H | 7.375063  | 1.699817 | 3.286823  |
| C | 5.343990  | 1.512465 | 4.030013  |
| H | 5.246365  | 0.461005 | 3.739453  |
| C | 4.269693  | 2.157151 | 4.664911  |
| H | 3.347079  | 1.603794 | 4.865334  |
| C | 2.425801  | 2.283147 | 7.634274  |
| H | 3.416145  | 2.493124 | 8.053385  |
| C | 1.929468  | 3.037728 | 6.544997  |
| C | 0.674273  | 2.702525 | 5.997358  |
| H | 0.291776  | 3.256029 | 5.136363  |
| C | -0.082603 | 1.652022 | 6.541175  |
| H | -1.057837 | 1.405968 | 6.108026  |
| C | 0.408233  | 0.923125 | 7.634773  |
| H | -0.184330 | 0.107237 | 8.061876  |
| C | 1.666376  | 1.237002 | 8.176779  |
| H | 2.060826  | 0.663651 | 9.022367  |
| H | 3.636777  | 4.636747 | 8.204490  |
| C | 3.498263  | 4.942536 | 0.183336  |
| H | 3.818352  | 3.917873 | 0.382093  |
| C | 2.351503  | 5.319727 | -0.643391 |
| H | 1.664949  | 4.619549 | -1.122112 |
| C | 4.389367  | 8.271040 | 5.519740  |
| P | 2.952736  | 4.393002 | 5.822515  |
| H | 3.277500  | 6.061604 | 3.287746  |
| H | 3.618269  | 6.090193 | 4.062797  |

---

**Table S42.**  $[\text{CpNi}^{\text{II}}(\text{pdt})(\text{H}_2)\text{Fe}^{\text{II}}(\text{dppe})(\text{CO})]^+$  in Cycle B with pdt Oriented Toward Ni ( $[\text{H}_2\mathbf{1a}]^+$ ,  $-3205.36262279 E_h$ )

| atom | x         | y         | z         |
|------|-----------|-----------|-----------|
| Ni   | 2.459279  | 6.112966  | 1.723823  |
| Fe   | 2.126568  | 6.226291  | 4.698586  |
| S    | 1.518089  | 7.717471  | 2.928500  |
| P    | 2.926773  | 4.687246  | 6.185451  |
| O    | 3.376033  | 8.464367  | 6.103395  |
| C    | 4.399163  | 5.987892  | 0.906725  |
| H    | 5.301162  | 5.946304  | 1.518429  |
| C    | 3.738524  | 7.166398  | 0.433693  |
| H    | 4.050502  | 8.195661  | 0.621718  |
| C    | 2.632526  | 6.767573  | -0.434497 |
| H    | 1.967200  | 7.455041  | -0.959403 |
| C    | -0.305540 | 7.562590  | 2.569260  |
| H    | -0.842640 | 7.621436  | 3.531325  |
| H    | -0.552733 | 8.468502  | 1.988035  |
| C    | -0.695312 | 6.311839  | 1.779199  |
| H    | -0.171831 | 6.324265  | 0.805359  |
| H    | -1.782062 | 6.365449  | 1.563845  |
| C    | 2.855144  | 7.556687  | 5.572446  |
| C    | 2.303657  | 5.284630  | 7.840224  |
| C    | 1.707270  | 2.243895  | 7.059279  |
| H    | 1.441436  | 2.752679  | 7.991563  |
| C    | 1.361534  | 0.890519  | 6.904070  |
| H    | 0.825662  | 0.373957  | 7.707639  |
| C    | 1.714371  | 0.202117  | 5.732826  |
| H    | 1.447790  | -0.853557 | 5.615467  |
| C    | 2.419876  | 0.868039  | 4.716366  |
| H    | 2.706675  | 0.333471  | 3.804627  |
| C    | 2.761914  | 2.219710  | 4.864438  |
| H    | 3.320788  | 2.724818  | 4.069924  |
| C    | 5.318238  | 3.382892  | 6.974658  |
| H    | 4.676612  | 2.529615  | 7.216231  |
| C    | 4.760161  | 4.557552  | 6.419639  |
| C    | 5.613524  | 5.639595  | 6.108787  |
| H    | 5.211346  | 6.566163  | 5.688721  |
| C    | 6.993630  | 5.548787  | 6.349006  |
| H    | 7.641389  | 6.397056  | 6.103477  |
| C    | 7.538891  | 4.377752  | 6.898226  |
| H    | 8.616391  | 4.306477  | 7.080402  |
| C    | 6.698289  | 3.297434  | 7.211731  |
| H    | 7.116285  | 2.380177  | 7.640068  |
| H    | 2.534869  | 4.560829  | 8.642270  |
| H    | 0.203342  | 4.676710  | 7.859129  |
| H    | 2.889665  | 6.196588  | 8.052998  |
| S    | 1.336641  | 4.674168  | 3.004191  |
| C    | -0.426657 | 4.980364  | 2.487905  |
| H    | -1.054652 | 4.869634  | 3.383955  |
| H    | -0.659120 | 4.143085  | 1.806546  |
| C    | 0.802922  | 5.597145  | 7.763425  |
| C    | -1.305585 | 5.536245  | 5.776473  |
| C    | -1.350168 | 4.122299  | 5.784311  |

|   |           |           |           |
|---|-----------|-----------|-----------|
| H | -0.446700 | 3.537369  | 5.991503  |
| C | -2.548516 | 3.448242  | 5.504606  |
| H | -2.568733 | 2.353253  | 5.521191  |
| C | -3.714081 | 4.172587  | 5.201700  |
| H | -4.648684 | 3.644596  | 4.984882  |
| C | -3.675529 | 5.575763  | 5.180347  |
| H | -4.580618 | 6.148224  | 4.950339  |
| C | -2.479930 | 6.256244  | 5.464569  |
| H | -2.469865 | 7.350943  | 5.462786  |
| C | -1.097338 | 8.250836  | 7.739118  |
| H | -1.448090 | 7.373119  | 8.293873  |
| C | -0.246851 | 8.097699  | 6.616997  |
| C | 0.149385  | 9.245761  | 5.900517  |
| H | 0.799510  | 9.152391  | 5.025139  |
| C | -0.280392 | 10.521135 | 6.305250  |
| H | 0.042213  | 11.403040 | 5.741777  |
| C | -1.110453 | 10.663649 | 7.426523  |
| H | -1.440124 | 11.658523 | 7.744132  |
| C | -1.521421 | 9.524781  | 8.141168  |
| H | -2.175989 | 9.627538  | 9.013255  |
| H | 0.501510  | 6.271541  | 8.582599  |
| C | 3.604946  | 4.877180  | 0.473168  |
| H | 3.799072  | 3.825655  | 0.693410  |
| C | 2.551473  | 5.369348  | -0.411609 |
| H | 1.810929  | 4.746265  | -0.915536 |
| C | 2.407504  | 2.924305  | 6.038453  |
| P | 0.300652  | 6.400250  | 6.113460  |
| H | 3.291928  | 6.105003  | 3.403795  |
| H | 3.637511  | 5.954081  | 4.204562  |

---

**Table S43.**  $[\text{CpNi}^{\text{II}}(\text{pdt})(\text{H}_2)\text{Fe}^{\text{II}}(\text{dppe})(\text{CO})]^+$  in Cycle B with pdt Oriented Toward Fe ( $[\text{H}_2\mathbf{1a}]^+$ ,  $-3205.35830320 E_h$ )

| atom | x         | y         | z         |
|------|-----------|-----------|-----------|
| Ni   | 2.538775  | 5.997677  | 1.744333  |
| Fe   | 2.105919  | 6.276014  | 4.703687  |
| S    | 1.828679  | 7.798789  | 2.821611  |
| P    | 2.901170  | 4.733635  | 6.186769  |
| O    | 3.266846  | 8.538116  | 6.142455  |
| C    | 4.437984  | 5.513102  | 0.945184  |
| H    | 5.321109  | 5.340415  | 1.561367  |
| C    | 3.986232  | 6.770042  | 0.431433  |
| H    | 4.469012  | 7.737034  | 0.585398  |
| C    | 2.817622  | 6.537974  | -0.413971 |
| H    | 2.275398  | 7.309844  | -0.962711 |
| C    | 0.091850  | 7.937852  | 2.174453  |
| H    | -0.269321 | 8.938534  | 2.472057  |
| H    | 0.186436  | 7.923700  | 1.074095  |
| C    | -0.875550 | 6.870541  | 2.677481  |
| H    | -1.860790 | 7.046628  | 2.199411  |
| H    | -1.032223 | 7.019055  | 3.757083  |
| C    | 2.796972  | 7.611638  | 5.596169  |
| C    | 2.282147  | 5.331260  | 7.840729  |
| C    | 1.781658  | 2.257385  | 7.096216  |
| H    | 1.591868  | 2.740376  | 8.060188  |
| C    | 1.434771  | 0.905586  | 6.935082  |
| H    | 0.976176  | 0.362287  | 7.768179  |
| C    | 1.684926  | 0.252987  | 5.717435  |
| H    | 1.417179  | -0.801885 | 5.595486  |
| C    | 2.286301  | 0.954047  | 4.658508  |
| H    | 2.489972  | 0.447819  | 3.709020  |
| C    | 2.627972  | 2.305396  | 4.812412  |
| H    | 3.101167  | 2.840967  | 3.982564  |
| C    | 5.340214  | 3.379182  | 6.743771  |
| H    | 4.729416  | 2.477864  | 6.850739  |
| C    | 4.738729  | 4.610032  | 6.396093  |
| C    | 5.554571  | 5.756955  | 6.262847  |
| H    | 5.119744  | 6.726610  | 6.004019  |
| C    | 6.939078  | 5.673054  | 6.475250  |
| H    | 7.556142  | 6.571821  | 6.370833  |
| C    | 7.528497  | 4.445060  | 6.816318  |
| H    | 8.609979  | 4.380222  | 6.975895  |
| C    | 6.726165  | 3.301281  | 6.951175  |
| H    | 7.177517  | 2.339659  | 7.217885  |
| H    | 2.529756  | 4.619150  | 8.648185  |
| H    | 0.200507  | 4.671905  | 7.847689  |
| H    | 2.850422  | 6.256409  | 8.044136  |
| S    | 1.165535  | 4.813422  | 3.025547  |
| C    | -0.496457 | 5.411053  | 2.412997  |
| H    | -1.239944 | 4.748479  | 2.887483  |
| H    | -0.485630 | 5.194672  | 1.329768  |
| C    | 0.775061  | 5.609275  | 7.759950  |
| C    | -1.298464 | 5.431764  | 5.764258  |
| C    | -1.200791 | 4.032965  | 5.580186  |



|   |           |           |           |
|---|-----------|-----------|-----------|
| H | -0.226628 | 3.534211  | 5.625454  |
| C | -2.350783 | 3.267697  | 5.331435  |
| H | -2.259289 | 2.184596  | 5.196599  |
| C | -3.609636 | 3.887097  | 5.253693  |
| H | -4.506200 | 3.288704  | 5.060053  |
| C | -3.712891 | 5.276391  | 5.426807  |
| H | -4.690402 | 5.767470  | 5.370776  |
| C | -2.565993 | 6.047167  | 5.679264  |
| H | -2.664091 | 7.128647  | 5.815950  |
| C | -1.164682 | 8.247829  | 7.728211  |
| H | -1.464205 | 7.384728  | 8.333521  |
| C | -0.349746 | 8.074562  | 6.583635  |
| C | -0.013141 | 9.204082  | 5.808708  |
| H | 0.622048  | 9.088938  | 4.924616  |
| C | -0.470035 | 10.481242 | 6.173793  |
| H | -0.191427 | 11.349784 | 5.567635  |
| C | -1.269485 | 10.643825 | 7.315008  |
| H | -1.620846 | 11.640341 | 7.602737  |
| C | -1.618189 | 9.524318  | 8.090279  |
| H | -2.245606 | 9.644055  | 8.979965  |
| H | 0.454318  | 6.272843  | 8.580668  |
| C | 3.464548  | 4.539168  | 0.550586  |
| H | 3.478240  | 3.478077  | 0.806760  |
| C | 2.499633  | 5.173778  | -0.343198 |
| H | 1.660140  | 4.669909  | -0.824817 |
| C | 2.378350  | 2.972736  | 6.034170  |
| P | 0.255655  | 6.393831  | 6.103073  |
| H | 3.300702  | 5.990086  | 3.437145  |
| H | 3.638443  | 6.031978  | 4.251732  |

---

**Table S44.**  $[\text{CpNi}^{\text{II}}(\text{pdt})(\text{H}_2)\text{Fe}^{\text{II}}(\text{dppe})(\text{CO})]^+$  Transition State with pdt Oriented Toward Ni ( $[\text{H}_2\mathbf{1a}]^+$ ,  $-3205.32955903 E_{\text{h}}$ )

| atom | x         | y         | z         |
|------|-----------|-----------|-----------|
| Ni   | 10.736536 | 9.120781  | 6.620028  |
| Fe   | 10.968802 | 6.950181  | 8.888038  |
| P    | 12.006783 | 6.977916  | 10.871523 |
| S    | 11.704249 | 9.294353  | 8.596854  |
| P    | 9.315712  | 5.921268  | 10.013912 |
| S    | 11.618290 | 7.100712  | 6.467995  |
| C    | 7.197889  | 2.438969  | 9.286744  |
| H    | 6.550811  | 1.769089  | 9.862949  |
| C    | 7.455055  | 2.179475  | 7.929116  |
| H    | 7.011782  | 1.302198  | 7.446185  |
| C    | 10.339350 | 10.222337 | 12.889993 |
| H    | 9.659971  | 11.049640 | 12.658393 |
| C    | 6.725678  | 6.892607  | 9.462033  |
| H    | 6.785225  | 6.264775  | 8.566243  |
| C    | 10.865147 | 10.081270 | 14.182983 |
| H    | 10.597806 | 10.797784 | 14.967031 |
| C    | 9.549669  | 9.251419  | 4.890054  |
| H    | 9.244550  | 8.375254  | 4.314271  |
| C    | 11.739354 | 9.018278  | 14.470352 |
| H    | 12.153929 | 8.901941  | 15.477433 |
| C    | 11.683866 | 5.416020  | 8.564101  |
| C    | 8.852684  | 4.168523  | 7.814303  |
| H    | 9.499269  | 4.836579  | 7.235230  |
| C    | 8.842174  | 9.819152  | 5.995839  |
| H    | 7.905920  | 9.462673  | 6.426237  |
| C    | 13.903161 | 8.779907  | 6.805956  |
| H    | 13.487448 | 9.481064  | 6.058617  |
| H    | 15.007530 | 8.828112  | 6.715973  |
| C    | 5.467922  | 8.445223  | 10.851959 |
| H    | 4.564210  | 9.036085  | 11.034943 |
| C    | 8.609297  | 4.428743  | 9.178276  |
| C    | 8.276146  | 3.047407  | 7.193827  |
| H    | 8.476312  | 2.852443  | 6.134947  |
| C    | 12.090836 | 8.105142  | 13.465884 |
| H    | 12.792310 | 7.296456  | 13.700446 |
| C    | 9.646920  | 10.904044 | 6.475212  |
| H    | 9.425191  | 11.531789 | 7.340581  |
| O    | 12.220624 | 4.394837  | 8.311320  |
| C    | 9.956336  | 5.300139  | 11.676240 |
| H    | 9.520902  | 5.935989  | 12.465052 |
| H    | 9.597778  | 4.269665  | 11.837828 |
| C    | 6.522548  | 8.465288  | 11.778023 |
| H    | 6.446116  | 9.070880  | 12.687462 |
| C    | 11.488995 | 5.379444  | 11.709055 |
| H    | 11.942381 | 4.543456  | 11.149644 |
| H    | 11.874999 | 5.342984  | 12.741991 |
| C    | 11.565375 | 8.239960  | 12.157631 |
| C    | 7.764357  | 3.560478  | 9.908190  |
| H    | 7.530577  | 3.764872  | 10.959529 |
| C    | 10.705797 | 10.094289 | 4.587553  |

|   |           |           |           |
|---|-----------|-----------|-----------|
| H | 11.413050 | 9.921715  | 3.774693  |
| C | 10.762489 | 11.107167 | 5.553920  |
| H | 11.524133 | 11.882644 | 5.648608  |
| C | 5.573849  | 7.659098  | 9.692334  |
| H | 4.751876  | 7.630442  | 8.968960  |
| C | 13.463662 | 7.355087  | 6.457535  |
| H | 13.900571 | 6.610324  | 7.144819  |
| H | 13.782063 | 7.101931  | 5.431176  |
| C | 10.682992 | 9.304328  | 11.882083 |
| H | 10.267106 | 9.419126  | 10.877621 |
| C | 7.791465  | 6.906074  | 10.391468 |
| C | 7.681871  | 7.707194  | 11.548329 |
| H | 8.497128  | 7.756483  | 12.276345 |
| C | 13.855263 | 6.922660  | 10.932082 |
| C | 14.608498 | 8.019533  | 11.410364 |
| H | 14.099999 | 8.917257  | 11.776023 |
| C | 14.537677 | 5.776746  | 10.459448 |
| H | 13.983805 | 4.920357  | 10.062898 |
| C | 16.679607 | 6.815308  | 10.973802 |
| H | 17.773607 | 6.770691  | 10.995768 |
| C | 15.939399 | 5.724095  | 10.488420 |
| H | 16.452776 | 4.824815  | 10.131507 |
| C | 16.011520 | 7.962472  | 11.430425 |
| H | 16.581131 | 8.818041  | 11.808978 |
| C | 13.532656 | 9.253850  | 8.214033  |
| H | 13.869371 | 10.295422 | 8.358513  |
| H | 14.015370 | 8.629941  | 8.983532  |
| H | 9.435307  | 7.273173  | 8.247320  |
| H | 9.764850  | 7.974065  | 7.885597  |

---

**Table S45.**  $[\text{CpNi}^{\text{II}}(\text{pdt})(\text{H}_2)\text{Fe}^{\text{II}}(\text{dppe})(\text{CO})]^+$  Transition State with pdt Oriented Toward Fe ( $[\text{H}_2\mathbf{1a}]^+$ ,  $-3205.33003368 E_{\text{h}}$ )

| atom | x         | y         | z         |
|------|-----------|-----------|-----------|
| Ni   | 10.687939 | 9.134404  | 6.643926  |
| Fe   | 10.981739 | 6.937034  | 8.889657  |
| P    | 12.021742 | 6.951737  | 10.876097 |
| S    | 11.670891 | 9.295399  | 8.608514  |
| P    | 9.315736  | 5.923339  | 10.010106 |
| S    | 11.593078 | 7.137372  | 6.435338  |
| C    | 7.215020  | 2.425084  | 9.308493  |
| H    | 6.564367  | 1.760968  | 9.887328  |
| C    | 7.485509  | 2.148696  | 7.956833  |
| H    | 7.049279  | 1.263910  | 7.481248  |
| C    | 10.359761 | 10.200803 | 12.896350 |
| H    | 9.662597  | 11.015782 | 12.674044 |
| C    | 6.733494  | 6.886979  | 9.412286  |
| H    | 6.806266  | 6.249858  | 8.524032  |
| C    | 10.922247 | 10.082057 | 14.175988 |
| H    | 10.665338 | 10.803369 | 14.959119 |
| C    | 9.523777  | 9.308375  | 4.900272  |
| H    | 9.221400  | 8.446742  | 4.301693  |
| C    | 11.820282 | 9.035721  | 14.450904 |
| H    | 12.263862 | 8.937120  | 15.447462 |
| C    | 11.706863 | 5.407478  | 8.557592  |
| C    | 8.877948  | 4.140570  | 7.829141  |
| H    | 9.526847  | 4.803408  | 7.246886  |
| C    | 8.802097  | 9.859536  | 6.005522  |
| H    | 7.856375  | 9.500733  | 6.412491  |
| C    | 14.061350 | 8.012015  | 7.590852  |
| H    | 15.134219 | 8.190669  | 7.375710  |
| H    | 14.022320 | 7.231096  | 8.368861  |
| C    | 5.454284  | 8.452374  | 10.767912 |
| H    | 4.547197  | 9.043568  | 10.932130 |
| C    | 8.621953  | 4.417541  | 9.187617  |
| C    | 8.310548  | 3.009771  | 7.217946  |
| H    | 8.520598  | 2.802264  | 6.163375  |
| C    | 12.158766 | 8.117007  | 13.447265 |
| H    | 12.878268 | 7.321111  | 13.670537 |
| C    | 9.605915  | 10.926836 | 6.522836  |
| H    | 9.373770  | 11.537495 | 7.397547  |
| O    | 12.253721 | 4.393064  | 8.302994  |
| C    | 9.934605  | 5.327388  | 11.688918 |
| H    | 9.514713  | 5.993864  | 12.460662 |
| H    | 9.550785  | 4.310531  | 11.876458 |
| C    | 6.496143  | 8.484389  | 11.707924 |
| H    | 6.406183  | 9.099604  | 12.609647 |
| C    | 11.468133 | 5.369888  | 11.722333 |
| H    | 11.898330 | 4.518162  | 11.168314 |
| H    | 11.853104 | 5.332346  | 12.755738 |
| C    | 11.595787 | 8.229184  | 12.152653 |
| C    | 7.772551  | 3.556180  | 9.920581  |
| H    | 7.527640  | 3.773419  | 10.966756 |
| C    | 10.696316 | 10.141126 | 4.641786  |

|   |           |           |           |
|---|-----------|-----------|-----------|
| H | 11.417888 | 9.979702  | 3.839276  |
| C | 10.744394 | 11.133371 | 5.632171  |
| H | 11.512609 | 11.897942 | 5.757902  |
| C | 5.577373  | 7.653803  | 9.618493  |
| H | 4.765389  | 7.615723  | 8.884348  |
| C | 13.412745 | 7.475921  | 6.313205  |
| H | 13.881017 | 6.517522  | 6.027651  |
| H | 13.528274 | 8.179481  | 5.469168  |
| C | 10.690315 | 9.276933  | 11.889195 |
| H | 10.247377 | 9.376316  | 10.894725 |
| C | 7.786364  | 6.911823  | 10.356163 |
| C | 7.659528  | 7.725457  | 11.502579 |
| H | 8.464261  | 7.783873  | 12.241667 |
| C | 13.866773 | 6.872621  | 10.957677 |
| C | 14.626164 | 8.010053  | 11.315243 |
| H | 14.121680 | 8.940258  | 11.597146 |
| C | 14.541266 | 5.677090  | 10.615663 |
| H | 13.982098 | 4.785994  | 10.313752 |
| C | 16.689630 | 6.754705  | 11.006930 |
| H | 17.783431 | 6.706992  | 11.031431 |
| C | 15.942940 | 5.620248  | 10.647731 |
| H | 16.450856 | 4.684265  | 10.391846 |
| C | 16.028608 | 7.948623  | 11.338136 |
| H | 16.604066 | 8.835616  | 11.624454 |
| C | 13.483049 | 9.312397  | 8.152774  |
| H | 13.592348 | 10.148705 | 7.439402  |
| H | 14.018852 | 9.580704  | 9.079377  |
| H | 9.457852  | 7.228382  | 8.219722  |
| H | 9.766304  | 7.947089  | 7.859746  |

---

**Table S46.** [CpNi<sup>II</sup>(pdt)Fe<sup>II</sup>(dppv)(CO)]<sup>+</sup> with pdt Oriented Toward Ni  
 ([1b]<sup>+</sup>, -3202.98799965 E<sub>h</sub>)

| atom | x         | y         | z         |
|------|-----------|-----------|-----------|
| Ni   | 10.441312 | 8.705691  | 7.422905  |
| Fe   | 11.667542 | 6.832880  | 8.733993  |
| P    | 11.413405 | 6.788047  | 10.989003 |
| S    | 12.148330 | 9.033524  | 8.771636  |
| P    | 10.502159 | 4.898555  | 8.718405  |
| S    | 11.522215 | 7.034432  | 6.490883  |
| C    | 10.785404 | 1.067761  | 7.180391  |
| H    | 10.174633 | 0.158764  | 7.196859  |
| C    | 12.022686 | 1.076407  | 6.512905  |
| H    | 12.379166 | 0.171727  | 6.009012  |
| C    | 7.969491  | 8.865625  | 11.930218 |
| H    | 7.010591  | 9.064832  | 11.438688 |
| C    | 7.697670  | 5.222690  | 9.125201  |
| H    | 7.928996  | 5.293972  | 10.193905 |
| C    | 8.206462  | 9.341511  | 13.231048 |
| H    | 7.435464  | 9.917370  | 13.753915 |
| C    | 9.589890  | 10.655005 | 7.148093  |
| H    | 10.136312 | 11.589706 | 7.284249  |
| C    | 9.432556  | 9.073302  | 13.860290 |
| H    | 9.620581  | 9.437165  | 14.876115 |
| C    | 13.247299 | 6.147881  | 8.859112  |
| C    | 12.343287 | 3.406524  | 7.137808  |
| H    | 12.955816 | 4.311084  | 7.117288  |
| C    | 9.446896  | 9.928612  | 5.941340  |
| H    | 9.852810  | 10.195573 | 4.964805  |
| C    | 13.399328 | 9.198657  | 6.178730  |
| H    | 12.587787 | 9.856036  | 5.814731  |
| H    | 14.324543 | 9.510379  | 5.652257  |
| C    | 6.052822  | 5.236884  | 7.328336  |
| H    | 5.012887  | 5.319309  | 6.994928  |
| C    | 11.105408 | 3.405081  | 7.811552  |
| C    | 12.797927 | 2.245546  | 6.490519  |
| H    | 13.761056 | 2.258347  | 5.969313  |
| C    | 10.424252 | 8.333057  | 13.196356 |
| H    | 11.372759 | 8.124792  | 13.700757 |
| C    | 8.697671  | 8.724883  | 6.249898  |
| H    | 8.446122  | 7.934961  | 5.540751  |
| O    | 14.360405 | 5.765932  | 8.873788  |
| C    | 7.077811  | 5.013966  | 6.391776  |
| H    | 6.837481  | 4.917583  | 5.327196  |
| C    | 10.802590 | 5.110080  | 11.445900 |
| C    | 10.197333 | 7.863381  | 11.884602 |
| C    | 10.325317 | 2.224917  | 7.823690  |
| H    | 9.349862  | 2.212171  | 8.323335  |
| C    | 8.905891  | 9.919609  | 8.205648  |
| H    | 8.854735  | 10.225392 | 9.251632  |
| C    | 8.310740  | 8.756952  | 7.632202  |
| H    | 7.713706  | 7.999206  | 8.140162  |
| C    | 6.364799  | 5.337864  | 8.694340  |
| H    | 5.568591  | 5.492696  | 9.430754  |

|   |           |           |           |
|---|-----------|-----------|-----------|
| C | 13.097966 | 7.750799  | 5.788120  |
| H | 13.910357 | 7.072527  | 6.104256  |
| H | 12.985522 | 7.665084  | 4.693438  |
| C | 8.960987  | 8.133473  | 11.259110 |
| H | 8.780425  | 7.765183  | 10.243340 |
| C | 8.730563  | 4.997270  | 8.189152  |
| C | 8.410078  | 4.892622  | 6.816329  |
| H | 9.199591  | 4.697279  | 6.082272  |
| C | 12.983255 | 6.975341  | 11.931577 |
| C | 13.545943 | 8.260317  | 12.109436 |
| H | 13.014645 | 9.148575  | 11.749814 |
| C | 13.684105 | 5.842351  | 12.396757 |
| H | 13.272243 | 4.837650  | 12.249797 |
| C | 15.470170 | 7.272095  | 13.227005 |
| H | 16.434479 | 7.387711  | 13.732992 |
| C | 14.921046 | 5.993500  | 13.044099 |
| H | 15.454937 | 5.107621  | 13.404000 |
| C | 14.781308 | 8.404052  | 12.758265 |
| H | 15.205753 | 9.403917  | 12.899502 |
| C | 13.609057 | 9.425109  | 7.676902  |
| H | 13.835996 | 10.487236 | 7.874017  |
| H | 14.446432 | 8.817802  | 8.064146  |
| C | 10.376493 | 4.299249  | 10.457655 |
| H | 9.956655  | 3.303885  | 10.657004 |
| H | 10.740027 | 4.827846  | 12.505939 |

---

**Table S47.** [CpNi<sup>II</sup>(pdt)Fe<sup>II</sup>(dppv)(CO)]<sup>+</sup> with pdt Oriented Toward Fe ([1b]<sup>+</sup>, -3202.98899445 E<sub>h</sub>)

| atom | x         | y         | z         |
|------|-----------|-----------|-----------|
| Ni   | 10.451857 | 8.673567  | 7.459182  |
| Fe   | 11.711725 | 6.813202  | 8.732220  |
| P    | 11.433190 | 6.790466  | 10.984203 |
| S    | 12.175125 | 9.019610  | 8.772047  |
| P    | 10.512600 | 4.902969  | 8.711069  |
| S    | 11.527227 | 7.027871  | 6.491719  |
| C    | 10.787459 | 1.065713  | 7.189825  |
| H    | 10.189499 | 0.149317  | 7.236822  |
| C    | 11.995458 | 1.085938  | 6.470873  |
| H    | 12.342286 | 0.182668  | 5.957819  |
| C    | 7.960004  | 8.829352  | 11.902463 |
| H    | 6.995180  | 9.002556  | 11.412714 |
| C    | 7.708051  | 5.215978  | 9.133156  |
| H    | 7.942783  | 5.279853  | 10.201507 |
| C    | 8.195559  | 9.333609  | 13.192887 |
| H    | 7.417278  | 9.905343  | 13.709450 |
| C    | 9.630606  | 10.632015 | 7.199801  |
| H    | 10.190579 | 11.555534 | 7.356344  |
| C    | 9.429596  | 9.098869  | 13.819749 |
| H    | 9.616995  | 9.484864  | 14.827474 |
| C    | 13.243025 | 6.032989  | 8.923646  |
| C    | 12.311707 | 3.424023  | 7.067885  |
| H    | 12.909074 | 4.337499  | 7.014209  |
| C    | 9.498354  | 9.920659  | 5.982523  |
| H    | 9.928397  | 10.190349 | 5.017075  |
| C    | 14.056027 | 8.403226  | 6.678097  |
| H    | 14.887047 | 8.822282  | 6.075319  |
| H    | 14.487392 | 7.586122  | 7.281321  |
| C    | 6.055931  | 5.233607  | 7.343106  |
| H    | 5.014161  | 5.311999  | 7.014498  |
| C    | 11.104363 | 3.410395  | 7.794755  |
| C    | 12.753222 | 2.264958  | 6.408182  |
| H    | 13.692753 | 2.286770  | 5.845813  |
| C    | 10.430393 | 8.363433  | 13.164119 |
| H    | 11.384519 | 8.180313  | 13.667421 |
| C    | 8.717828  | 8.730225  | 6.264859  |
| H    | 8.464790  | 7.952285  | 5.543054  |
| O    | 14.309261 | 5.545049  | 9.020417  |
| C    | 7.078510  | 5.024915  | 6.400634  |
| H    | 6.834525  | 4.935687  | 5.336298  |
| C    | 10.820546 | 5.112783  | 11.438740 |
| C    | 10.204402 | 7.865608  | 11.862599 |
| C    | 10.340108 | 2.220914  | 7.845275  |
| H    | 9.385687  | 2.199075  | 8.383825  |
| C    | 8.907324  | 9.902130  | 8.235107  |
| H    | 8.841589  | 10.199461 | 9.282600  |
| C    | 8.302250  | 8.758768  | 7.638649  |
| H    | 7.684463  | 8.005719  | 8.128380  |
| C    | 6.372660  | 5.325440  | 8.708567  |
| H    | 5.578474  | 5.468859  | 9.449440  |



|   |           |           |           |
|---|-----------|-----------|-----------|
| C | 13.015828 | 7.838778  | 5.711338  |
| H | 13.465151 | 7.047340  | 5.084739  |
| H | 12.621541 | 8.618313  | 5.034907  |
| C | 8.960368  | 8.102402  | 11.238978 |
| H | 8.781049  | 7.714094  | 10.230662 |
| C | 8.738338  | 5.005660  | 8.191000  |
| C | 8.413105  | 4.908919  | 6.818870  |
| H | 9.200843  | 4.724881  | 6.080010  |
| C | 12.991509 | 6.987322  | 11.943809 |
| C | 13.559504 | 8.273003  | 12.099152 |
| H | 13.039774 | 9.155204  | 11.708894 |
| C | 13.677172 | 5.862220  | 12.448716 |
| H | 13.262628 | 4.856388  | 12.319319 |
| C | 15.458362 | 7.301479  | 13.273055 |
| H | 16.414932 | 7.423825  | 13.791985 |
| C | 14.904225 | 6.022140  | 13.112621 |
| H | 15.426674 | 5.142190  | 13.502538 |
| C | 14.784561 | 8.425612  | 12.765072 |
| H | 15.212784 | 9.426163  | 12.889008 |
| C | 13.543640 | 9.507220  | 7.601911  |
| H | 13.171576 | 10.377880 | 7.032438  |
| H | 14.356370 | 9.858321  | 8.262722  |
| C | 10.392943 | 4.302893  | 10.450371 |
| H | 9.971052  | 3.308719  | 10.650919 |
| H | 10.756097 | 4.830305  | 12.498555 |

---

**Table S48.**  $[\text{CpNi}^{\text{I}}(\text{pdt})\text{Fe}^{\text{II}}(\text{dppv})(\text{CO})]^0$  with pdt Oriented Toward Ni  
 $([\mathbf{1b}]^0, -3203.15408796 E_{\text{h}})$

| atom | x         | y         | z         |
|------|-----------|-----------|-----------|
| Ni   | 2.575026  | 5.928760  | 2.106496  |
| Fe   | 1.620047  | 5.949297  | 4.417138  |
| S    | 1.108430  | 7.525918  | 2.855222  |
| P    | 2.710520  | 7.506230  | 5.600043  |
| O    | -0.908307 | 5.944944  | 5.862380  |
| C    | 4.743490  | 5.954527  | 2.047189  |
| H    | 5.373589  | 5.979391  | 2.936157  |
| C    | 4.266302  | 7.099089  | 1.323041  |
| H    | 4.427602  | 8.141872  | 1.598610  |
| C    | 3.480048  | 6.624124  | 0.226493  |
| H    | 2.949592  | 7.244083  | -0.499163 |
| C    | -0.572127 | 7.192363  | 2.127416  |
| H    | -1.303414 | 7.216105  | 2.956254  |
| H    | -0.777647 | 8.060168  | 1.474566  |
| C    | -0.699490 | 5.894816  | 1.325570  |
| H    | 0.053577  | 5.890776  | 0.514545  |
| H    | -1.700542 | 5.881514  | 0.843563  |
| C    | 0.156575  | 5.948051  | 5.343276  |
| C    | 5.428681  | 8.136401  | 4.950180  |
| H    | 5.697356  | 7.231750  | 5.507647  |
| C    | 6.437891  | 8.905005  | 4.347644  |
| H    | 7.485127  | 8.595019  | 4.440193  |
| C    | 6.106872  | 10.067546 | 3.632860  |
| H    | 6.894165  | 10.667505 | 3.162949  |
| C    | 4.761185  | 10.459030 | 3.526589  |
| H    | 4.494472  | 11.366355 | 2.972705  |
| C    | 3.751392  | 9.696767  | 4.133770  |
| H    | 2.706310  | 10.012745 | 4.050716  |
| C    | 2.446394  | 9.675850  | 7.429687  |
| H    | 3.518706  | 9.544155  | 7.615607  |
| C    | 1.781219  | 8.852316  | 6.492996  |
| C    | 0.415359  | 9.078155  | 6.235507  |
| H    | -0.103045 | 8.462813  | 5.496626  |
| C    | -0.277539 | 10.095308 | 6.914067  |
| H    | -1.340027 | 10.259201 | 6.701926  |
| C    | 0.385498  | 10.894647 | 7.857034  |
| H    | -0.157108 | 11.684501 | 8.388759  |
| C    | 1.751723  | 10.684471 | 8.112223  |
| H    | 2.279552  | 11.311606 | 8.839797  |
| S    | 1.132411  | 4.327863  | 2.893401  |
| C    | -0.552778 | 4.618815  | 2.158145  |
| H    | -1.284064 | 4.603685  | 2.987188  |
| H    | -0.744972 | 3.732776  | 1.526043  |
| C    | 4.117889  | 3.427236  | 4.911728  |
| C    | 5.462133  | 3.847954  | 4.988233  |
| H    | 5.713561  | 4.775587  | 5.515076  |
| C    | 6.484574  | 3.083775  | 4.402810  |
| H    | 7.525123  | 3.419752  | 4.478463  |
| C    | 6.175316  | 1.892605  | 3.726321  |
| H    | 6.972991  | 1.296085  | 3.269730  |

|   |           |          |           |
|---|-----------|----------|-----------|
| C | 4.838096  | 1.468423 | 3.640895  |
| H | 4.588358  | 0.539002 | 3.116534  |
| C | 3.815181  | 2.226450 | 4.231294  |
| H | 2.776932  | 1.885087 | 4.164769  |
| C | 2.506687  | 2.311781 | 7.519777  |
| H | 3.576329  | 2.466327 | 7.703411  |
| C | 1.828880  | 3.099994 | 6.561970  |
| C | 0.467379  | 2.844597 | 6.309027  |
| H | -0.060245 | 3.432263 | 5.554295  |
| C | -0.209131 | 1.833329 | 7.012462  |
| H | -1.268417 | 1.646157 | 6.803620  |
| C | 0.466106  | 1.069464 | 7.975960  |
| H | -0.063767 | 0.284286 | 8.527099  |
| C | 1.828252  | 1.309101 | 8.226953  |
| H | 2.365618  | 0.709618 | 8.970676  |
| C | 4.294559  | 4.771573 | 1.367371  |
| H | 4.481876  | 3.744240 | 1.681699  |
| C | 3.498320  | 5.185074 | 0.253539  |
| H | 2.983027  | 4.525129 | -0.447347 |
| C | 4.075934  | 8.524146 | 4.852304  |
| P | 2.735802  | 4.439095 | 5.636383  |
| C | 3.585832  | 6.669932 | 6.998669  |
| C | 3.597228  | 5.322836 | 7.014460  |
| H | 4.086489  | 4.758465 | 7.820360  |
| H | 4.065173  | 7.261274 | 7.791087  |

---

**Table S49.**  $[\text{CpNi}^{\text{I}}(\text{pdt})\text{Fe}^{\text{II}}(\text{dppv})(\text{CO})]^0$  with pdt Oriented Toward Fe  
 ( $[\mathbf{1b}]^0$ ,  $-3203.15227771 E_{\text{h}}$ )

| atom | x         | y         | z         |
|------|-----------|-----------|-----------|
| Ni   | 2.576851  | 5.929252  | 2.147481  |
| Fe   | 1.592883  | 5.951091  | 4.439259  |
| S    | 1.102322  | 7.524294  | 2.861651  |
| P    | 2.708555  | 7.502910  | 5.599147  |
| O    | -0.776324 | 5.956392  | 6.142674  |
| C    | 4.764502  | 6.037312  | 2.014416  |
| H    | 5.422972  | 6.139981  | 2.877054  |
| C    | 4.213893  | 7.116623  | 1.248952  |
| H    | 4.340432  | 8.179047  | 1.460037  |
| C    | 3.401675  | 6.549500  | 0.214264  |
| H    | 2.824524  | 7.105779  | -0.527350 |
| C    | -0.524814 | 7.193340  | 2.010566  |
| H    | -1.164071 | 8.066594  | 2.235405  |
| H    | -0.315921 | 7.200880  | 0.924701  |
| C    | -1.246834 | 5.906139  | 2.411775  |
| H    | -2.232610 | 5.893010  | 1.899818  |
| H    | -1.453956 | 5.919401  | 3.496610  |
| C    | 0.206628  | 5.955041  | 5.482314  |
| C    | 5.443827  | 8.136387  | 5.019576  |
| H    | 5.702202  | 7.250281  | 5.610595  |
| C    | 6.466098  | 8.902505  | 4.435673  |
| H    | 7.512605  | 8.607696  | 4.574626  |
| C    | 6.148652  | 10.043265 | 3.681265  |
| H    | 6.945903  | 10.641411 | 3.226087  |
| C    | 4.803484  | 10.416056 | 3.516659  |
| H    | 4.547390  | 11.307107 | 2.932193  |
| C    | 3.780570  | 9.656372  | 4.104311  |
| H    | 2.735628  | 9.957175  | 3.974696  |
| C    | 2.439092  | 9.668834  | 7.434239  |
| H    | 3.502248  | 9.513542  | 7.651758  |
| C    | 1.784285  | 8.863349  | 6.475174  |
| C    | 0.432004  | 9.119970  | 6.176956  |
| H    | -0.074689 | 8.519295  | 5.417399  |
| C    | -0.258282 | 10.149959 | 6.838267  |
| H    | -1.310008 | 10.338395 | 6.595042  |
| C    | 0.393351  | 10.931012 | 7.804345  |
| H    | -0.147680 | 11.730679 | 8.322838  |
| C    | 1.746284  | 10.690133 | 8.099691  |
| H    | 2.265474  | 11.303095 | 8.845318  |
| S    | 1.124682  | 4.331992  | 2.900660  |
| C    | -0.508352 | 4.617987  | 2.044807  |
| H    | -1.135761 | 3.742899  | 2.294554  |
| H    | -0.301114 | 4.583450  | 0.959109  |
| C    | 4.111766  | 3.439674  | 4.892565  |
| C    | 5.444597  | 3.899502  | 4.931357  |
| H    | 5.679200  | 4.848050  | 5.427246  |
| C    | 6.475875  | 3.149667  | 4.343686  |
| H    | 7.507870  | 3.515893  | 4.389342  |
| C    | 6.186153  | 1.934761  | 3.701081  |
| H    | 6.990839  | 1.349699  | 3.241966  |

|   |           |          |           |
|---|-----------|----------|-----------|
| C | 4.859738  | 1.473270 | 3.651019  |
| H | 4.625132  | 0.526580 | 3.151233  |
| C | 3.828120  | 2.216701 | 4.245134  |
| H | 2.798486  | 1.846468 | 4.206426  |
| C | 2.479048  | 2.302560 | 7.505496  |
| H | 3.541169  | 2.472168 | 7.717044  |
| C | 1.814390  | 3.081585 | 6.531297  |
| C | 0.463353  | 2.806902 | 6.243322  |
| H | -0.051004 | 3.387074 | 5.473097  |
| C | -0.215943 | 1.785483 | 6.928851  |
| H | -1.266846 | 1.583099 | 6.693475  |
| C | 0.445583  | 1.030756 | 7.909061  |
| H | -0.086900 | 0.237861 | 8.446453  |
| C | 1.797282  | 1.289504 | 8.194648  |
| H | 2.324056  | 0.697290 | 8.951624  |
| C | 4.335079  | 4.800547 | 1.424453  |
| H | 4.577467  | 3.800508 | 1.785529  |
| C | 3.483787  | 5.117046 | 0.319430  |
| H | 2.969714  | 4.397517 | -0.321183 |
| C | 4.091551  | 8.504886 | 4.861780  |
| P | 2.722273  | 4.433240 | 5.626457  |
| C | 3.563882  | 6.657827 | 7.004618  |
| C | 3.572844  | 5.310547 | 7.015115  |
| H | 4.055494  | 4.742804 | 7.822466  |
| H | 4.038011  | 7.243892 | 7.803990  |

---

**Table S50.**  $[\text{CpNi}^{\text{I}}(\text{pdt})\text{Fe}^{\text{I}}(\text{dppv})(\text{CO})]^-$  with pdt Oriented Toward Ni  
 ( $[\mathbf{1b}]^-$ ,  $-3203.18570180 E_h$ )

| atom | x         | y         | z         |
|------|-----------|-----------|-----------|
| Ni   | 10.348631 | 8.717371  | 7.388539  |
| Fe   | 11.770476 | 6.794174  | 8.730061  |
| P    | 11.516365 | 6.762535  | 10.906509 |
| S    | 12.102583 | 9.104987  | 8.815906  |
| P    | 10.525621 | 4.973432  | 8.705358  |
| S    | 11.558995 | 7.021526  | 6.445919  |
| C    | 10.746024 | 1.063847  | 7.222329  |
| H    | 10.119194 | 0.163231  | 7.239935  |
| C    | 11.997592 | 1.040187  | 6.584011  |
| H    | 12.352987 | 0.120791  | 6.102216  |
| C    | 8.258473  | 9.159304  | 11.818442 |
| H    | 7.442831  | 9.618595  | 11.247227 |
| C    | 7.690092  | 5.146677  | 9.138076  |
| H    | 7.934156  | 5.231390  | 10.203785 |
| C    | 8.324726  | 9.322325  | 13.212147 |
| H    | 7.558647  | 9.906474  | 13.737082 |
| C    | 9.367828  | 10.739449 | 6.858104  |
| H    | 9.924632  | 11.679842 | 6.852123  |
| C    | 9.383043  | 8.739760  | 13.931686 |
| H    | 9.444405  | 8.866391  | 15.020091 |
| C    | 13.399650 | 6.156163  | 8.770963  |
| C    | 12.335953 | 3.378742  | 7.183056  |
| H    | 12.950326 | 4.283469  | 7.174369  |
| C    | 9.202690  | 9.849674  | 5.752580  |
| H    | 9.598145  | 9.994456  | 4.743913  |
| C    | 13.414189 | 9.212458  | 6.260796  |
| H    | 12.567999 | 9.837668  | 5.914784  |
| H    | 14.329141 | 9.570744  | 5.735956  |
| C    | 6.024442  | 5.140413  | 7.359251  |
| H    | 4.979391  | 5.209595  | 7.034384  |
| C    | 11.083160 | 3.413433  | 7.826331  |
| C    | 12.788729 | 2.201436  | 6.563819  |
| H    | 13.763475 | 2.195168  | 6.061092  |
| C    | 10.365407 | 7.994734  | 13.260569 |
| H    | 11.191572 | 7.549723  | 13.827406 |
| C    | 8.456636  | 8.711881  | 6.206088  |
| H    | 8.184114  | 7.840143  | 5.608600  |
| O    | 14.529273 | 5.777692  | 8.734721  |
| C    | 7.052511  | 4.972721  | 6.413350  |
| H    | 6.810187  | 4.909696  | 5.345208  |
| C    | 10.867085 | 5.104382  | 11.431831 |
| C    | 10.302550 | 7.823781  | 11.859473 |
| C    | 10.290846 | 2.242708  | 7.834383  |
| H    | 9.301918  | 2.260197  | 8.308178  |
| C    | 8.730957  | 10.152599 | 7.999178  |
| H    | 8.706238  | 10.582170 | 9.003175  |
| C    | 8.166715  | 8.893102  | 7.597967  |
| H    | 7.587280  | 8.208074  | 8.220348  |
| C    | 6.351240  | 5.230764  | 8.723250  |
| H    | 5.559518  | 5.366121  | 9.470938  |

|   |           |           |           |
|---|-----------|-----------|-----------|
| C | 13.161615 | 7.758971  | 5.839041  |
| H | 13.983958 | 7.106117  | 6.187213  |
| H | 13.123518 | 7.697402  | 4.734431  |
| C | 9.242350  | 8.416592  | 11.144243 |
| H | 9.216124  | 8.307205  | 10.051483 |
| C | 8.728971  | 4.960414  | 8.197978  |
| C | 8.389763  | 4.886252  | 6.825664  |
| H | 9.184497  | 4.763854  | 6.080792  |
| C | 13.039835 | 6.948344  | 11.946916 |
| C | 13.555698 | 8.238420  | 12.210947 |
| H | 13.012892 | 9.118584  | 11.849217 |
| C | 13.768027 | 5.822468  | 12.385805 |
| H | 13.394800 | 4.815755  | 12.163150 |
| C | 15.472524 | 7.263613  | 13.358242 |
| H | 16.414565 | 7.386098  | 13.906630 |
| C | 14.972766 | 5.978132  | 13.090638 |
| H | 15.525243 | 5.091269  | 13.424657 |
| C | 14.762594 | 8.391032  | 12.911003 |
| H | 15.151407 | 9.398090  | 13.106058 |
| C | 13.609068 | 9.430363  | 7.767068  |
| H | 13.888628 | 10.485566 | 7.951393  |
| H | 14.426650 | 8.790934  | 8.149515  |
| C | 10.378857 | 4.326241  | 10.443987 |
| H | 9.907826  | 3.351380  | 10.640621 |
| H | 10.824907 | 4.817344  | 12.492897 |

---

**Table S51.**  $[\text{CpNi}^{\text{I}}(\text{pdt})\text{Fe}^{\text{I}}(\text{dppv})(\text{CO})]^{-}$  with pdt Oriented Toward Fe  
 ( $[\mathbf{1b}]^{-}$ ,  $-3203.18219354 E_{\text{h}}$ )

| atom | x         | y         | z         |
|------|-----------|-----------|-----------|
| Ni   | 10.391213 | 8.644329  | 7.389750  |
| Fe   | 11.834520 | 6.769388  | 8.731128  |
| P    | 11.557108 | 6.747895  | 10.904389 |
| S    | 12.093182 | 9.110641  | 8.847847  |
| P    | 10.520476 | 4.981581  | 8.689324  |
| S    | 11.688552 | 7.020654  | 6.452105  |
| C    | 10.707613 | 1.071050  | 7.208296  |
| H    | 10.101266 | 0.158842  | 7.275651  |
| C    | 11.904743 | 1.070151  | 6.472551  |
| H    | 12.238150 | 0.156829  | 5.964193  |
| C    | 8.259021  | 9.112726  | 11.754906 |
| H    | 7.440555  | 9.552243  | 11.172412 |
| C    | 7.700398  | 5.188208  | 9.206051  |
| H    | 7.977826  | 5.291222  | 10.261900 |
| C    | 8.313260  | 9.294597  | 13.146719 |
| H    | 7.534836  | 9.873780  | 13.658845 |
| C    | 9.425895  | 10.644547 | 6.815686  |
| H    | 9.983662  | 11.584407 | 6.818871  |
| C    | 9.374764  | 8.737000  | 13.880907 |
| H    | 9.427037  | 8.878474  | 14.967907 |
| C    | 13.392483 | 5.985939  | 8.861007  |
| C    | 12.244766 | 3.416355  | 7.040978  |
| H    | 12.831480 | 4.336869  | 6.973311  |
| C    | 9.316409  | 9.731307  | 5.721157  |
| H    | 9.758688  | 9.857000  | 4.729462  |
| C    | 14.118709 | 8.550460  | 6.869921  |
| H    | 14.994748 | 8.986669  | 6.338427  |
| H    | 14.511306 | 7.761978  | 7.535384  |
| C    | 5.979388  | 5.165525  | 7.480133  |
| H    | 4.925636  | 5.241232  | 7.186425  |
| C    | 11.047507 | 3.427775  | 7.783581  |
| C    | 12.668919 | 2.246507  | 6.388119  |
| H    | 13.599779 | 2.257965  | 5.808263  |
| C    | 10.372821 | 7.998538  | 13.225899 |
| H    | 11.201937 | 7.573587  | 13.803546 |
| C    | 8.535972  | 8.608005  | 6.157203  |
| H    | 8.288155  | 7.726824  | 5.562866  |
| O    | 14.457579 | 5.454338  | 8.919237  |
| C    | 6.975998  | 4.965799  | 6.506428  |
| H    | 6.699710  | 4.882821  | 5.447893  |
| C    | 10.908161 | 5.088254  | 11.418184 |
| C    | 10.321843 | 7.809080  | 11.826822 |
| C    | 10.280714 | 2.241915  | 7.855006  |
| H    | 9.332022  | 2.241068  | 8.405279  |
| C    | 8.722270  | 10.084797 | 7.930628  |
| H    | 8.653929  | 10.530810 | 8.925486  |
| C    | 8.173823  | 8.821044  | 7.526263  |
| H    | 7.565229  | 8.148550  | 8.134333  |
| C    | 6.350462  | 5.280135  | 8.831106  |
| H    | 5.584296  | 5.440299  | 9.600300  |



|   |           |           |           |
|---|-----------|-----------|-----------|
| C | 13.202735 | 7.917301  | 5.816181  |
| H | 13.782062 | 7.183728  | 5.222653  |
| H | 12.826676 | 8.692010  | 5.120193  |
| C | 9.257679  | 8.375811  | 11.096318 |
| H | 9.237338  | 8.252434  | 10.004703 |
| C | 8.707979  | 4.968566  | 8.238383  |
| C | 8.323949  | 4.872450  | 6.878996  |
| H | 9.092750  | 4.722282  | 6.112073  |
| C | 13.064821 | 6.951019  | 11.961435 |
| C | 13.576129 | 8.247345  | 12.206240 |
| H | 13.038531 | 9.118979  | 11.816881 |
| C | 13.785404 | 5.834848  | 12.436072 |
| H | 13.416813 | 4.823372  | 12.228893 |
| C | 15.473417 | 7.297345  | 13.405957 |
| H | 16.405774 | 7.431783  | 13.967936 |
| C | 14.978354 | 6.006024  | 13.157088 |
| H | 15.525407 | 5.126577  | 13.518351 |
| C | 14.770953 | 8.414791  | 12.923229 |
| H | 15.156038 | 9.425920  | 13.104292 |
| C | 13.480768 | 9.653052  | 7.720769  |
| H | 13.074271 | 10.453435 | 7.072806  |
| H | 14.255096 | 10.103861 | 8.370875  |
| C | 10.408143 | 4.321950  | 10.427211 |
| H | 9.932400  | 3.349177  | 10.622939 |
| H | 10.869566 | 4.792036  | 12.476763 |

---

**Table S52.**  $[\text{CpNi}^{\text{III}}(\text{pdt})\text{Fe}^{\text{II}}(\text{dppv})(\text{CO})]^{2+}$  with pdt Oriented Toward Ni  
 $([\mathbf{1b}]^{2+}, -3202.66201673 E_{\text{h}})$

| atom | x         | y         | z         |
|------|-----------|-----------|-----------|
| Ni   | 10.394333 | 8.728738  | 7.402955  |
| Fe   | 11.567755 | 6.899220  | 8.721660  |
| P    | 11.385208 | 6.766558  | 11.065829 |
| S    | 12.031005 | 9.107471  | 8.815095  |
| P    | 10.453148 | 4.850540  | 8.734269  |
| S    | 11.443282 | 7.040630  | 6.467737  |
| C    | 10.836123 | 1.096459  | 7.100193  |
| H    | 10.222230 | 0.191504  | 7.047806  |
| C    | 12.119574 | 1.115320  | 6.526312  |
| H    | 12.507493 | 0.222041  | 6.026281  |
| C    | 7.962748  | 8.874597  | 11.961357 |
| H    | 6.974997  | 9.015861  | 11.509295 |
| C    | 7.663419  | 5.218091  | 9.118919  |
| H    | 7.881930  | 5.279386  | 10.190719 |
| C    | 8.257012  | 9.462069  | 13.205051 |
| H    | 7.502108  | 10.068260 | 13.716148 |
| C    | 9.526398  | 10.653950 | 7.165594  |
| H    | 10.052525 | 11.596265 | 7.328698  |
| C    | 9.515367  | 9.263041  | 13.795897 |
| H    | 9.743192  | 9.709644  | 14.769128 |
| C    | 13.223118 | 6.332093  | 8.799943  |
| C    | 12.408045 | 3.425188  | 7.233573  |
| H    | 13.029654 | 4.322559  | 7.280248  |
| C    | 9.417654  | 9.947949  | 5.939607  |
| H    | 9.834062  | 10.242889 | 4.975386  |
| C    | 13.409743 | 9.136883  | 6.286817  |
| H    | 12.650019 | 9.822038  | 5.868552  |
| H    | 14.373548 | 9.406401  | 5.808811  |
| C    | 6.037180  | 5.214355  | 7.304823  |
| H    | 4.999213  | 5.283797  | 6.963293  |
| C    | 11.121246 | 3.411953  | 7.811503  |
| C    | 12.902455 | 2.278718  | 6.591530  |
| H    | 13.901173 | 2.296409  | 6.143535  |
| C    | 10.487797 | 8.482092  | 13.150973 |
| H    | 11.458194 | 8.322198  | 13.629595 |
| C    | 8.665771  | 8.735092  | 6.208168  |
| H    | 8.429745  | 7.962155  | 5.474952  |
| O    | 14.351212 | 6.029856  | 8.815146  |
| C    | 7.070353  | 4.995724  | 6.374610  |
| H    | 6.836463  | 4.886527  | 5.310248  |
| C    | 10.765908 | 5.088324  | 11.469713 |
| C    | 10.198869 | 7.898442  | 11.896793 |
| C    | 10.332097 | 2.237755  | 7.738822  |
| H    | 9.324247  | 2.214109  | 8.167884  |
| C    | 8.819803  | 9.893169  | 8.193120  |
| H    | 8.738198  | 10.180180 | 9.242861  |
| C    | 8.250975  | 8.737044  | 7.584227  |
| H    | 7.650976  | 7.964526  | 8.066640  |
| C    | 6.334601  | 5.320877  | 8.675066  |
| H    | 5.528966  | 5.462644  | 9.403127  |

|   |           |           |           |
|---|-----------|-----------|-----------|
| C | 13.092349 | 7.698468  | 5.867624  |
| H | 13.863692 | 6.986780  | 6.207539  |
| H | 13.024593 | 7.629521  | 4.768408  |
| C | 8.929568  | 8.098570  | 11.305727 |
| H | 8.697348  | 7.634503  | 10.340353 |
| C | 8.703573  | 4.994817  | 8.186793  |
| C | 8.400275  | 4.885753  | 6.808387  |
| H | 9.194374  | 4.679768  | 6.082277  |
| C | 12.993376 | 6.923223  | 11.920691 |
| C | 13.593981 | 8.196866  | 12.068510 |
| H | 13.073292 | 9.100081  | 11.730549 |
| C | 13.676666 | 5.769614  | 12.367956 |
| H | 13.233248 | 4.774951  | 12.248838 |
| C | 15.524631 | 7.159219  | 13.129031 |
| H | 16.506340 | 7.251760  | 13.604530 |
| C | 14.936887 | 5.893436  | 12.973715 |
| H | 15.456801 | 4.997205  | 13.326931 |
| C | 14.852821 | 8.308907  | 12.676261 |
| H | 15.307639 | 9.296825  | 12.802695 |
| C | 13.569884 | 9.398262  | 7.787302  |
| H | 13.813536 | 10.460098 | 7.962752  |
| H | 14.369819 | 8.785354  | 8.236515  |
| C | 10.344606 | 4.282392  | 10.476125 |
| H | 9.936636  | 3.281070  | 10.671105 |
| H | 10.703764 | 4.795786  | 12.527015 |

---

**Table S53.** [CpNi<sup>III</sup>(pdt)Fe<sup>II</sup>(dppv)(CO)]<sup>2+</sup> with pdt Oriented Toward Fe  
 ([1b]<sup>2+</sup>, -3202.65799897 E<sub>h</sub>)

| atom | x         | y         | z         |
|------|-----------|-----------|-----------|
| Ni   | 10.420149 | 8.709988  | 7.443894  |
| Fe   | 11.629452 | 6.871471  | 8.721284  |
| P    | 11.403817 | 6.769485  | 11.066426 |
| S    | 12.100271 | 9.082098  | 8.794709  |
| P    | 10.460635 | 4.853788  | 8.722574  |
| S    | 11.453873 | 7.046002  | 6.469413  |
| C    | 10.855794 | 1.075622  | 7.153117  |
| H    | 10.271140 | 0.150198  | 7.169975  |
| C    | 12.086124 | 1.123628  | 6.473985  |
| H    | 12.462573 | 0.232107  | 5.962212  |
| C    | 7.946036  | 8.832152  | 11.933095 |
| H    | 6.952524  | 8.941935  | 11.484999 |
| C    | 7.669185  | 5.207198  | 9.118251  |
| H    | 7.889136  | 5.265413  | 10.189883 |
| C    | 8.236831  | 9.456022  | 13.159867 |
| H    | 7.472972  | 10.058486 | 13.662004 |
| C    | 9.575939  | 10.645626 | 7.241044  |
| H    | 10.116501 | 11.576875 | 7.420054  |
| C    | 9.503541  | 9.298139  | 13.745308 |
| H    | 9.729151  | 9.772962  | 14.705603 |
| C    | 13.236270 | 6.172563  | 8.876796  |
| C    | 12.350853 | 3.458261  | 7.105982  |
| H    | 12.939493 | 4.378608  | 7.077812  |
| C    | 9.461465  | 9.959632  | 6.003368  |
| H    | 9.887608  | 10.262592 | 5.045862  |
| C    | 14.035095 | 8.379146  | 6.730973  |
| H    | 14.840543 | 8.827457  | 6.113884  |
| H    | 14.516592 | 7.574626  | 7.308515  |
| C    | 6.039265  | 5.197389  | 7.307575  |
| H    | 5.000108  | 5.260741  | 6.968525  |
| C    | 11.119649 | 3.414554  | 7.792890  |
| C    | 12.829383 | 2.314014  | 6.447786  |
| H    | 13.785178 | 2.354503  | 5.915544  |
| C    | 10.487243 | 8.521611  | 13.112377 |
| H    | 11.463365 | 8.392359  | 13.588245 |
| C    | 8.685196  | 8.758201  | 6.251107  |
| H    | 8.438647  | 8.000071  | 5.505941  |
| O    | 14.302033 | 5.714792  | 9.006435  |
| C    | 7.071870  | 4.989716  | 6.374339  |
| H    | 6.836579  | 4.883008  | 5.310081  |
| C    | 10.780580 | 5.090797  | 11.460552 |
| C    | 10.201230 | 7.901119  | 11.875116 |
| C    | 10.367454 | 2.214168  | 7.808131  |
| H    | 9.397807  | 2.167860  | 8.316504  |
| C    | 8.847577  | 9.885267  | 8.252725  |
| H    | 8.765354  | 10.159046 | 9.305749  |
| C    | 8.262802  | 8.749552  | 7.624618  |
| H    | 7.648772  | 7.979768  | 8.093236  |
| C    | 6.338694  | 5.300550  | 8.677633  |
| H    | 5.533484  | 5.432777  | 9.407948  |

|   |           |           |           |
|---|-----------|-----------|-----------|
| C | 13.018249 | 7.785557  | 5.753698  |
| H | 13.479331 | 6.962097  | 5.180461  |
| H | 12.654091 | 8.534002  | 5.027917  |
| C | 8.924147  | 8.061133  | 11.288566 |
| H | 8.695709  | 7.572087  | 10.335044 |
| C | 8.708696  | 4.996056  | 8.182725  |
| C | 8.403323  | 4.887724  | 6.804895  |
| H | 9.197247  | 4.690046  | 6.076302  |
| C | 12.994599 | 6.935288  | 11.950944 |
| C | 13.603207 | 8.208208  | 12.071009 |
| H | 13.100275 | 9.103530  | 11.688012 |
| C | 13.655491 | 5.792052  | 12.454507 |
| H | 13.208022 | 4.797178  | 12.355906 |
| C | 15.495627 | 7.191364  | 13.216713 |
| H | 16.465628 | 7.291749  | 13.714148 |
| C | 14.900567 | 5.926039  | 13.088659 |
| H | 15.403299 | 5.037835  | 13.484398 |
| C | 14.846519 | 8.330609  | 12.707686 |
| H | 15.307140 | 9.318379  | 12.812433 |
| C | 13.548975 | 9.479019  | 7.677042  |
| H | 13.231844 | 10.385988 | 7.132616  |
| H | 14.360273 | 9.768050  | 8.367817  |
| C | 10.359541 | 4.286683  | 10.465142 |
| H | 9.949850  | 3.286499  | 10.662054 |
| H | 10.714383 | 4.794987  | 12.516682 |

---

**Table S54.** [CpNi<sup>II</sup>(Me<sub>2</sub>pdt)Fe<sup>II</sup>(dppe)(CO)]<sup>+</sup> with pdt Oriented Toward Ni ([1c]<sup>+</sup>, -3282.83197161 E<sub>h</sub>)

| atom | x         | y         | z         |
|------|-----------|-----------|-----------|
| Ni   | 10.523474 | 8.725938  | 7.620294  |
| Fe   | 11.750575 | 6.768791  | 8.716330  |
| P    | 11.355233 | 6.700785  | 10.952905 |
| S    | 12.327991 | 8.960389  | 8.850132  |
| P    | 10.629513 | 4.808392  | 8.585478  |
| S    | 11.570415 | 7.162965  | 6.491550  |
| C    | 10.906086 | 1.204438  | 6.574648  |
| H    | 10.329908 | 0.273682  | 6.537586  |
| C    | 12.076247 | 1.342633  | 5.808217  |
| H    | 12.415496 | 0.517959  | 5.172384  |
| C    | 7.868792  | 8.683179  | 12.091242 |
| H    | 6.789617  | 8.502310  | 12.039814 |
| C    | 7.825557  | 4.623919  | 9.207718  |
| H    | 8.107416  | 4.395094  | 10.240764 |
| C    | 8.359310  | 9.868102  | 12.665866 |
| H    | 7.664108  | 10.613576 | 13.066221 |
| C    | 9.495333  | 10.622145 | 7.620127  |
| H    | 9.986877  | 11.590035 | 7.731365  |
| C    | 9.745270  | 10.088947 | 12.727543 |
| H    | 10.136787 | 11.008123 | 13.176605 |
| C    | 13.284523 | 5.987962  | 8.802656  |
| C    | 12.371958 | 3.598846  | 6.671213  |
| H    | 12.947796 | 4.526878  | 6.700450  |
| C    | 9.206475  | 9.957222  | 6.404308  |
| H    | 9.422477  | 10.313211 | 5.396186  |
| C    | 13.731577 | 9.179580  | 6.248309  |
| C    | 6.067672  | 4.907713  | 7.545960  |
| H    | 5.005041  | 4.926444  | 7.282196  |
| C    | 11.202196 | 3.467657  | 7.446458  |
| C    | 12.805531 | 2.540057  | 5.856109  |
| H    | 13.715835 | 2.654890  | 5.257971  |
| C    | 10.639094 | 9.126207  | 12.230655 |
| H    | 11.717064 | 9.301136  | 12.304049 |
| C    | 8.614013  | 8.677098  | 6.740599  |
| H    | 8.305879  | 7.914367  | 6.024701  |
| O    | 14.365934 | 5.517229  | 8.791662  |
| C    | 10.803298 | 4.006416  | 10.271362 |
| H    | 10.122617 | 3.142063  | 10.372754 |
| H    | 11.834439 | 3.608720  | 10.278676 |
| C    | 7.045181  | 5.113352  | 6.555913  |
| H    | 6.745175  | 5.281894  | 5.515645  |
| C    | 10.611090 | 5.022236  | 11.408455 |
| H    | 11.084506 | 4.662958  | 12.337871 |
| H    | 9.542681  | 5.178458  | 11.630749 |
| C    | 10.155305 | 7.927853  | 11.658221 |
| C    | 10.467556 | 2.260251  | 7.385657  |
| H    | 9.543196  | 2.147328  | 7.963478  |
| C    | 9.061614  | 9.768016  | 8.717276  |
| H    | 9.163393  | 10.001328 | 9.777932  |
| C    | 8.467140  | 8.592556  | 8.165619  |

|   |           |           |           |
|---|-----------|-----------|-----------|
| H | 8.033905  | 7.759432  | 8.716797  |
| C | 6.460755  | 4.660121  | 8.869964  |
| H | 5.706794  | 4.477096  | 9.643324  |
| C | 13.186558 | 7.801940  | 5.806351  |
| H | 13.917773 | 7.010431  | 6.051703  |
| H | 13.043294 | 7.799989  | 4.710759  |
| C | 8.758964  | 7.724377  | 11.582044 |
| H | 8.350518  | 6.818765  | 11.119370 |
| C | 8.813854  | 4.841600  | 8.223587  |
| C | 8.406936  | 5.084342  | 6.890379  |
| H | 9.162020  | 5.226354  | 6.108291  |
| C | 12.790431 | 6.870609  | 12.112607 |
| C | 14.054237 | 7.309515  | 11.670466 |
| H | 14.208825 | 7.555028  | 10.617191 |
| C | 12.608615 | 6.579838  | 13.485616 |
| H | 11.625973 | 6.272937  | 13.862115 |
| C | 14.936359 | 7.128750  | 13.931410 |
| H | 15.769741 | 7.223359  | 14.635586 |
| C | 13.675664 | 6.703924  | 14.385875 |
| H | 13.520893 | 6.472719  | 15.445202 |
| C | 15.121661 | 7.436043  | 12.575655 |
| H | 16.099641 | 7.772835  | 12.215604 |
| C | 13.829312 | 9.287915  | 7.786947  |
| H | 14.143949 | 10.311166 | 8.060629  |
| H | 14.594122 | 8.586745  | 8.167140  |
| C | 12.902417 | 10.335518 | 5.654225  |
| H | 13.345303 | 11.309847 | 5.929108  |
| H | 12.883664 | 10.271960 | 4.551188  |
| H | 11.862133 | 10.315890 | 6.018030  |
| C | 15.180756 | 9.283058  | 5.698521  |
| H | 15.827848 | 8.478212  | 6.091837  |
| H | 15.183323 | 9.216699  | 4.595625  |
| H | 15.632897 | 10.252555 | 5.974957  |

---

**Table S55.** [CpNi<sup>II</sup>(Me<sub>2</sub>pdt)Fe<sup>II</sup>(dppe)(CO)]<sup>+</sup> with pdt Oriented Toward Fe ([1c]<sup>+</sup>, -3282.82962339 E<sub>h</sub>)

| atom | x         | y         | z         |
|------|-----------|-----------|-----------|
| Ni   | 6.844859  | 9.044809  | 8.267013  |
| Fe   | 6.321722  | 11.456350 | 7.672758  |
| S    | 8.346696  | 10.646651 | 8.281713  |
| P    | 6.226015  | 12.635279 | 9.610918  |
| S    | 6.261839  | 9.699156  | 6.253436  |
| P    | 4.080400  | 11.728083 | 7.536047  |
| O    | 6.620804  | 13.915320 | 6.148280  |
| C    | 6.469545  | 11.740172 | 11.217083 |
| C    | 7.744122  | 11.736203 | 11.827131 |
| H    | 8.570238  | 12.291957 | 11.372756 |
| C    | 2.950016  | 10.450150 | 8.252728  |
| C    | 5.629412  | 10.336372 | 13.035185 |
| H    | 4.799846  | 9.796829  | 13.504981 |
| C    | 5.628966  | 7.347104  | 8.526170  |
| H    | 4.794862  | 7.101821  | 7.867980  |
| C    | 6.510384  | 12.916886 | 6.765422  |
| C    | 9.097818  | 10.109081 | 5.452363  |
| C    | 7.955030  | 11.039719 | 13.028424 |
| H    | 8.946634  | 11.053725 | 13.493484 |
| C    | 6.868829  | 8.262349  | 10.233862 |
| H    | 7.170987  | 8.837278  | 11.109839 |
| C    | 7.763982  | 7.474503  | 9.394166  |
| H    | 8.840768  | 7.375257  | 9.542020  |
| C    | 9.529801  | 10.113992 | 6.936125  |
| H    | 10.400272 | 10.784846 | 7.061147  |
| H    | 9.848165  | 9.102345  | 7.246378  |
| C    | 10.203074 | 9.342527  | 4.672274  |
| H    | 10.317203 | 8.304673  | 5.034545  |
| H    | 11.178180 | 9.851288  | 4.778241  |
| H    | 9.963358  | 9.304404  | 3.594325  |
| C    | 4.505858  | 13.406574 | 9.779593  |
| H    | 3.984673  | 12.883260 | 10.598035 |
| H    | 4.621907  | 14.458121 | 10.092383 |
| C    | 5.545269  | 8.134454  | 9.722483  |
| H    | 4.643683  | 8.598752  | 10.119891 |
| C    | 1.895990  | 8.256208  | 8.018842  |
| H    | 1.737030  | 7.341446  | 7.437087  |
| C    | 7.781849  | 9.330074  | 5.229256  |
| H    | 7.946211  | 8.247707  | 5.378470  |
| H    | 7.444975  | 9.470927  | 4.185283  |
| C    | 5.418642  | 11.018972 | 11.826796 |
| H    | 4.427718  | 10.974598 | 11.361387 |
| C    | 9.017047  | 11.537862 | 4.879684  |
| H    | 9.989388  | 12.052000 | 4.986570  |
| H    | 8.254999  | 12.147895 | 5.382725  |
| H    | 8.772498  | 11.509097 | 3.802424  |
| C    | 2.752433  | 9.252108  | 7.527179  |
| H    | 3.254576  | 9.110178  | 6.563237  |
| C    | 3.716341  | 13.316252 | 8.463049  |
| H    | 4.031842  | 14.114908 | 7.767826  |



|   |           |           |           |
|---|-----------|-----------|-----------|
| H | 2.630927  | 13.440215 | 8.626537  |
| C | 2.264852  | 10.628304 | 9.473782  |
| H | 2.365725  | 11.560244 | 10.039703 |
| C | 6.998894  | 6.897789  | 8.352061  |
| H | 7.365649  | 6.261235  | 7.545640  |
| C | 1.227804  | 8.436841  | 9.243072  |
| H | 0.555833  | 7.660088  | 9.622877  |
| C | 1.411126  | 9.625222  | 9.966552  |
| H | 0.877018  | 9.784089  | 10.909683 |
| C | 6.898140  | 10.345271 | 13.639862 |
| H | 7.060481  | 9.815357  | 14.584422 |
| C | 9.339799  | 15.354314 | 9.109815  |
| H | 10.185800 | 15.490155 | 8.427643  |
| C | 9.115868  | 16.271599 | 10.146996 |
| H | 9.786013  | 17.127849 | 10.277763 |
| C | 8.031191  | 16.087090 | 11.022002 |
| H | 7.856320  | 16.794131 | 11.839970 |
| C | 7.170932  | 14.993274 | 10.854376 |
| H | 6.345277  | 14.850187 | 11.561069 |
| C | 8.477214  | 14.258676 | 8.936682  |
| H | 8.661046  | 13.547639 | 8.126826  |
| C | 3.436952  | 12.394281 | 3.478857  |
| H | 4.040165  | 12.456520 | 2.566790  |
| C | 4.060541  | 12.114260 | 4.705989  |
| H | 5.141919  | 11.958421 | 4.740172  |
| C | 3.297039  | 12.030172 | 5.888096  |
| C | 1.897187  | 12.222182 | 5.820743  |
| H | 1.284278  | 12.138119 | 6.725369  |
| C | 1.280097  | 12.506477 | 4.594709  |
| H | 0.195790  | 12.655907 | 4.555061  |
| C | 2.049345  | 12.593085 | 3.421478  |
| H | 1.565112  | 12.812003 | 2.463844  |
| C | 7.379180  | 14.072405 | 9.800438  |

---

**Table S56.** [CpNi<sup>I</sup>(Me<sub>2</sub>pdt)Fe<sup>II</sup>(dppe)(CO)]<sup>0</sup> with pdt Oriented Toward Ni ([1c]<sup>0</sup>, -3282.99649843 E<sub>h</sub>)

| atom | x         | y         | z         |
|------|-----------|-----------|-----------|
| Ni   | 10.492675 | 8.685293  | 7.653980  |
| Fe   | 11.788570 | 6.791168  | 8.683987  |
| P    | 11.358316 | 6.750333  | 10.892459 |
| S    | 12.423256 | 8.980204  | 8.862982  |
| P    | 10.646353 | 4.867315  | 8.561122  |
| S    | 11.626980 | 7.126822  | 6.434762  |
| C    | 10.903035 | 1.197889  | 6.624500  |
| H    | 10.321885 | 0.268774  | 6.603930  |
| C    | 12.077956 | 1.313981  | 5.862032  |
| H    | 12.417557 | 0.474230  | 5.245052  |
| C    | 7.880858  | 8.697425  | 12.135012 |
| H    | 6.801264  | 8.516576  | 12.082949 |
| C    | 7.842269  | 4.531467  | 9.172597  |
| H    | 8.134049  | 4.262311  | 10.193510 |
| C    | 8.372530  | 9.870368  | 12.731892 |
| H    | 7.679066  | 10.606107 | 13.154206 |
| C    | 9.420780  | 10.624979 | 7.669736  |
| H    | 9.936485  | 11.580322 | 7.785595  |
| C    | 9.757744  | 10.096877 | 12.774494 |
| H    | 10.152217 | 11.012906 | 13.228769 |
| C    | 13.330500 | 6.011341  | 8.763733  |
| C    | 12.375471 | 3.589047  | 6.678159  |
| H    | 12.943317 | 4.522021  | 6.687796  |
| C    | 9.150102  | 9.958182  | 6.425494  |
| H    | 9.402525  | 10.328880 | 5.429916  |
| C    | 13.777076 | 9.153745  | 6.242651  |
| C    | 6.071961  | 4.853728  | 7.531849  |
| H    | 5.008126  | 4.857686  | 7.269872  |
| C    | 11.202543 | 3.480252  | 7.450754  |
| C    | 12.809957 | 2.510537  | 5.889131  |
| H    | 13.723153 | 2.611438  | 5.291800  |
| C    | 10.647890 | 9.149525  | 12.243362 |
| H    | 11.725680 | 9.333751  | 12.291207 |
| C    | 8.484278  | 8.725975  | 6.718267  |
| H    | 8.165056  | 7.980395  | 5.989821  |
| O    | 14.421359 | 5.546724  | 8.738702  |
| C    | 10.814020 | 4.051789  | 10.246780 |
| H    | 10.143490 | 3.178872  | 10.348850 |
| H    | 11.851178 | 3.670426  | 10.260622 |
| C    | 7.041438  | 5.156192  | 6.559045  |
| H    | 6.734647  | 5.392409  | 5.533706  |
| C    | 10.604124 | 5.074506  | 11.373174 |
| H    | 11.058064 | 4.725101  | 12.316402 |
| H    | 9.530385  | 5.232643  | 11.568523 |
| C    | 10.164935 | 7.959857  | 11.653949 |
| C    | 10.465863 | 2.274580  | 7.409536  |
| H    | 9.536927  | 2.180944  | 7.984052  |
| C    | 8.946604  | 9.795585  | 8.731062  |
| H    | 9.020242  | 10.010832 | 9.796996  |
| C    | 8.384709  | 8.606512  | 8.142727  |

|   |           |           |           |
|---|-----------|-----------|-----------|
| H | 7.927523  | 7.776253  | 8.681564  |
| C | 6.475913  | 4.542121  | 8.838469  |
| H | 5.729500  | 4.295099  | 9.602304  |
| C | 13.258108 | 7.766873  | 5.794541  |
| H | 14.004769 | 6.993207  | 6.052892  |
| H | 13.149852 | 7.764647  | 4.693306  |
| C | 8.768632  | 7.756613  | 11.590638 |
| H | 8.358497  | 6.868996  | 11.095698 |
| C | 8.822597  | 4.841290  | 8.206100  |
| C | 8.403095  | 5.155807  | 6.892544  |
| H | 9.152474  | 5.397234  | 6.129561  |
| C | 12.777596 | 6.894353  | 12.094233 |
| C | 14.059989 | 7.286912  | 11.664944 |
| H | 14.223145 | 7.527613  | 10.612049 |
| C | 12.575303 | 6.618724  | 13.466607 |
| H | 11.577231 | 6.349385  | 13.831960 |
| C | 14.915222 | 7.087833  | 13.936476 |
| H | 15.744874 | 7.158290  | 14.649044 |
| C | 13.635996 | 6.709313  | 14.379331 |
| H | 13.461837 | 6.489309  | 15.438864 |
| C | 15.122314 | 7.381190  | 12.580605 |
| H | 16.114266 | 7.684765  | 12.227512 |
| C | 13.917435 | 9.248219  | 7.780378  |
| H | 14.280004 | 10.260268 | 8.043008  |
| H | 14.679396 | 8.525412  | 8.126266  |
| C | 12.898624 | 10.291898 | 5.688668  |
| H | 13.317787 | 11.276668 | 5.968746  |
| H | 12.849737 | 10.242834 | 4.584521  |
| H | 11.871046 | 10.227734 | 6.084119  |
| C | 15.205182 | 9.305815  | 5.652969  |
| H | 15.883970 | 8.513660  | 6.020374  |
| H | 15.181246 | 9.249592  | 4.548565  |
| H | 15.640768 | 10.284151 | 5.929620  |

---

**Table S57.**  $[\text{CpNi}^{\text{I}}(\text{Me}_2\text{pdt})\text{Fe}^{\text{II}}(\text{dppe})(\text{CO})]^0$  with pdt Oriented Toward Fe  
 ( $[\mathbf{1c}]^0$ ,  $-3282.99012011 E_h$ )

| atom | x         | y         | z         |
|------|-----------|-----------|-----------|
| Ni   | 10.524619 | 8.566196  | 7.752792  |
| Fe   | 11.888558 | 6.712790  | 8.729138  |
| P    | 11.398985 | 6.724246  | 10.922183 |
| S    | 12.473113 | 8.911941  | 8.902673  |
| P    | 10.670780 | 4.837853  | 8.597629  |
| S    | 11.667339 | 7.044977  | 6.486381  |
| C    | 10.856213 | 1.180102  | 6.633648  |
| H    | 10.259219 | 0.261280  | 6.606771  |
| C    | 12.031722 | 1.282252  | 5.870088  |
| H    | 12.355703 | 0.441530  | 5.246049  |
| C    | 7.880196  | 8.645279  | 12.071601 |
| H    | 6.803791  | 8.458105  | 11.986613 |
| C    | 7.867204  | 4.540167  | 9.214393  |
| H    | 8.159418  | 4.245793  | 10.228180 |
| C    | 8.346832  | 9.811994  | 12.700487 |
| H    | 7.636559  | 10.535503 | 13.115993 |
| C    | 9.599257  | 10.570383 | 7.716803  |
| H    | 10.181249 | 11.478717 | 7.886225  |
| C    | 9.728269  | 10.048851 | 12.783081 |
| H    | 10.103127 | 10.960924 | 13.261224 |
| C    | 13.313012 | 5.757423  | 8.985187  |
| C    | 12.371135 | 3.545569  | 6.702904  |
| H    | 12.950972 | 4.471870  | 6.716787  |
| C    | 9.389813  | 9.927009  | 6.450075  |
| H    | 9.756823  | 10.276188 | 5.482431  |
| C    | 14.103816 | 8.759215  | 6.408640  |
| C    | 6.095229  | 4.919113  | 7.587962  |
| H    | 5.030556  | 4.941212  | 7.330208  |
| C    | 11.197605 | 3.449387  | 7.476845  |
| C    | 12.784537 | 2.465771  | 5.904637  |
| H    | 13.697868 | 2.555177  | 5.305680  |
| C    | 10.639968 | 9.115846  | 12.262745 |
| H    | 11.714558 | 9.306673  | 12.343540 |
| C    | 8.587397  | 8.760095  | 6.677436  |
| H    | 8.271614  | 8.044031  | 5.918104  |
| O    | 14.275397 | 5.087485  | 9.162832  |
| C    | 10.827209 | 4.021077  | 10.282127 |
| H    | 10.138066 | 3.163581  | 10.388035 |
| H    | 11.855285 | 3.616643  | 10.291397 |
| C    | 7.064492  | 5.231636  | 6.618160  |
| H    | 6.756551  | 5.495324  | 5.599980  |
| C    | 10.644232 | 5.049446  | 11.409170 |
| H    | 11.115008 | 4.699843  | 12.343960 |
| H    | 9.575634  | 5.215385  | 11.625169 |
| C    | 10.181340 | 7.932503  | 11.643631 |
| C    | 10.439057 | 2.257926  | 7.428042  |
| H    | 9.509841  | 2.176171  | 8.003967  |
| C    | 8.954664  | 9.789132  | 8.725651  |
| H    | 8.951001  | 10.001577 | 9.794608  |
| C    | 8.342472  | 8.658560  | 8.083261  |

|   |           |           |           |
|---|-----------|-----------|-----------|
| H | 7.769740  | 7.870868  | 8.574237  |
| C | 6.499797  | 4.574415  | 8.886067  |
| H | 5.753354  | 4.319733  | 9.647301  |
| C | 12.941456 | 8.107567  | 5.625007  |
| H | 13.367124 | 7.465050  | 4.830933  |
| H | 12.346952 | 8.896735  | 5.129389  |
| C | 8.789223  | 7.720342  | 11.535748 |
| H | 8.400698  | 6.840152  | 11.011240 |
| C | 8.846666  | 4.860186  | 8.250616  |
| C | 8.427218  | 5.208599  | 6.946101  |
| H | 9.176751  | 5.461675  | 6.187317  |
| C | 12.801593 | 6.896825  | 12.137971 |
| C | 14.081635 | 7.304691  | 11.714545 |
| H | 14.247357 | 7.541216  | 10.660096 |
| C | 12.591286 | 6.626953  | 13.510058 |
| H | 11.594607 | 6.343879  | 13.868844 |
| C | 14.919996 | 7.134332  | 13.994951 |
| H | 15.742772 | 7.221761  | 14.713607 |
| C | 13.643239 | 6.739553  | 14.430543 |
| H | 13.464192 | 6.523513  | 15.490056 |
| C | 15.134145 | 7.421277  | 12.638668 |
| H | 16.124739 | 7.736488  | 12.291982 |
| C | 13.607587 | 9.617397  | 7.595292  |
| H | 13.057390 | 10.493775 | 7.205968  |
| H | 14.487726 | 9.998791  | 8.147216  |
| C | 14.806314 | 9.735047  | 5.423434  |
| H | 15.659548 | 10.239648 | 5.914104  |
| H | 15.199352 | 9.189312  | 4.545344  |
| H | 14.112517 | 10.514850 | 5.058445  |
| C | 15.143728 | 7.714444  | 6.857460  |
| H | 14.718143 | 6.987591  | 7.561368  |
| H | 15.534518 | 7.157812  | 5.985009  |
| H | 16.000437 | 8.209341  | 7.352346  |

---

**Table S58.** [CpNi<sup>I</sup>(Me<sub>2</sub>pdt)Fe<sup>I</sup>(dppe)(CO)]<sup>-</sup> with pdt Oriented Toward Ni ([**1c**]<sup>-</sup>, -3283.02866040 E<sub>h</sub>)

| atom | x         | y         | z         |
|------|-----------|-----------|-----------|
| Ni   | 10.478629 | 8.761776  | 7.613549  |
| Fe   | 11.848082 | 6.726621  | 8.706592  |
| P    | 11.392154 | 6.722411  | 10.864146 |
| S    | 12.387957 | 8.988831  | 8.865989  |
| P    | 10.693903 | 4.861488  | 8.597796  |
| S    | 11.558134 | 7.142792  | 6.430315  |
| C    | 10.917018 | 1.178740  | 6.629579  |
| H    | 10.350134 | 0.239233  | 6.623221  |
| C    | 12.060483 | 1.319170  | 5.824981  |
| H    | 12.390795 | 0.488919  | 5.188277  |
| C    | 7.838326  | 8.604969  | 11.991886 |
| H    | 6.765922  | 8.418289  | 11.858082 |
| C    | 7.894128  | 4.379129  | 9.224864  |
| H    | 8.211651  | 4.003207  | 10.204227 |
| C    | 8.275655  | 9.764655  | 12.656282 |
| H    | 7.548190  | 10.483632 | 13.051728 |
| C    | 9.415267  | 10.784713 | 7.605119  |
| H    | 9.958555  | 11.721117 | 7.755703  |
| C    | 9.653894  | 10.002443 | 12.787298 |
| H    | 10.010340 | 10.911919 | 13.286725 |
| C    | 13.423823 | 5.975896  | 8.739651  |
| C    | 12.351485 | 3.593640  | 6.650377  |
| H    | 12.898475 | 4.540238  | 6.658821  |
| C    | 9.123766  | 10.173494 | 6.346580  |
| H    | 9.396921  | 10.561325 | 5.361828  |
| C    | 13.775090 | 9.092036  | 6.261805  |
| C    | 6.080218  | 4.874212  | 7.675082  |
| H    | 5.009387  | 4.902743  | 7.440837  |
| C    | 11.209862 | 3.461590  | 7.464691  |
| C    | 12.773518 | 2.528862  | 5.835361  |
| H    | 13.661639 | 2.649949  | 5.203367  |
| C    | 10.585483 | 9.079971  | 12.284068 |
| H    | 11.656440 | 9.278049  | 12.394618 |
| C    | 8.451048  | 8.935833  | 6.604288  |
| H    | 8.125526  | 8.215951  | 5.850392  |
| O    | 14.513651 | 5.486421  | 8.728380  |
| C    | 10.875006 | 4.010084  | 10.272052 |
| H    | 10.212212 | 3.130549  | 10.379020 |
| H    | 11.916547 | 3.641291  | 10.275284 |
| C    | 7.027198  | 5.303145  | 6.726098  |
| H    | 6.694973  | 5.668367  | 5.746860  |
| C    | 10.664122 | 5.036732  | 11.394257 |
| H    | 11.135030 | 4.707507  | 12.338105 |
| H    | 9.588913  | 5.182456  | 11.595876 |
| C    | 10.159134 | 7.897294  | 11.637322 |
| C    | 10.492741 | 2.245212  | 7.438715  |
| H    | 9.584779  | 2.137366  | 8.044453  |
| C    | 8.924328  | 9.927263  | 8.644856  |
| H    | 8.996579  | 10.111525 | 9.717778  |
| C    | 8.325835  | 8.779118  | 8.023727  |

|   |           |           |           |
|---|-----------|-----------|-----------|
| H | 7.843608  | 7.945209  | 8.535368  |
| C | 6.520133  | 4.416483  | 8.927143  |
| H | 5.793824  | 4.077052  | 9.676570  |
| C | 13.224799 | 7.713252  | 5.815019  |
| H | 13.948027 | 6.928086  | 6.108370  |
| H | 13.156767 | 7.707144  | 4.708720  |
| C | 8.768941  | 7.691392  | 11.476160 |
| H | 8.404562  | 6.820706  | 10.918179 |
| C | 8.855042  | 4.807955  | 8.281080  |
| C | 8.395430  | 5.280638  | 7.026798  |
| H | 9.124821  | 5.640876  | 6.291303  |
| C | 12.791680 | 6.913563  | 12.099656 |
| C | 14.073497 | 7.302836  | 11.666004 |
| H | 14.226687 | 7.513827  | 10.604143 |
| C | 12.593239 | 6.657428  | 13.475921 |
| H | 11.594279 | 6.390655  | 13.842009 |
| C | 14.929933 | 7.149396  | 13.942971 |
| H | 15.759836 | 7.237089  | 14.655190 |
| C | 13.653951 | 6.767786  | 14.390144 |
| H | 13.481188 | 6.560868  | 15.453856 |
| C | 15.134817 | 7.421899  | 12.580297 |
| H | 16.125282 | 7.727982  | 12.222531 |
| C | 13.906119 | 9.199082  | 7.802911  |
| H | 14.310543 | 10.201687 | 8.048180  |
| H | 14.640710 | 8.448573  | 8.152927  |
| C | 12.927421 | 10.245886 | 5.692359  |
| H | 13.365813 | 11.224323 | 5.971100  |
| H | 12.885972 | 10.189328 | 4.586775  |
| H | 11.895213 | 10.200821 | 6.083182  |
| C | 15.210074 | 9.209174  | 5.681031  |
| H | 15.866300 | 8.402367  | 6.059293  |
| H | 15.193947 | 9.146116  | 4.575431  |
| H | 15.667995 | 10.179247 | 5.956455  |

---

**Table S59.** [CpNi<sup>I</sup>(Me<sub>2</sub>pdt)Fe<sup>I</sup>(dppe)(CO)]<sup>-</sup> with pdt Oriented Toward Fe ([1c]<sup>-</sup>, -3283.01962480 E<sub>h</sub>)

| atom | x         | y         | z         |
|------|-----------|-----------|-----------|
| Ni   | 10.585685 | 8.692379  | 7.753356  |
| Fe   | 11.945569 | 6.689170  | 8.748400  |
| P    | 11.350609 | 6.764153  | 10.922520 |
| S    | 12.580083 | 8.882782  | 8.834521  |
| P    | 10.760533 | 4.840451  | 8.639189  |
| S    | 11.568779 | 7.088213  | 6.405379  |
| C    | 11.010392 | 1.141824  | 6.707286  |
| H    | 10.458964 | 0.193274  | 6.713771  |
| C    | 12.144796 | 1.294450  | 5.891366  |
| H    | 12.482704 | 0.463821  | 5.259165  |
| C    | 7.741413  | 8.574106  | 11.977756 |
| H    | 6.676914  | 8.381371  | 11.795819 |
| C    | 7.966583  | 4.284729  | 9.204379  |
| H    | 8.285549  | 3.835534  | 10.151507 |
| C    | 8.138805  | 9.721522  | 12.687732 |
| H    | 7.389719  | 10.425757 | 13.068734 |
| C    | 9.723691  | 10.769547 | 7.776202  |
| H    | 10.351883 | 11.640505 | 7.980579  |
| C    | 9.510705  | 9.964968  | 12.880686 |
| H    | 9.839457  | 10.863050 | 13.418697 |
| C    | 13.404461 | 5.771511  | 9.022900  |
| C    | 12.407909 | 3.581084  | 6.692972  |
| H    | 12.929077 | 4.543339  | 6.680592  |
| C    | 9.442079  | 10.218667 | 6.483596  |
| H    | 9.805144  | 10.600516 | 5.525702  |
| C    | 14.077408 | 8.623070  | 6.239075  |
| C    | 6.153844  | 4.867991  | 7.686417  |
| H    | 5.084538  | 4.887966  | 7.443648  |
| C    | 11.277304 | 3.433458  | 7.521117  |
| C    | 12.837892 | 2.515225  | 5.883266  |
| H    | 13.717224 | 2.644351  | 5.240764  |
| C    | 10.469028 | 9.063758  | 12.393301 |
| H    | 11.532566 | 9.269260  | 12.554580 |
| C    | 8.616909  | 9.065604  | 6.673656  |
| H    | 8.268491  | 8.394278  | 5.885706  |
| O    | 14.381103 | 5.122374  | 9.251299  |
| C    | 10.917306 | 4.020717  | 10.325350 |
| H    | 10.279641 | 3.122698  | 10.430102 |
| H    | 11.968921 | 3.684553  | 10.365603 |
| C    | 7.094868  | 5.407054  | 6.790924  |
| H    | 6.760873  | 5.852826  | 5.846459  |
| C    | 10.637763 | 5.061174  | 11.419960 |
| H    | 11.067502 | 4.747768  | 12.388347 |
| H    | 9.551478  | 5.188478  | 11.567385 |
| C    | 10.082980 | 7.888442  | 11.704063 |
| C    | 10.577091 | 2.207828  | 7.511824  |
| H    | 9.676860  | 2.090154  | 8.127392  |
| C    | 9.072755  | 9.959808  | 8.763889  |
| H    | 9.100143  | 10.115695 | 9.843073  |
| C    | 8.396553  | 8.895688  | 8.080316  |



|   |           |           |           |
|---|-----------|-----------|-----------|
| H | 7.800084  | 8.108401  | 8.543336  |
| C | 6.593962  | 4.311156  | 8.896724  |
| H | 5.870879  | 3.889694  | 9.606257  |
| C | 12.755041 | 8.237725  | 5.536162  |
| H | 13.006513 | 7.742374  | 4.576345  |
| H | 12.187517 | 9.157660  | 5.300964  |
| C | 8.698934  | 7.679314  | 11.480189 |
| H | 8.362637  | 6.817499  | 10.891608 |
| C | 8.920576  | 4.823434  | 8.313227  |
| C | 8.462115  | 5.394471  | 7.102185  |
| H | 9.186085  | 5.844151  | 6.411777  |
| C | 12.725120 | 6.950695  | 12.186930 |
| C | 14.006602 | 7.376570  | 11.785990 |
| H | 14.174828 | 7.614613  | 10.731362 |
| C | 12.504843 | 6.671027  | 13.555485 |
| H | 11.505755 | 6.373634  | 13.896367 |
| C | 14.816890 | 7.217822  | 14.079842 |
| H | 15.628384 | 7.318800  | 14.811322 |
| C | 13.541208 | 6.799734  | 14.494490 |
| H | 13.349791 | 6.577992  | 15.552018 |
| C | 15.044310 | 7.510050  | 12.725261 |
| H | 16.034617 | 7.844034  | 12.392776 |
| C | 13.847447 | 9.408019  | 7.560032  |
| H | 13.533462 | 10.439021 | 7.306368  |
| H | 14.817323 | 9.485159  | 8.091267  |
| C | 14.835593 | 9.586893  | 5.284752  |
| H | 15.782105 | 9.933567  | 5.743758  |
| H | 15.088444 | 9.080068  | 4.333174  |
| H | 14.226727 | 10.479281 | 5.045055  |
| C | 14.965140 | 7.383040  | 6.459624  |
| H | 14.475497 | 6.660066  | 7.126940  |
| H | 15.172834 | 6.880867  | 5.494400  |
| H | 15.935297 | 7.669794  | 6.910077  |

---

**Table S60.**  $[\text{CpNi}^{\text{III}}(\text{Me}_2\text{pdt})\text{Fe}^{\text{II}}(\text{dppe})(\text{CO})]^{2+}$  with pdt Oriented Toward Ni  
 ( $[\mathbf{1c}]^{2+}$ ,  $-3282.50779488 E_h$ )

| atom | x         | y         | z         |
|------|-----------|-----------|-----------|
| Ni   | 10.494606 | 8.771781  | 7.591556  |
| Fe   | 11.664983 | 6.835433  | 8.692741  |
| P    | 11.335292 | 6.694550  | 11.015293 |
| S    | 12.252283 | 9.028945  | 8.874118  |
| P    | 10.608291 | 4.751402  | 8.601306  |
| S    | 11.481390 | 7.179393  | 6.455157  |
| C    | 10.924403 | 1.226425  | 6.513746  |
| H    | 10.344400 | 0.300587  | 6.443121  |
| C    | 12.115192 | 1.373274  | 5.781248  |
| H    | 12.465544 | 0.559531  | 5.138199  |
| C    | 7.846424  | 8.689944  | 12.061081 |
| H    | 6.767406  | 8.513616  | 11.999409 |
| C    | 7.819078  | 4.629434  | 9.249782  |
| H    | 8.100506  | 4.396701  | 10.281533 |
| C    | 8.336167  | 9.865218  | 12.659104 |
| H    | 7.638200  | 10.606031 | 13.062576 |
| C    | 9.499613  | 10.659885 | 7.586771  |
| H    | 10.000307 | 11.623139 | 7.699081  |
| C    | 9.722500  | 10.081758 | 12.747495 |
| H    | 10.108429 | 10.989861 | 13.222117 |
| C    | 13.272952 | 6.158102  | 8.695883  |
| C    | 12.404810 | 3.609764  | 6.694292  |
| H    | 12.989772 | 4.530598  | 6.752978  |
| C    | 9.218541  | 9.990542  | 6.367146  |
| H    | 9.451702  | 10.340025 | 5.360355  |
| C    | 13.718213 | 9.117000  | 6.297647  |
| C    | 6.061425  | 4.899539  | 7.584588  |
| H    | 4.998561  | 4.911963  | 7.322499  |
| C    | 11.213181 | 3.467568  | 7.435430  |
| C    | 12.851896 | 2.564598  | 5.870216  |
| H    | 13.777518 | 2.683371  | 5.297785  |
| C    | 10.621446 | 9.123819  | 12.251865 |
| H    | 11.698817 | 9.288251  | 12.353749 |
| C    | 8.586924  | 8.727433  | 6.700983  |
| H    | 8.269307  | 7.970278  | 5.982843  |
| O    | 14.369211 | 5.751082  | 8.651440  |
| C    | 10.836207 | 3.999127  | 10.294858 |
| H    | 10.189632 | 3.109488  | 10.402433 |
| H    | 11.880737 | 3.637443  | 10.302154 |
| C    | 7.035544  | 5.096308  | 6.588570  |
| H    | 6.731926  | 5.246700  | 5.546965  |
| C    | 10.601811 | 5.012079  | 11.424879 |
| H    | 11.059525 | 4.654325  | 12.362857 |
| H    | 9.528387  | 5.158752  | 11.625848 |
| C    | 10.135072 | 7.934886  | 11.659021 |
| C    | 10.468117 | 2.267107  | 7.334307  |
| H    | 9.529459  | 2.144989  | 7.885941  |
| C    | 9.024659  | 9.822146  | 8.680686  |
| H    | 9.108969  | 10.061045 | 9.742178  |
| C    | 8.417572  | 8.655570  | 8.124242  |

|   |           |           |           |
|---|-----------|-----------|-----------|
| H | 7.955222  | 7.836723  | 8.673798  |
| C | 6.455375  | 4.660647  | 8.911523  |
| H | 5.702046  | 4.474699  | 9.684142  |
| C | 13.159936 | 7.745886  | 5.843146  |
| H | 13.853003 | 6.931335  | 6.116169  |
| H | 13.050232 | 7.740620  | 4.744399  |
| C | 8.738336  | 7.733673  | 11.551970 |
| H | 8.335136  | 6.830447  | 11.080196 |
| C | 8.803556  | 4.836831  | 8.256690  |
| C | 8.398180  | 5.069599  | 6.919078  |
| H | 9.150109  | 5.186637  | 6.130009  |
| C | 12.805917 | 6.865885  | 12.107623 |
| C | 14.042949 | 7.359535  | 11.643799 |
| H | 14.164954 | 7.649489  | 10.597526 |
| C | 12.666783 | 6.523841  | 13.475475 |
| H | 11.706780 | 6.175559  | 13.872920 |
| C | 14.990453 | 7.129640  | 13.872656 |
| H | 15.839919 | 7.225387  | 14.556457 |
| C | 13.755987 | 6.653115  | 14.347857 |
| H | 13.637915 | 6.383964  | 15.402425 |
| C | 15.130378 | 7.487971  | 12.523421 |
| H | 16.087798 | 7.865981  | 12.150638 |
| C | 13.798014 | 9.258463  | 7.837517  |
| H | 14.130578 | 10.279975 | 8.093292  |
| H | 14.533747 | 8.550270  | 8.256863  |
| C | 12.945249 | 10.288808 | 5.660465  |
| H | 13.414011 | 11.251658 | 5.929420  |
| H | 12.957116 | 10.207139 | 4.559383  |
| H | 11.893562 | 10.318031 | 5.989833  |
| C | 15.190507 | 9.163952  | 5.788516  |
| H | 15.802163 | 8.346894  | 6.210506  |
| H | 15.219264 | 9.083223  | 4.687889  |
| H | 15.661307 | 10.124219 | 6.062309  |

---

**Table S61.**  $[\text{CpNi}^{\text{III}}(\text{Me}_2\text{pdt})\text{Fe}^{\text{II}}(\text{dppe})(\text{CO})]^{2+}$  with pdt Oriented Toward Fe ( $[\mathbf{1c}]^{2+}$ ,  $-3282.49907273 E_{\text{h}}$ )

| atom | x         | y         | z         |
|------|-----------|-----------|-----------|
| Ni   | 10.452161 | 8.636393  | 7.706434  |
| Fe   | 11.832651 | 6.760167  | 8.718675  |
| P    | 11.347994 | 6.715521  | 11.048407 |
| S    | 12.274474 | 8.979484  | 8.876427  |
| P    | 10.587544 | 4.748881  | 8.595646  |
| S    | 11.518436 | 7.144215  | 6.507606  |
| C    | 11.021149 | 1.165895  | 6.639567  |
| H    | 10.479286 | 0.214891  | 6.616797  |
| C    | 12.188058 | 1.334826  | 5.874014  |
| H    | 12.558191 | 0.512619  | 5.253193  |
| C    | 7.945355  | 8.822770  | 12.152336 |
| H    | 6.860041  | 8.684030  | 12.107770 |
| C    | 7.782336  | 4.761715  | 9.144895  |
| H    | 8.023240  | 4.623165  | 10.203635 |
| C    | 8.485302  | 9.975738  | 12.751158 |
| H    | 7.819870  | 10.736257 | 13.172490 |
| C    | 9.539173  | 10.564224 | 7.609777  |
| H    | 10.070986 | 11.511927 | 7.711433  |
| C    | 9.878863  | 10.144065 | 12.817022 |
| H    | 10.303995 | 11.035227 | 13.290093 |
| C    | 13.250563 | 5.745877  | 9.025394  |
| C    | 12.404411 | 3.614662  | 6.697197  |
| H    | 12.946900 | 4.564002  | 6.704801  |
| C    | 9.277874  | 9.868020  | 6.404206  |
| H    | 9.560965  | 10.176268 | 5.396586  |
| C    | 14.034299 | 8.754330  | 6.473466  |
| C    | 6.089106  | 4.925618  | 7.401628  |
| H    | 5.036162  | 4.943727  | 7.102462  |
| C    | 11.237937 | 3.448708  | 7.473178  |
| C    | 12.874703 | 2.558599  | 5.900365  |
| H    | 13.779907 | 2.694223  | 5.299730  |
| C    | 10.735669 | 9.158827  | 12.300793 |
| H    | 11.819409 | 9.284780  | 12.387705 |
| C    | 8.576476  | 8.642492  | 6.754759  |
| H    | 8.250357  | 7.876155  | 6.050367  |
| O    | 14.157782 | 5.045025  | 9.250065  |
| C    | 10.736963 | 4.025198  | 10.311523 |
| H    | 10.036073 | 3.178302  | 10.422145 |
| H    | 11.757165 | 3.603076  | 10.348516 |
| C    | 7.100272  | 5.001448  | 6.426733  |
| H    | 6.835967  | 5.065644  | 5.365783  |
| C    | 10.534566 | 5.062710  | 11.426539 |
| H    | 10.955457 | 4.687748  | 12.375313 |
| H    | 9.466168  | 5.260566  | 11.608251 |
| C    | 10.198883 | 7.993511  | 11.704428 |
| C    | 10.539593 | 2.216744  | 7.432097  |
| H    | 9.617980  | 2.077048  | 8.007887  |
| C    | 8.990250  | 9.781272  | 8.712196  |
| H    | 9.044686  | 10.053784 | 9.767151  |
| C    | 8.351374  | 8.626946  | 8.169991  |

|   |           |           |           |
|---|-----------|-----------|-----------|
| H | 7.835777  | 7.844524  | 8.725344  |
| C | 6.432113  | 4.799985  | 8.758148  |
| H | 5.648606  | 4.708964  | 9.517662  |
| C | 12.901983 | 8.086655  | 5.660173  |
| H | 13.333296 | 7.352298  | 4.956399  |
| H | 12.349326 | 8.834862  | 5.064703  |
| C | 8.794708  | 7.841930  | 11.618888 |
| H | 8.351301  | 6.960844  | 11.142080 |
| C | 8.803744  | 4.845220  | 8.171285  |
| C | 8.450595  | 4.962964  | 6.804846  |
| H | 9.229998  | 4.985714  | 6.034948  |
| C | 12.824396 | 6.826464  | 12.141260 |
| C | 14.064035 | 7.322034  | 11.683987 |
| H | 14.184669 | 7.634908  | 10.642836 |
| C | 12.684752 | 6.452754  | 13.500261 |
| H | 11.722892 | 6.104808  | 13.893219 |
| C | 15.014774 | 7.028873  | 13.904613 |
| H | 15.867013 | 7.100414  | 14.587927 |
| C | 13.778329 | 6.550069  | 14.371656 |
| H | 13.661262 | 6.254670  | 15.419286 |
| C | 15.153754 | 7.420454  | 12.564296 |
| H | 16.113176 | 7.800605  | 12.198894 |
| C | 13.521499 | 9.633543  | 7.636675  |
| H | 13.025105 | 10.543389 | 7.254910  |
| H | 14.374365 | 9.956294  | 8.260572  |
| C | 14.744966 | 9.731030  | 5.485168  |
| H | 15.586657 | 10.240077 | 5.986320  |
| H | 15.158032 | 9.175088  | 4.625497  |
| H | 14.056318 | 10.502762 | 5.098112  |
| C | 15.073375 | 7.725015  | 6.955118  |
| H | 14.648865 | 7.000254  | 7.665022  |
| H | 15.484838 | 7.158266  | 6.101570  |
| H | 15.917564 | 8.230516  | 7.456081  |

---

**Table S62.** [Cp'Ni<sup>II</sup>(pdt)Fe<sup>II</sup>(dppe)(CO)]<sup>+</sup> with pdt Oriented Toward Ni  
 ([1d]<sup>+</sup>, -3243.53112609 E<sub>h</sub>)

| atom | x         | y         | z         |
|------|-----------|-----------|-----------|
| Ni   | 12.058793 | 8.651948  | 2.018238  |
| Fe   | 10.977570 | 9.463622  | 4.213653  |
| S    | 12.799230 | 10.348382 | 3.211936  |
| S    | 10.019935 | 9.462892  | 2.161256  |
| P    | 12.199960 | 9.028180  | 6.088662  |
| P    | 9.456399  | 7.980526  | 5.004553  |
| O    | 9.769977  | 11.890664 | 5.244190  |
| C    | 11.791399 | 10.417054 | 8.566624  |
| H    | 11.347459 | 9.501178  | 8.968821  |
| C    | 4.907827  | 9.014940  | 5.224491  |
| H    | 3.840890  | 9.252947  | 5.291534  |
| C    | 5.384071  | 7.780408  | 5.699441  |
| H    | 4.690549  | 7.053151  | 6.135140  |
| C    | 15.040147 | 9.126886  | 6.524861  |
| H    | 14.878659 | 10.083231 | 7.030973  |
| C    | 15.483601 | 6.650321  | 5.270888  |
| H    | 15.649754 | 5.678739  | 4.792242  |
| C    | 6.748498  | 7.472106  | 5.611419  |
| H    | 7.103802  | 6.497696  | 5.965633  |
| C    | 13.758443 | 7.452714  | 1.846139  |
| H    | 14.616801 | 7.548869  | 2.512891  |
| C    | 13.948368 | 8.418195  | 5.982353  |
| C    | 10.243641 | 10.873765 | 4.886411  |
| C    | 8.684961  | 6.140454  | 3.016871  |
| H    | 8.133018  | 6.988039  | 2.596106  |
| C    | 9.316159  | 3.789288  | 2.918499  |
| H    | 9.269197  | 2.814455  | 2.421749  |
| C    | 8.634800  | 4.893014  | 2.376069  |
| H    | 8.046116  | 4.778888  | 1.458972  |
| C    | 12.285483 | 10.465681 | 7.246101  |
| C    | 12.919093 | 12.801848 | 7.602842  |
| H    | 13.360993 | 13.728911 | 7.222123  |
| C    | 5.800583  | 9.938476  | 4.660800  |
| H    | 5.434634  | 10.900105 | 4.285387  |
| C    | 9.417171  | 6.302511  | 4.216615  |
| C    | 12.423132 | 12.742830 | 8.916023  |
| H    | 12.474827 | 13.624453 | 9.563453  |
| C    | 11.753363 | 8.222699  | -1.291108 |
| H    | 10.663364 | 8.379539  | -1.223518 |
| H    | 11.923912 | 7.440018  | -2.055054 |
| H    | 12.219775 | 9.151421  | -1.660242 |
| C    | 11.370065 | 7.639970  | 7.039417  |
| H    | 11.817582 | 6.713104  | 6.640969  |
| H    | 11.638147 | 7.675984  | 8.109930  |
| C    | 16.566323 | 7.366251  | 5.810896  |
| H    | 17.580303 | 6.957032  | 5.749920  |
| C    | 7.169984  | 9.635365  | 4.575514  |
| H    | 7.857020  | 10.361982 | 4.135360  |
| C    | 10.042052 | 3.938655  | 4.110708  |
| H    | 10.559304 | 3.079597  | 4.551890  |

|   |           |           |           |
|---|-----------|-----------|-----------|
| C | 12.624992 | 6.602522  | 2.045397  |
| H | 12.441942 | 5.925255  | 2.878845  |
| C | 13.587875 | 8.158415  | 0.583289  |
| H | 14.300191 | 8.866822  | 0.155733  |
| C | 10.093093 | 5.186295  | 4.756197  |
| H | 10.645703 | 5.268560  | 5.697793  |
| C | 16.340700 | 8.602963  | 6.433799  |
| H | 17.178090 | 9.163589  | 6.862876  |
| C | 12.374859 | 11.893995 | 2.255440  |
| H | 11.943116 | 12.598081 | 2.989410  |
| H | 13.347105 | 12.298449 | 1.924048  |
| C | 11.716364 | 6.867769  | 0.973080  |
| H | 10.725802 | 6.423824  | 0.858513  |
| C | 11.856376 | 11.551409 | 9.392815  |
| H | 11.463576 | 11.498154 | 10.413779 |
| C | 10.055361 | 11.172567 | 1.411554  |
| H | 9.429126  | 11.100691 | 0.505567  |
| H | 9.542869  | 11.836813 | 2.130029  |
| C | 9.852309  | 7.665190  | 6.815159  |
| H | 9.388217  | 8.505869  | 7.362599  |
| H | 9.369017  | 6.735995  | 7.166516  |
| C | 12.334475 | 7.796580  | 0.027520  |
| C | 14.186056 | 7.177433  | 5.348119  |
| H | 13.350406 | 6.617930  | 4.911609  |
| C | 11.444035 | 11.705791 | 1.056605  |
| H | 11.921749 | 11.033012 | 0.320004  |
| H | 11.319265 | 12.689823 | 0.560081  |
| C | 7.656964  | 8.402795  | 5.054367  |
| C | 12.841388 | 11.676558 | 6.770005  |
| H | 13.217697 | 11.735586 | 5.742107  |

---

**Table S63.** [Cp'Ni<sup>II</sup>(pdt)Fe<sup>II</sup>(dppe)(CO)]<sup>+</sup> with pdt Oriented Toward Fe ([1d]<sup>+</sup>, -3243.53221453 E<sub>h</sub>)

| atom | x         | y         | z         |
|------|-----------|-----------|-----------|
| Ni   | 12.067660 | 8.632248  | 2.080501  |
| Fe   | 10.954919 | 9.497154  | 4.224798  |
| S    | 12.790833 | 10.362132 | 3.226488  |
| S    | 10.031926 | 9.440754  | 2.155960  |
| P    | 12.188778 | 9.039194  | 6.086009  |
| P    | 9.444567  | 7.991765  | 4.987021  |
| O    | 9.655707  | 11.794669 | 5.438724  |
| C    | 11.897944 | 10.360286 | 8.620549  |
| H    | 11.519846 | 9.419821  | 9.032736  |
| C    | 4.896959  | 9.036863  | 5.178515  |
| H    | 3.829944  | 9.276774  | 5.236732  |
| C    | 5.378345  | 7.835091  | 5.726662  |
| H    | 4.688689  | 7.134927  | 6.210201  |
| C    | 15.032169 | 9.181148  | 6.447779  |
| H    | 14.868048 | 10.156148 | 6.916026  |
| C    | 15.483707 | 6.659776  | 5.291226  |
| H    | 15.653109 | 5.671122  | 4.850246  |
| C    | 6.742996  | 7.524686  | 5.650928  |
| H    | 7.101434  | 6.574385  | 6.062813  |
| C    | 13.793251 | 7.456845  | 1.890983  |
| H    | 14.654801 | 7.561485  | 2.552220  |
| C    | 13.938348 | 8.433919  | 5.963405  |
| C    | 10.175475 | 10.843495 | 4.979610  |
| C    | 8.652481  | 6.158954  | 3.000088  |
| H    | 8.096967  | 7.007770  | 2.586959  |
| C    | 9.279343  | 3.807287  | 2.889630  |
| H    | 9.225552  | 2.833554  | 2.391412  |
| C    | 8.593900  | 4.913048  | 2.356927  |
| H    | 7.995532  | 4.802104  | 1.445791  |
| C    | 12.287676 | 10.457347 | 7.268103  |
| C    | 12.866103 | 12.806222 | 7.637034  |
| H    | 13.245061 | 13.757423 | 7.248130  |
| C    | 5.784578  | 9.924876  | 4.553103  |
| H    | 5.414207  | 10.860414 | 4.120440  |
| C    | 9.398758  | 6.317505  | 4.191281  |
| C    | 12.472044 | 12.699271 | 8.981170  |
| H    | 12.540772 | 13.567291 | 9.645190  |
| C    | 11.741707 | 8.238860  | -1.211907 |
| H    | 10.647807 | 8.362368  | -1.133403 |
| H    | 11.927306 | 7.479632  | -1.995777 |
| H    | 12.179421 | 9.188682  | -1.562676 |
| C    | 11.359354 | 7.637252  | 7.015580  |
| H    | 11.803894 | 6.715179  | 6.603682  |
| H    | 11.627235 | 7.655009  | 8.086285  |
| C    | 16.567735 | 7.412922  | 5.774873  |
| H    | 17.585913 | 7.015151  | 5.708393  |
| C    | 7.154258  | 9.620073  | 4.480185  |
| H    | 7.838386  | 10.317782 | 3.990849  |
| C    | 10.018335 | 3.953035  | 4.074298  |
| H    | 10.538732 | 3.092187  | 4.508227  |



|   |           |           |           |
|---|-----------|-----------|-----------|
| C | 12.682232 | 6.577818  | 2.084484  |
| H | 12.521845 | 5.885970  | 2.910405  |
| C | 13.596324 | 8.179519  | 0.641802  |
| H | 14.290015 | 8.908550  | 0.218175  |
| C | 10.078971 | 5.199311  | 4.721176  |
| H | 10.642364 | 5.278707  | 5.656578  |
| C | 16.338000 | 8.672527  | 6.348542  |
| H | 17.176379 | 9.263195  | 6.733015  |
| C | 12.418834 | 11.830754 | 2.137894  |
| H | 12.943148 | 12.673347 | 2.623759  |
| H | 12.919761 | 11.638190 | 1.171993  |
| C | 11.758003 | 6.838826  | 1.026806  |
| H | 10.775990 | 6.375683  | 0.913902  |
| C | 11.984828 | 11.477093 | 9.468106  |
| H | 11.671792 | 11.386042 | 10.513668 |
| C | 10.123760 | 11.074552 | 1.261019  |
| H | 10.511991 | 10.852114 | 0.250383  |
| H | 9.071213  | 11.392422 | 1.152155  |
| C | 9.841210  | 7.667513  | 6.795020  |
| H | 9.380610  | 8.505666  | 7.349193  |
| H | 9.359015  | 6.736514  | 7.142649  |
| C | 12.345309 | 7.799874  | 0.092257  |
| C | 14.180287 | 7.171153  | 5.376184  |
| H | 13.345670 | 6.581551  | 4.979844  |
| C | 10.940664 | 12.167250 | 1.948289  |
| H | 10.875440 | 13.083591 | 1.327193  |
| H | 10.486734 | 12.414988 | 2.923499  |
| C | 7.646649  | 8.421244  | 5.033465  |
| C | 12.764956 | 11.697995 | 6.783980  |
| H | 13.058708 | 11.794029 | 5.732479  |

---

**Table S64.** [Cp'Ni<sup>I</sup>(pdt)Fe<sup>II</sup>(dppe)(CO)]<sup>0</sup> with pdt Oriented Toward Ni  
 ([1d]<sup>0</sup>, -3243.69475486 E<sub>h</sub>)

| atom | x         | y         | z         |
|------|-----------|-----------|-----------|
| Ni   | 2.418910  | 6.014624  | 2.113318  |
| Fe   | 1.587422  | 5.966243  | 4.499639  |
| S    | 0.976136  | 7.552749  | 2.988160  |
| P    | 2.628793  | 7.504514  | 5.754164  |
| O    | -0.867106 | 5.881013  | 6.066544  |
| C    | 4.535889  | 6.358528  | 1.823239  |
| H    | 5.206282  | 6.638242  | 2.636561  |
| C    | 3.825104  | 7.262718  | 0.972240  |
| H    | 3.814205  | 8.350152  | 1.054769  |
| C    | 3.045873  | 6.480629  | 0.056886  |
| H    | 2.377144  | 6.871132  | -0.714294 |
| C    | -0.727783 | 7.200883  | 2.322898  |
| H    | -1.423873 | 7.207476  | 3.181967  |
| H    | -0.972160 | 8.071887  | 1.688013  |
| C    | -0.872392 | 5.909074  | 1.515049  |
| H    | -0.162399 | 5.929232  | 0.666297  |
| H    | -1.896956 | 5.881798  | 1.085644  |
| C    | 0.167000  | 5.911299  | 5.487040  |
| C    | 3.069221  | 6.653634  | 7.369910  |
| C    | 5.469418  | 8.040895  | 5.788424  |
| H    | 5.547882  | 7.382389  | 6.660251  |
| C    | 6.635572  | 8.654264  | 5.295339  |
| H    | 7.598476  | 8.455388  | 5.779993  |
| C    | 6.564090  | 9.525526  | 4.198441  |
| H    | 7.471319  | 10.006941 | 3.816785  |
| C    | 5.319858  | 9.780769  | 3.594420  |
| H    | 5.254340  | 10.465806 | 2.741486  |
| C    | 4.158391  | 9.161946  | 4.077215  |
| H    | 3.193559  | 9.359584  | 3.595799  |
| C    | 2.435369  | 9.978888  | 7.142189  |
| H    | 3.513929  | 9.871279  | 7.305883  |
| C    | 1.737145  | 9.012172  | 6.383648  |
| C    | 0.357231  | 9.187295  | 6.159419  |
| H    | -0.189886 | 8.455424  | 5.560925  |
| C    | -0.313642 | 10.300858 | 6.692518  |
| H    | -1.386724 | 10.424514 | 6.507743  |
| C    | 0.385501  | 11.251190 | 7.451933  |
| H    | -0.139106 | 12.120212 | 7.865202  |
| C    | 1.763234  | 11.088092 | 7.675972  |
| H    | 2.317969  | 11.829020 | 8.263109  |
| H    | 3.730217  | 7.278760  | 7.997962  |
| H    | 4.739218  | 5.337276  | 6.850361  |
| H    | 2.104142  | 6.563145  | 7.900686  |
| S    | 1.074696  | 4.361197  | 2.956344  |
| C    | -0.656533 | 4.626680  | 2.322902  |
| H    | -1.340283 | 4.589370  | 3.190991  |
| H    | -0.869133 | 3.744735  | 1.691692  |
| C    | 3.668080  | 5.265062  | 7.103229  |
| C    | 4.181965  | 3.528336  | 4.805858  |
| C    | 5.430311  | 4.155226  | 4.594993  |

|   |           |          |           |
|---|-----------|----------|-----------|
| H | 5.593598  | 5.188689 | 4.921936  |
| C | 6.470423  | 3.478756 | 3.939705  |
| H | 7.434780  | 3.978676 | 3.794442  |
| C | 6.272339  | 2.172866 | 3.459638  |
| H | 7.083801  | 1.646008 | 2.945231  |
| C | 5.024997  | 1.552734 | 3.635005  |
| H | 4.856175  | 0.538466 | 3.255544  |
| C | 3.987932  | 2.222302 | 4.305287  |
| H | 3.023753  | 1.723673 | 4.445438  |
| C | 2.590606  | 2.196845 | 7.387144  |
| H | 3.653745  | 2.369381 | 7.592388  |
| C | 1.903576  | 3.020346 | 6.465023  |
| C | 0.551277  | 2.742874 | 6.186509  |
| H | 0.016669  | 3.356505 | 5.457778  |
| C | -0.106841 | 1.680185 | 6.829451  |
| H | -1.160484 | 1.481568 | 6.603174  |
| C | 0.578967  | 0.880061 | 7.755207  |
| H | 0.063930  | 0.053860 | 8.258405  |
| C | 1.932881  | 1.138568 | 8.030602  |
| H | 2.479990  | 0.512031 | 8.744387  |
| H | 3.585186  | 4.617849 | 7.993156  |
| C | 4.234208  | 5.016667 | 1.392448  |
| H | 4.619678  | 4.099087 | 1.838830  |
| C | 3.320550  | 5.085643 | 0.293261  |
| C | 4.217567  | 8.282970 | 5.183810  |
| P | 2.786192  | 4.438547 | 5.636536  |
| C | 2.771645  | 3.920852 | -0.486436 |
| H | 1.802873  | 4.169727 | -0.954906 |
| H | 3.462323  | 3.619445 | -1.299131 |
| H | 2.618521  | 3.041081 | 0.162566  |

---

**Table S65.** [Cp'Ni<sup>I</sup>(pdt)Fe<sup>II</sup>(dppe)(CO)]<sup>0</sup> with pdt Oriented Toward Fe  
 ([1d]<sup>0</sup>, -3243.69298779 E<sub>h</sub>)

| atom | x         | y         | z         |
|------|-----------|-----------|-----------|
| Ni   | 2.441699  | 6.009024  | 2.152533  |
| Fe   | 1.564009  | 5.964721  | 4.513226  |
| S    | 0.980855  | 7.547784  | 2.979778  |
| P    | 2.622538  | 7.505509  | 5.743942  |
| O    | -0.746272 | 5.889819  | 6.294450  |
| C    | 4.576444  | 6.343177  | 1.811498  |
| H    | 5.271461  | 6.613274  | 2.607335  |
| C    | 3.842890  | 7.257784  | 0.992643  |
| H    | 3.841496  | 8.344617  | 1.083243  |
| C    | 3.030341  | 6.487681  | 0.095365  |
| H    | 2.341750  | 6.887676  | -0.653261 |
| C    | -0.664426 | 7.190747  | 2.173162  |
| H    | -1.314810 | 8.047449  | 2.427846  |
| H    | -0.489876 | 7.213593  | 1.081559  |
| C    | -1.344049 | 5.883813  | 2.584612  |
| H    | -2.347377 | 5.854731  | 2.108506  |
| H    | -1.512640 | 5.881606  | 3.676168  |
| C    | 0.211099  | 5.915001  | 5.595232  |
| C    | 3.058259  | 6.656705  | 7.361721  |
| C    | 5.462271  | 8.036338  | 5.784030  |
| H    | 5.536776  | 7.378501  | 6.656682  |
| C    | 6.630593  | 8.649655  | 5.296187  |
| H    | 7.591132  | 8.451654  | 5.785824  |
| C    | 6.564057  | 9.519631  | 4.197950  |
| H    | 7.472950  | 10.001091 | 3.820316  |
| C    | 5.322902  | 9.773477  | 3.587238  |
| H    | 5.261478  | 10.457081 | 2.732881  |
| C    | 4.159232  | 9.154659  | 4.064722  |
| H    | 3.196897  | 9.350778  | 3.577809  |
| C    | 2.424371  | 9.969067  | 7.147867  |
| H    | 3.497584  | 9.847570  | 7.335625  |
| C    | 1.732513  | 9.016869  | 6.365610  |
| C    | 0.360753  | 9.210424  | 6.108962  |
| H    | -0.177866 | 8.490575  | 5.488066  |
| C    | -0.309112 | 10.327933 | 6.634953  |
| H    | -1.375819 | 10.466637 | 6.425529  |
| C    | 0.382911  | 11.263244 | 7.419166  |
| H    | -0.141118 | 12.135042 | 7.827283  |
| C    | 1.752956  | 11.082060 | 7.674534  |
| H    | 2.302185  | 11.811729 | 8.280609  |
| H    | 3.721863  | 7.279836  | 7.988788  |
| H    | 4.724467  | 5.330209  | 6.853681  |
| H    | 2.092463  | 6.572257  | 7.891994  |
| S    | 1.083974  | 4.360215  | 2.955228  |
| C    | -0.593242 | 4.614871  | 2.177297  |
| H    | -1.190315 | 3.724603  | 2.447571  |
| H    | -0.434370 | 4.591792  | 1.083199  |
| C    | 3.651355  | 5.264430  | 7.099772  |
| C    | 4.176704  | 3.537323  | 4.797872  |
| C    | 5.421305  | 4.172473  | 4.590953  |

|   |           |          |           |
|---|-----------|----------|-----------|
| H | 5.574852  | 5.208388 | 4.914499  |
| C | 6.469369  | 3.500656 | 3.943776  |
| H | 7.430904  | 4.006685 | 3.801175  |
| C | 6.282516  | 2.191623 | 3.467750  |
| H | 7.100180  | 1.668387 | 2.959496  |
| C | 5.038589  | 1.563586 | 3.638768  |
| H | 4.878598  | 0.546915 | 3.261990  |
| C | 3.993565  | 2.228415 | 4.301412  |
| H | 3.032090  | 1.723821 | 4.438397  |
| C | 2.578518  | 2.193406 | 7.377196  |
| H | 3.638096  | 2.373328 | 7.594156  |
| C | 1.895263  | 3.012821 | 6.448828  |
| C | 0.547934  | 2.726165 | 6.155192  |
| H | 0.018099  | 3.337444 | 5.420446  |
| C | -0.109049 | 1.657894 | 6.789756  |
| H | -1.158818 | 1.451776 | 6.552370  |
| C | 0.572704  | 0.861568 | 7.721872  |
| H | 0.058292  | 0.031044 | 8.218542  |
| C | 1.921604  | 1.129460 | 8.012191  |
| H | 2.465516  | 0.505985 | 8.731060  |
| H | 3.559005  | 4.619069 | 7.990071  |
| C | 4.253637  | 5.008228 | 1.382347  |
| H | 4.646048  | 4.084780 | 1.810399  |
| C | 3.303895  | 5.090104 | 0.313658  |
| C | 4.213617  | 8.277440 | 5.172597  |
| P | 2.775701  | 4.437384 | 5.629592  |
| C | 2.727056  | 3.934801 | -0.460268 |
| H | 1.751182  | 4.196210 | -0.907256 |
| H | 3.396567  | 3.631444 | -1.289887 |
| H | 2.578820  | 3.052212 | 0.186189  |

---

**Table S66.** [Cp'Ni<sup>I</sup>(pdt)Fe<sup>I</sup>(dppe)(CO)]<sup>-</sup> with pdt Oriented Toward Ni  
 ([1d]<sup>-</sup>, -E<sub>h</sub>)

| atom | x         | y         | z         |
|------|-----------|-----------|-----------|
| Ni   | 2.424831  | 6.026410  | 2.016487  |
| Fe   | 1.559902  | 5.978417  | 4.579562  |
| S    | 1.042710  | 7.564710  | 2.966099  |
| P    | 2.614350  | 7.474650  | 5.796996  |
| O    | -0.951623 | 5.906030  | 6.106366  |
| C    | 4.527669  | 6.376167  | 1.580157  |
| H    | 5.214680  | 6.685514  | 2.369148  |
| C    | 3.786558  | 7.246838  | 0.715527  |
| H    | 3.766040  | 8.337869  | 0.766138  |
| C    | 3.020370  | 6.433737  | -0.183923 |
| H    | 2.331771  | 6.796890  | -0.952660 |
| C    | -0.697482 | 7.210704  | 2.396220  |
| H    | -1.349195 | 7.208562  | 3.291151  |
| H    | -0.991447 | 8.071491  | 1.765491  |
| C    | -0.876926 | 5.910091  | 1.603923  |
| H    | -0.196948 | 5.926017  | 0.729826  |
| H    | -1.920304 | 5.881081  | 1.214819  |
| C    | 0.085179  | 5.928095  | 5.513361  |
| C    | 3.036619  | 6.643118  | 7.436302  |
| C    | 5.454314  | 8.091909  | 5.969539  |
| H    | 5.491434  | 7.516356  | 6.901500  |
| C    | 6.641224  | 8.669078  | 5.483627  |
| H    | 7.577886  | 8.529920  | 6.038393  |
| C    | 6.626729  | 9.428350  | 4.302868  |
| H    | 7.550985  | 9.880482  | 3.923663  |
| C    | 5.414818  | 9.596844  | 3.606562  |
| H    | 5.391870  | 10.181317 | 2.678985  |
| C    | 4.234705  | 9.008732  | 4.080489  |
| H    | 3.301287  | 9.121920  | 3.516228  |
| C    | 2.427562  | 9.962162  | 7.215136  |
| H    | 3.497503  | 9.832066  | 7.418046  |
| C    | 1.746378  | 9.012468  | 6.422496  |
| C    | 0.381172  | 9.216896  | 6.141590  |
| H    | -0.143813 | 8.489762  | 5.516193  |
| C    | -0.291221 | 10.341132 | 6.651551  |
| H    | -1.353023 | 10.488133 | 6.419415  |
| C    | 0.392064  | 11.274620 | 7.447648  |
| H    | -0.133780 | 12.152242 | 7.844050  |
| C    | 1.755315  | 11.082977 | 7.729114  |
| H    | 2.298895  | 11.810366 | 8.345177  |
| H    | 3.689695  | 7.264654  | 8.077871  |
| H    | 4.711386  | 5.339989  | 6.909496  |
| H    | 2.063207  | 6.546919  | 7.950114  |
| S    | 1.140408  | 4.364629  | 2.940461  |
| C    | -0.625593 | 4.626649  | 2.405819  |
| H    | -1.262720 | 4.608556  | 3.311042  |
| H    | -0.890867 | 3.747859  | 1.787243  |
| C    | 3.639071  | 5.258642  | 7.158498  |
| C    | 4.182253  | 3.578661  | 4.844977  |
| C    | 5.383021  | 4.274877  | 4.572151  |

|   |           |          |           |
|---|-----------|----------|-----------|
| H | 5.479936  | 5.328985 | 4.858179  |
| C | 6.446291  | 3.646945 | 3.908068  |
| H | 7.369581  | 4.206369 | 3.714935  |
| C | 6.321647  | 2.316128 | 3.469624  |
| H | 7.149278  | 1.827977 | 2.941033  |
| C | 5.118738  | 1.627731 | 3.695869  |
| H | 5.000599  | 0.595661 | 3.342855  |
| C | 4.059950  | 2.251199 | 4.377101  |
| H | 3.129169  | 1.701365 | 4.549342  |
| C | 2.576372  | 2.177822 | 7.382375  |
| H | 3.639764  | 2.347846 | 7.590543  |
| C | 1.897507  | 3.012611 | 6.464972  |
| C | 0.545566  | 2.739942 | 6.180104  |
| H | 0.022274  | 3.376794 | 5.461523  |
| C | -0.116867 | 1.668518 | 6.804183  |
| H | -1.169660 | 1.472058 | 6.568095  |
| C | 0.563167  | 0.855147 | 7.726078  |
| H | 0.043974  | 0.022655 | 8.217109  |
| C | 1.914182  | 1.111301 | 8.013083  |
| H | 2.456812  | 0.477082 | 8.725470  |
| H | 3.551681  | 4.593485 | 8.036493  |
| C | 4.212868  | 5.025396 | 1.205832  |
| H | 4.608413  | 4.122267 | 1.675052  |
| C | 3.287449  | 5.058712 | 0.106558  |
| C | 4.230822  | 8.251963 | 5.278999  |
| P | 2.754491  | 4.472046 | 5.657614  |
| C | 2.705658  | 3.861639 | -0.598210 |
| H | 1.857229  | 4.154353 | -1.244463 |
| H | 3.450407  | 3.350000 | -1.243820 |
| H | 2.330561  | 3.114773 | 0.126660  |

---

**Table S67.** [Cp'Ni<sup>I</sup>(pdt)Fe<sup>I</sup>(dppe)(CO)]<sup>-</sup> with pdt Oriented Toward Fe ([1d]<sup>-</sup>, -3243.72112875 E<sub>h</sub>)

| atom | x         | y         | z         |
|------|-----------|-----------|-----------|
| Ni   | 10.365344 | 8.676106  | 7.402488  |
| Fe   | 11.781234 | 6.738697  | 8.784741  |
| P    | 11.413896 | 6.756595  | 10.954051 |
| S    | 12.053144 | 9.073015  | 8.901104  |
| P    | 10.578463 | 4.882637  | 8.730467  |
| S    | 11.636962 | 7.024125  | 6.495469  |
| C    | 10.672919 | 1.194584  | 6.755649  |
| H    | 10.045901 | 0.295334  | 6.706633  |
| C    | 11.873865 | 1.258520  | 6.029106  |
| H    | 12.189054 | 0.409010  | 5.410298  |
| C    | 8.249131  | 9.332250  | 11.696822 |
| H    | 7.460940  | 9.797929  | 11.093316 |
| C    | 7.793236  | 4.459244  | 9.464669  |
| H    | 8.133173  | 4.108738  | 10.445629 |
| C    | 8.296531  | 9.545804  | 13.083923 |
| H    | 7.542975  | 10.176706 | 13.571723 |
| C    | 9.525851  | 10.715983 | 6.740439  |
| H    | 10.134172 | 11.624630 | 6.710799  |
| C    | 9.318013  | 8.951782  | 13.845262 |
| H    | 9.363869  | 9.116077  | 14.929385 |
| C    | 13.352026 | 5.978172  | 8.945555  |
| C    | 12.260722 | 3.508308  | 6.883586  |
| H    | 12.865522 | 4.418290  | 6.928601  |
| C    | 9.353753  | 9.797382  | 5.657886  |
| C    | 14.091243 | 8.507268  | 6.934376  |
| H    | 14.973762 | 8.940295  | 6.410956  |
| H    | 14.473015 | 7.702029  | 7.585617  |
| C    | 5.939545  | 4.949349  | 7.960302  |
| H    | 4.862261  | 4.995807  | 7.760836  |
| C    | 11.060299 | 3.452486  | 7.620212  |
| C    | 12.664547 | 2.417516  | 6.094417  |
| H    | 13.598534 | 2.479583  | 5.522738  |
| C    | 10.284136 | 8.146587  | 13.220791 |
| H    | 11.081966 | 7.692497  | 13.819940 |
| C    | 8.517617  | 8.730820  | 6.137598  |
| H    | 8.208990  | 7.861462  | 5.552144  |
| O    | 14.417535 | 5.450413  | 9.040142  |
| C    | 10.800542 | 4.054444  | 10.417153 |
| H    | 10.114547 | 3.197368  | 10.555683 |
| H    | 11.830397 | 3.654037  | 10.393406 |
| C    | 6.863763  | 5.328128  | 6.967779  |
| H    | 6.507409  | 5.672115  | 5.989265  |
| C    | 10.646072 | 5.108926  | 11.521963 |
| H    | 11.069281 | 4.781851  | 12.490104 |
| H    | 9.578196  | 5.334369  | 11.693397 |
| C    | 10.241182 | 7.925651  | 11.826528 |
| C    | 10.268652 | 2.285335  | 7.542747  |
| H    | 9.320524  | 2.236882  | 8.091580  |
| C    | 8.806290  | 10.223872 | 7.878335  |
| H    | 8.784089  | 10.690107 | 8.865797  |



|   |           |           |           |
|---|-----------|-----------|-----------|
| C | 8.179192  | 8.987449  | 7.506402  |
| H | 7.541269  | 8.361568  | 8.133858  |
| C | 6.411974  | 4.520093  | 9.211041  |
| H | 5.704129  | 4.221627  | 9.994812  |
| C | 13.166312 | 7.905613  | 5.870407  |
| H | 13.733914 | 7.170442  | 5.267403  |
| H | 12.805252 | 8.696073  | 5.184947  |
| C | 9.216472  | 8.528127  | 11.069895 |
| H | 9.200740  | 8.375893  | 9.981762  |
| C | 8.732262  | 4.836637  | 8.477131  |
| C | 8.239921  | 5.284338  | 7.225315  |
| H | 8.950782  | 5.608603  | 6.456333  |
| C | 12.930873 | 6.942783  | 12.011590 |
| C | 13.468510 | 8.234956  | 12.224104 |
| H | 12.943216 | 9.106585  | 11.818665 |
| C | 13.641476 | 5.829121  | 12.506870 |
| H | 13.267745 | 4.814569  | 12.326609 |
| C | 15.360392 | 7.284325  | 13.432334 |
| H | 16.299123 | 7.416361  | 13.984106 |
| C | 14.842507 | 5.996644  | 13.215657 |
| H | 15.377587 | 5.116137  | 13.592034 |
| C | 14.671218 | 8.400338  | 12.928419 |
| H | 15.072240 | 9.409702  | 13.083171 |
| C | 13.469803 | 9.604068  | 7.804665  |
| H | 13.088871 | 10.428718 | 7.171680  |
| H | 14.247289 | 10.021122 | 8.473288  |
| C | 9.896083  | 9.940641  | 4.259325  |
| H | 10.251440 | 8.971169  | 3.862624  |
| H | 9.134196  | 10.324311 | 3.546919  |
| H | 10.748829 | 10.644364 | 4.232159  |

---

**Table S68.** [Cp'Ni<sup>III</sup>(pdt)Fe<sup>II</sup>(dppe)(CO)]<sup>2+</sup> with pdt Oriented Toward Ni  
 ([1d]<sup>2+</sup>, -3243.20978117 E<sub>h</sub>)

| atom | x         | y         | z         |
|------|-----------|-----------|-----------|
| Ni   | 10.255351 | 8.732063  | 7.486629  |
| Fe   | 11.512810 | 6.936698  | 8.763755  |
| P    | 11.231458 | 6.812331  | 11.110996 |
| S    | 11.888721 | 9.166757  | 8.888071  |
| P    | 10.524860 | 4.814414  | 8.725487  |
| S    | 11.384928 | 7.124800  | 6.503288  |
| C    | 11.166344 | 1.141591  | 6.995481  |
| H    | 10.627926 | 0.189579  | 6.946482  |
| C    | 12.421019 | 1.277753  | 6.375881  |
| H    | 12.862578 | 0.429299  | 5.843308  |
| C    | 8.146228  | 9.332228  | 12.163083 |
| H    | 7.091857  | 9.449526  | 11.890363 |
| C    | 7.677095  | 4.914910  | 9.024085  |
| H    | 7.823055  | 4.905147  | 10.108563 |
| C    | 8.714131  | 10.154317 | 13.153678 |
| H    | 8.104268  | 10.918694 | 13.645945 |
| C    | 9.297238  | 10.603728 | 7.132658  |
| H    | 9.789163  | 11.578324 | 7.155424  |
| C    | 10.058978 | 9.984560  | 13.519030 |
| H    | 10.500442 | 10.612526 | 14.299591 |
| C    | 13.188714 | 6.430990  | 8.837989  |
| C    | 12.541043 | 3.591480  | 7.119048  |
| H    | 13.085591 | 4.537926  | 7.158303  |
| C    | 9.100789  | 9.792317  | 5.980743  |
| C    | 13.252609 | 9.304778  | 6.352941  |
| H    | 12.455818 | 9.957676  | 5.951996  |
| H    | 14.198799 | 9.630636  | 5.875077  |
| C    | 6.140305  | 4.890852  | 7.134063  |
| H    | 5.116821  | 4.885662  | 6.745325  |
| C    | 11.284413 | 3.460554  | 7.745885  |
| C    | 13.105186 | 2.501703  | 6.436183  |
| H    | 14.080810 | 2.611673  | 5.951786  |
| C    | 10.844231 | 8.997045  | 12.901966 |
| H    | 11.882903 | 8.858902  | 13.215619 |
| C    | 8.438210  | 8.573228  | 6.449954  |
| H    | 8.171202  | 7.724987  | 5.816624  |
| O    | 14.327235 | 6.167572  | 8.840234  |
| C    | 10.505057 | 4.163593  | 10.481451 |
| H    | 9.765248  | 3.347183  | 10.564747 |
| H    | 11.503488 | 3.714716  | 10.633087 |
| C    | 7.231766  | 4.837929  | 6.248248  |
| H    | 7.060102  | 4.777291  | 5.168130  |
| C    | 10.238061 | 5.278765  | 11.499220 |
| H    | 10.438113 | 4.952712  | 12.535261 |
| H    | 9.184742  | 5.605350  | 11.479237 |
| C    | 10.280351 | 8.170020  | 11.906386 |
| C    | 10.593914 | 2.225651  | 7.674942  |
| H    | 9.607831  | 2.109929  | 8.138358  |
| C    | 8.736391  | 9.916649  | 8.290170  |
| H    | 8.748022  | 10.293029 | 9.314645  |

|   |           |           |           |
|---|-----------|-----------|-----------|
| C | 8.152033  | 8.688888  | 7.847302  |
| H | 7.635432  | 7.945546  | 8.454381  |
| C | 6.365597  | 4.924652  | 8.520651  |
| H | 5.519344  | 4.936209  | 9.215538  |
| C | 13.003704 | 7.858854  | 5.915546  |
| H | 13.807142 | 7.181146  | 6.250734  |
| H | 12.944497 | 7.798595  | 4.815419  |
| C | 8.925983  | 8.350842  | 11.534757 |
| H | 8.473810  | 7.713669  | 10.764899 |
| C | 8.779674  | 4.864941  | 8.140086  |
| C | 8.544485  | 4.828736  | 6.743663  |
| H | 9.385776  | 4.751161  | 6.046313  |
| C | 12.837879 | 6.672680  | 11.984529 |
| C | 13.777980 | 7.725090  | 11.861067 |
| H | 13.536973 | 8.612899  | 11.264706 |
| C | 13.172557 | 5.536343  | 12.754486 |
| H | 12.473817 | 4.702362  | 12.870358 |
| C | 15.340003 | 6.514824  | 13.279982 |
| H | 16.309263 | 6.453526  | 13.784959 |
| C | 14.419746 | 5.461458  | 13.395430 |
| H | 14.666758 | 4.576807  | 13.991031 |
| C | 15.015795 | 7.648391  | 12.514438 |
| H | 15.729131 | 8.474157  | 12.425013 |
| C | 13.406053 | 9.543259  | 7.857467  |
| H | 13.606022 | 10.610602 | 8.053850  |
| H | 14.235601 | 8.955311  | 8.286678  |
| C | 9.428833  | 10.123931 | 4.555549  |
| H | 9.732780  | 9.231509  | 3.983668  |
| H | 8.529674  | 10.536521 | 4.058010  |
| H | 10.221253 | 10.886506 | 4.481801  |

---

**Table S69.** [Cp'Ni<sup>III</sup>(pdt)Fe<sup>II</sup>(dppe)(CO)]<sup>2+</sup> with pdt Oriented Toward Fe ([1d]<sup>2+</sup>, -3243.20601950 E<sub>h</sub>)

| atom | x         | y         | z         |
|------|-----------|-----------|-----------|
| Ni   | 10.248362 | 8.718785  | 7.546427  |
| Fe   | 11.564028 | 6.918457  | 8.764927  |
| P    | 11.238996 | 6.814054  | 11.109595 |
| S    | 11.929672 | 9.154243  | 8.881183  |
| P    | 10.527850 | 4.819728  | 8.702769  |
| S    | 11.368444 | 7.151697  | 6.508585  |
| C    | 11.274220 | 1.112583  | 7.095564  |
| H    | 10.797073 | 0.128035  | 7.135261  |
| C    | 12.456559 | 1.296971  | 6.357266  |
| H    | 12.903916 | 0.453161  | 5.822186  |
| C    | 8.177382  | 9.360528  | 12.181257 |
| H    | 7.115949  | 9.472157  | 11.935004 |
| C    | 7.677205  | 4.939001  | 8.954890  |
| H    | 7.806953  | 4.961391  | 10.041344 |
| C    | 8.772910  | 10.205665 | 13.135518 |
| H    | 8.177121  | 10.981886 | 13.626495 |
| C    | 9.318866  | 10.597480 | 7.178055  |
| H    | 9.831420  | 11.561668 | 7.174955  |
| C    | 10.127803 | 10.044051 | 13.466194 |
| H    | 10.591468 | 10.690357 | 14.218377 |
| C    | 13.199131 | 6.281769  | 8.900829  |
| C    | 12.489300 | 3.646435  | 6.989101  |
| H    | 12.967875 | 4.627613  | 6.935839  |
| C    | 9.093234  | 9.765894  | 6.045642  |
| C    | 13.880390 | 8.597380  | 6.788135  |
| H    | 14.665999 | 9.094038  | 6.182756  |
| H    | 14.393644 | 7.798339  | 7.346224  |
| C    | 6.169665  | 4.862062  | 7.043127  |
| H    | 5.152150  | 4.846855  | 6.639279  |
| C    | 11.308061 | 3.466477  | 7.738253  |
| C    | 13.059726 | 2.562799  | 6.301475  |
| H    | 13.977447 | 2.710003  | 5.722933  |
| C    | 10.894629 | 9.040849  | 12.851738 |
| H    | 11.941321 | 8.908778  | 13.140181 |
| C    | 8.402801  | 8.573671  | 6.545666  |
| H    | 8.109991  | 7.718749  | 5.932815  |
| O    | 14.284008 | 5.861528  | 8.999691  |
| C    | 10.482755 | 4.177291  | 10.461481 |
| H    | 9.733474  | 3.369432  | 10.541494 |
| H    | 11.474822 | 3.720379  | 10.629723 |
| C    | 7.274079  | 4.784381  | 6.175649  |
| H    | 7.119045  | 4.695478  | 5.095059  |
| C    | 10.210235 | 5.298599  | 11.471454 |
| H    | 10.378284 | 4.968051  | 12.511604 |
| H    | 9.162922  | 5.641040  | 11.426106 |
| C    | 10.302547 | 8.189427  | 11.893264 |
| C    | 10.695672 | 2.189740  | 7.780440  |
| H    | 9.763374  | 2.034621  | 8.334936  |
| C    | 8.754611  | 9.946905  | 8.353685  |
| H    | 8.786164  | 10.342507 | 9.370345  |

|   |           |           |           |
|---|-----------|-----------|-----------|
| C | 8.135132  | 8.726374  | 7.940979  |
| H | 7.608435  | 8.008505  | 8.569012  |
| C | 6.373805  | 4.934111  | 8.431714  |
| H | 5.516953  | 4.965193  | 9.112894  |
| C | 12.884290 | 7.988424  | 5.799991  |
| H | 13.378283 | 7.209793  | 5.192741  |
| H | 12.476755 | 8.744757  | 5.105516  |
| C | 8.938890  | 8.363978  | 11.554571 |
| H | 8.465203  | 7.712670  | 10.810565 |
| C | 8.792563  | 4.862335  | 8.088997  |
| C | 8.579201  | 4.786572  | 6.691035  |
| H | 9.430592  | 4.689074  | 6.008854  |
| C | 12.824470 | 6.646175  | 12.016256 |
| C | 13.806753 | 7.655421  | 11.865246 |
| H | 13.613991 | 8.519446  | 11.218677 |
| C | 13.098036 | 5.537074  | 12.847471 |
| H | 12.365962 | 4.736026  | 12.986806 |
| C | 15.289702 | 6.458172  | 13.376582 |
| H | 16.244967 | 6.384764  | 13.906015 |
| C | 14.327279 | 5.446826  | 13.520216 |
| H | 14.527313 | 4.583031  | 14.162238 |
| C | 15.026139 | 7.564597  | 12.550521 |
| H | 15.773099 | 8.357078  | 12.437659 |
| C | 13.343310 | 9.650195  | 7.759105  |
| H | 12.973654 | 10.548064 | 7.232963  |
| H | 14.144181 | 9.973408  | 8.447071  |
| C | 9.421872  | 10.058258 | 4.611963  |
| H | 9.692954  | 9.145071  | 4.055882  |
| H | 8.533806  | 10.489085 | 4.110008  |
| H | 10.237558 | 10.794032 | 4.518607  |

---

**Table S70.** [CpNi<sup>II</sup>(SPh)<sub>2</sub>Fe<sup>II</sup>(dppv)(CO)]<sup>+</sup> with CO in Apical Position  
 ([2b]<sup>+</sup>, -3548.32358251 E<sub>h</sub>)

| atom | x         | y         | z         |
|------|-----------|-----------|-----------|
| Ni   | 3.243579  | 3.626153  | 9.816348  |
| Fe   | 2.463742  | 4.118076  | 7.341523  |
| P    | 3.380404  | 5.827987  | 6.156320  |
| P    | 3.505304  | 2.747667  | 5.852180  |
| S    | 2.060285  | 2.237824  | 8.593957  |
| S    | 1.763482  | 5.151470  | 9.231929  |
| O    | -0.081577 | 4.421410  | 5.982636  |
| C    | 0.019524  | 2.575541  | 10.550687 |
| H    | 0.729987  | 3.171056  | 11.130632 |
| C    | 2.603945  | 1.385196  | 4.979698  |
| C    | 0.397406  | 2.056337  | 9.297532  |
| C    | 4.155603  | 4.400367  | 11.573440 |
| H    | 3.853307  | 5.337452  | 12.044790 |
| C    | 5.156441  | 4.276829  | 10.520962 |
| H    | 5.745948  | 5.096846  | 10.111390 |
| C    | -2.178142 | 1.550291  | 10.304090 |
| H    | -3.181374 | 1.354175  | 10.696481 |
| C    | 1.077836  | 9.276575  | 5.958730  |
| H    | 0.901333  | 10.162288 | 6.578224  |
| C    | 5.044051  | 1.900119  | 6.435800  |
| C    | 1.197685  | 1.291853  | 5.015463  |
| H    | 0.612888  | 1.998561  | 5.608287  |
| C    | 0.975488  | 4.290094  | 6.478122  |
| C    | 2.244186  | 7.165337  | 5.593337  |
| C    | 4.953641  | 6.684242  | 6.649780  |
| C    | 4.089599  | 3.778020  | 4.446902  |
| H    | 4.499056  | 3.291403  | 3.551432  |
| C    | 1.999661  | 8.308856  | 6.386689  |
| H    | 2.533234  | 8.452564  | 7.331266  |
| C    | -0.506370 | 1.265837  | 8.556336  |
| H    | -0.200347 | 0.836477  | 7.596290  |
| C    | 3.499565  | 7.376564  | 9.675827  |
| H    | 4.348764  | 6.730861  | 9.442527  |
| C    | 7.467787  | 7.809642  | 7.265089  |
| H    | 8.442356  | 8.248287  | 7.504596  |
| C    | -1.268971 | 2.319580  | 11.047073 |
| H    | -1.559433 | 2.724897  | 12.022537 |
| C    | 3.979332  | 5.114866  | 4.560043  |
| H    | 4.306813  | 5.802755  | 3.768149  |
| C    | 5.275418  | 7.987406  | 6.215105  |
| H    | 4.552712  | 8.569779  | 5.635188  |
| C    | 1.089518  | 7.699583  | 9.902759  |
| H    | 0.072721  | 7.294157  | 9.861707  |
| C    | 3.706132  | 8.719528  | 10.030172 |
| H    | 4.727336  | 9.111994  | 10.083623 |
| C    | 2.668931  | -0.527998 | 3.461254  |
| H    | 3.247211  | -1.235482 | 2.857325  |
| C    | 0.386185  | 9.112536  | 4.747365  |
| H    | -0.332738 | 9.870385  | 4.418349  |
| C    | -1.792544 | 1.022993  | 9.060204  |

|   |           |           |           |
|---|-----------|-----------|-----------|
| H | -2.492081 | 0.411990  | 8.479639  |
| C | 5.236261  | 2.911758  | 10.148860 |
| H | 5.873846  | 2.473911  | 9.380205  |
| C | 7.466358  | 1.862911  | 6.750966  |
| H | 8.446668  | 2.325837  | 6.593433  |
| C | 4.269279  | 2.191865  | 10.955662 |
| H | 4.062828  | 1.122438  | 10.884860 |
| C | 6.525742  | 8.545893  | 6.528995  |
| H | 6.763524  | 9.560161  | 6.190421  |
| C | 1.540652  | 7.003455  | 4.378787  |
| H | 1.707871  | 6.116552  | 3.757049  |
| C | 2.189781  | 6.863720  | 9.607971  |
| C | 6.312051  | 2.496099  | 6.260034  |
| H | 6.402677  | 3.449232  | 5.727366  |
| C | 0.534401  | 0.294708  | 4.280969  |
| H | -0.558729 | 0.235030  | 4.315604  |
| C | 1.267186  | -0.616142 | 3.504784  |
| H | 0.748547  | -1.393268 | 2.933364  |
| C | 3.652644  | 3.104306  | 11.880036 |
| H | 2.900084  | 2.855823  | 12.628453 |
| C | 3.335797  | 0.465073  | 4.193102  |
| H | 4.429697  | 0.515223  | 4.159430  |
| C | 7.366177  | 0.633840  | 7.424125  |
| H | 8.267672  | 0.137838  | 7.799416  |
| C | 6.106216  | 0.034785  | 7.601040  |
| H | 6.023611  | -0.930534 | 8.112380  |
| C | 4.949793  | 0.660794  | 7.110405  |
| H | 3.975062  | 0.178693  | 7.238163  |
| C | 0.618636  | 7.974369  | 3.959059  |
| H | 0.082173  | 7.838373  | 3.014036  |
| C | 2.611749  | 9.555672  | 10.312580 |
| H | 2.777984  | 10.601403 | 10.592053 |
| C | 5.908606  | 5.944960  | 7.381394  |
| H | 5.665014  | 4.928745  | 7.713002  |
| C | 1.304835  | 9.043060  | 10.246013 |
| H | 0.447751  | 9.686483  | 10.471955 |
| C | 7.159372  | 6.504458  | 7.686322  |
| H | 7.896047  | 5.920901  | 8.250118  |

---

**Table S71.** [CpNi<sup>II</sup>(SPh)<sub>2</sub>Fe<sup>II</sup>(dppv)(CO)]<sup>+</sup> with CO in Basal Position  
 ([**2b**]<sup>+</sup>, -3548.32555524 E<sub>h</sub>)

| atom | x         | y         | z         |
|------|-----------|-----------|-----------|
| Ni   | 2.878177  | 3.503015  | 9.719936  |
| Fe   | 2.399186  | 4.248917  | 7.398816  |
| P    | 3.083344  | 2.862557  | 5.731861  |
| P    | 1.429031  | 5.466835  | 5.810708  |
| S    | 1.463176  | 2.375218  | 8.455764  |
| S    | 1.622112  | 5.274361  | 9.257231  |
| O    | 5.006940  | 5.514048  | 7.158519  |
| C    | -0.362620 | 2.851460  | 10.599011 |
| H    | 0.458621  | 3.326293  | 11.143344 |
| C    | 1.768177  | 7.279329  | 5.795996  |
| C    | -0.144912 | 2.359331  | 9.296979  |
| C    | 3.656348  | 3.802864  | 11.676821 |
| H    | 3.201863  | 4.465956  | 12.414501 |
| C    | 4.618522  | 4.212024  | 10.659755 |
| H    | 4.998348  | 5.225865  | 10.523694 |
| C    | -2.676917 | 2.090613  | 10.502466 |
| H    | -3.659374 | 1.982772  | 10.973796 |
| C    | 6.615338  | 0.979949  | 6.748728  |
| H    | 6.927939  | 0.210253  | 7.462860  |
| C    | -0.399580 | 5.370307  | 5.568153  |
| C    | 2.975801  | 7.764248  | 5.246362  |
| H    | 3.695151  | 7.070386  | 4.796463  |
| C    | 3.924918  | 5.055806  | 7.242653  |
| C    | 4.847410  | 2.336344  | 5.745793  |
| C    | 2.126476  | 1.336196  | 5.282550  |
| C    | 2.116890  | 4.920082  | 4.188316  |
| H    | 1.878210  | 5.482281  | 3.275581  |
| C    | 5.266490  | 1.359675  | 6.678708  |
| H    | 4.531269  | 0.886515  | 7.340263  |
| C    | -1.194904 | 1.715411  | 8.605006  |
| H    | -1.016014 | 1.301455  | 7.606708  |
| C    | 3.220386  | 7.637259  | 9.138036  |
| H    | 3.525531  | 7.364939  | 8.126537  |
| C    | 0.572664  | -0.867643 | 4.452195  |
| H    | -0.029684 | -1.723654 | 4.129921  |
| C    | -1.627735 | 2.716191  | 11.193986 |
| H    | -1.789005 | 3.098728  | 12.207938 |
| C    | 2.879208  | 3.809053  | 4.162942  |
| H    | 3.276319  | 3.391906  | 3.227490  |
| C    | 2.745238  | 0.111079  | 4.959850  |
| H    | 3.832710  | 0.007260  | 5.016289  |
| C    | 1.928912  | 7.196300  | 11.164702 |
| H    | 1.227338  | 6.563692  | 11.720198 |
| C    | 3.678554  | 8.836601  | 9.706722  |
| H    | 4.350749  | 9.480072  | 9.129295  |
| C    | 1.142414  | 9.559144  | 6.393385  |
| H    | 0.425524  | 10.256553 | 6.839681  |
| C    | 7.562382  | 1.583267  | 5.902448  |
| H    | 8.615339  | 1.288007  | 5.959645  |
| C    | -2.455002 | 1.587929  | 9.208850  |



|   |           |           |           |
|---|-----------|-----------|-----------|
| H | -3.261598 | 1.078884  | 8.669606  |
| C | 4.979928  | 3.064654  | 9.893163  |
| H | 5.674684  | 3.036176  | 9.053834  |
| C | -2.395843 | 5.890468  | 4.267230  |
| H | -2.861034 | 6.360415  | 3.394033  |
| C | 4.178797  | 1.972512  | 10.368212 |
| H | 4.165650  | 0.960091  | 9.961028  |
| C | 1.966669  | -0.986066 | 4.553464  |
| H | 2.458466  | -1.933776 | 4.309206  |
| C | 5.804647  | 2.940907  | 4.905002  |
| H | 5.503116  | 3.712719  | 4.188705  |
| C | 2.353067  | 6.806493  | 9.872919  |
| C | -1.007900 | 5.976531  | 4.444516  |
| H | -0.404044 | 6.529076  | 3.716021  |
| C | 3.256634  | 9.139449  | 5.265173  |
| H | 4.189476  | 9.508385  | 4.825175  |
| C | 2.341087  | 10.037833 | 5.838645  |
| H | 2.559503  | 11.111068 | 5.848479  |
| C | 3.395206  | 2.421343  | 11.505482 |
| H | 2.706050  | 1.807285  | 12.086322 |
| C | 0.853715  | 8.186100  | 6.374079  |
| H | -0.088413 | 7.821981  | 6.797761  |
| C | -3.187937 | 5.210033  | 5.209588  |
| H | -4.272545 | 5.149875  | 5.068949  |
| C | -2.589649 | 4.615635  | 6.331080  |
| H | -3.199427 | 4.091000  | 7.074162  |
| C | -1.197967 | 4.691997  | 6.510653  |
| H | -0.733766 | 4.229527  | 7.387555  |
| C | 7.155560  | 2.564475  | 4.985399  |
| H | 7.889669  | 3.039971  | 4.326314  |
| C | 3.277533  | 9.213735  | 10.998841 |
| H | 3.641811  | 10.149383 | 11.435960 |
| C | 0.721586  | 1.451666  | 5.174273  |
| H | 0.227290  | 2.401856  | 5.406614  |
| C | 2.397686  | 8.392651  | 11.725194 |
| H | 2.068771  | 8.686456  | 12.727779 |
| C | -0.047865 | 0.356525  | 4.756888  |
| H | -1.134492 | 0.461375  | 4.664481  |

---

**Table S72.** [CpNi<sup>I</sup>(SPh)<sub>2</sub>Fe<sup>II</sup>(dppv)(CO)]<sup>0</sup> with CO in Apical Position  
 ([**2b**]<sup>0</sup>, -3548.49276969 E<sub>h</sub>)

| atom | x         | y         | z         |
|------|-----------|-----------|-----------|
| Ni   | 3.335341  | 3.634989  | 9.745748  |
| Fe   | 2.412508  | 4.085211  | 7.373762  |
| P    | 3.344839  | 5.789927  | 6.246404  |
| P    | 3.485309  | 2.747433  | 5.920755  |
| S    | 2.004300  | 2.141955  | 8.585921  |
| S    | 1.686268  | 5.119376  | 9.275875  |
| O    | -0.140676 | 4.371959  | 5.997127  |
| C    | 0.057853  | 2.482456  | 10.600137 |
| H    | 0.849258  | 2.960380  | 11.185607 |
| C    | 2.619870  | 1.380954  | 4.996070  |
| C    | 0.341706  | 2.042280  | 9.290443  |
| C    | 4.276460  | 4.284776  | 11.655884 |
| H    | 3.891073  | 5.124259  | 12.237692 |
| C    | 5.245402  | 4.365048  | 10.608910 |
| H    | 5.777867  | 5.264503  | 10.297390 |
| C    | -2.237990 | 1.691671  | 10.384157 |
| H    | -3.239527 | 1.557530  | 10.808275 |
| C    | 1.174352  | 9.332962  | 5.964145  |
| H    | 1.046675  | 10.245563 | 6.556769  |
| C    | 5.041221  | 1.884822  | 6.453064  |
| C    | 1.215596  | 1.270735  | 5.013332  |
| H    | 0.624689  | 1.958487  | 5.622127  |
| C    | 0.921357  | 4.247943  | 6.497125  |
| C    | 2.247868  | 7.161629  | 5.660005  |
| C    | 4.935999  | 6.650381  | 6.709069  |
| C    | 4.074028  | 3.776166  | 4.507721  |
| H    | 4.488421  | 3.297241  | 3.609882  |
| C    | 2.067425  | 8.345239  | 6.408609  |
| H    | 2.625471  | 8.501978  | 7.336882  |
| C    | -0.673364 | 1.411356  | 8.539255  |
| H    | -0.449764 | 1.045929  | 7.531387  |
| C    | 3.353523  | 7.371867  | 9.729867  |
| H    | 4.206602  | 6.697333  | 9.626030  |
| C    | 7.479708  | 7.736991  | 7.279963  |
| H    | 8.464696  | 8.161595  | 7.504862  |
| C    | -1.226701 | 2.306952  | 11.139325 |
| H    | -1.435843 | 2.656000  | 12.157435 |
| C    | 3.956395  | 5.111173  | 4.631918  |
| H    | 4.279019  | 5.810597  | 3.847530  |
| C    | 5.307512  | 7.909137  | 6.190066  |
| H    | 4.608775  | 8.473067  | 5.563480  |
| C    | 0.944925  | 7.729496  | 9.704692  |
| H    | -0.068086 | 7.331116  | 9.580649  |
| C    | 3.547364  | 8.729905  | 10.031727 |
| H    | 4.565942  | 9.113592  | 10.161849 |
| C    | 2.718735  | -0.499214 | 3.435245  |
| H    | 3.311624  | -1.188504 | 2.823170  |
| C    | 0.446283  | 9.151553  | 4.777326  |
| H    | -0.251536 | 9.924307  | 4.435518  |
| C    | -1.955371 | 1.242612  | 9.082996  |

|   |           |           |           |
|---|-----------|-----------|-----------|
| H | -2.735497 | 0.754221  | 8.487320  |
| C | 5.429348  | 3.042016  | 10.068005 |
| H | 6.113217  | 2.759168  | 9.265992  |
| C | 7.473176  | 1.825681  | 6.690782  |
| H | 8.451362  | 2.284412  | 6.506016  |
| C | 4.591337  | 2.149567  | 10.805261 |
| H | 4.475301  | 1.081517  | 10.615929 |
| C | 6.570440  | 8.450037  | 6.481618  |
| H | 6.843867  | 9.432437  | 6.079591  |
| C | 1.505532  | 6.983333  | 4.471459  |
| H | 1.619980  | 6.063002  | 3.887352  |
| C | 2.050460  | 6.861212  | 9.558007  |
| C | 6.308569  | 2.466596  | 6.235620  |
| H | 6.387509  | 3.423922  | 5.708238  |
| C | 0.569374  | 0.284701  | 4.249249  |
| H | -0.523724 | 0.211990  | 4.274741  |
| C | 1.317902  | -0.602419 | 3.460417  |
| H | 0.812666  | -1.372986 | 2.867198  |
| C | 3.854404  | 2.917552  | 11.766871 |
| H | 3.118780  | 2.526872  | 12.472400 |
| C | 3.366146  | 0.484661  | 4.197700  |
| H | 4.460099  | 0.546221  | 4.181249  |
| C | 7.385167  | 0.600583  | 7.371929  |
| H | 8.293808  | 0.100341  | 7.725177  |
| C | 6.125559  | 0.018167  | 7.596583  |
| H | 6.048875  | -0.937795 | 8.126957  |
| C | 4.960063  | 0.652417  | 7.140612  |
| H | 3.982426  | 0.192015  | 7.318495  |
| C | 0.612903  | 7.973001  | 4.032582  |
| H | 0.044950  | 7.818708  | 3.108239  |
| C | 2.445484  | 9.592130  | 10.168129 |
| H | 2.599740  | 10.650358 | 10.407677 |
| C | 5.856615  | 5.936510  | 7.504171  |
| H | 5.563303  | 4.962435  | 7.913547  |
| C | 1.143968  | 9.085594  | 10.004860 |
| H | 0.277591  | 9.748298  | 10.114329 |
| C | 7.121757  | 6.476495  | 7.786822  |
| H | 7.826833  | 5.911965  | 8.407888  |

---

**Table S73.** [CpNi<sup>I</sup>(SPh)<sub>2</sub>Fe<sup>II</sup>(dppv)(CO)]<sup>0</sup> with CO in Basal Position  
 ([**2b**]<sup>0</sup>, -3548.4954561 E<sub>h</sub>)

| atom | x         | y         | z         |
|------|-----------|-----------|-----------|
| Ni   | 3.033132  | 3.461907  | 9.691595  |
| Fe   | 2.434672  | 4.162630  | 7.426474  |
| P    | 3.062561  | 2.855927  | 5.721793  |
| P    | 1.470828  | 5.453708  | 5.920275  |
| S    | 1.555553  | 2.241328  | 8.465781  |
| S    | 1.527425  | 5.223696  | 9.249375  |
| O    | 5.084684  | 5.352461  | 7.261298  |
| C    | -0.230697 | 2.699877  | 10.627916 |
| H    | 0.620066  | 3.130319  | 11.164960 |
| C    | 1.846232  | 7.265147  | 5.928016  |
| C    | -0.047916 | 2.246166  | 9.304463  |
| C    | 3.847048  | 3.897696  | 11.667472 |
| H    | 3.352585  | 4.586066  | 12.355248 |
| C    | 4.806340  | 4.256215  | 10.668786 |
| H    | 5.185344  | 5.260086  | 10.474491 |
| C    | -2.575905 | 2.032195  | 10.555728 |
| H    | -3.553996 | 1.947512  | 11.042644 |
| C    | 6.601643  | 0.958564  | 6.671329  |
| H    | 6.935065  | 0.260860  | 7.447789  |
| C    | -0.369152 | 5.429809  | 5.668635  |
| C    | 3.064307  | 7.727153  | 5.383408  |
| H    | 3.763075  | 7.017062  | 4.926282  |
| C    | 3.988579  | 4.911171  | 7.348763  |
| C    | 4.818750  | 2.282815  | 5.650518  |
| C    | 2.096721  | 1.340104  | 5.226302  |
| C    | 2.094200  | 4.958329  | 4.247355  |
| H    | 1.843050  | 5.553819  | 3.358582  |
| C    | 5.267463  | 1.391536  | 6.651987  |
| H    | 4.567639  | 1.044359  | 7.421293  |
| C    | -1.142664 | 1.671602  | 8.618326  |
| H    | -0.997342 | 1.291321  | 7.600937  |
| C    | 3.308476  | 7.464164  | 9.371107  |
| H    | 3.982401  | 6.957208  | 8.679170  |
| C    | 0.520813  | -0.847866 | 4.383905  |
| H    | -0.090214 | -1.697348 | 4.058525  |
| C    | -1.488184 | 2.593196  | 11.244169 |
| H    | -1.614954 | 2.950597  | 12.273031 |
| C    | 2.833522  | 3.833926  | 4.167166  |
| H    | 3.194177  | 3.438235  | 3.207514  |
| C    | 2.698406  | 0.103756  | 4.919877  |
| H    | 3.783023  | -0.015556 | 5.002190  |
| C    | 1.234451  | 7.541444  | 10.643048 |
| H    | 0.287776  | 7.074500  | 10.938714 |
| C    | 3.651060  | 8.729169  | 9.874773  |
| H    | 4.597190  | 9.188650  | 9.565428  |
| C    | 1.298217  | 9.552263  | 6.578200  |
| H    | 0.610347  | 10.259665 | 7.054376  |
| C    | 7.509857  | 1.426636  | 5.705625  |
| H    | 8.553992  | 1.095209  | 5.727074  |
| C    | -2.396187 | 1.568343  | 9.240911  |

|   |           |           |           |
|---|-----------|-----------|-----------|
| H | -3.232862 | 1.110947  | 8.699080  |
| C | 5.171263  | 3.058148  | 9.954037  |
| H | 5.877067  | 3.002788  | 9.124164  |
| C | -2.374281 | 6.067221  | 4.430420  |
| H | -2.843385 | 6.614477  | 3.604663  |
| C | 4.447239  | 1.965655  | 10.521588 |
| H | 4.472060  | 0.927770  | 10.184820 |
| C | 1.911111  | -0.985230 | 4.506841  |
| H | 2.392939  | -1.942582 | 4.277738  |
| C | 5.737694  | 2.751703  | 4.690204  |
| H | 5.417063  | 3.462489  | 3.921126  |
| C | 2.094490  | 6.854391  | 9.751983  |
| C | -0.984770 | 6.133791  | 4.609006  |
| H | -0.380852 | 6.748206  | 3.931158  |
| C | 3.387910  | 9.091895  | 5.426209  |
| H | 4.333166  | 9.439020  | 4.993508  |
| C | 2.505377  | 10.007012 | 6.023269  |
| H | 2.759643  | 11.072341 | 6.058974  |
| C | 3.601875  | 2.486869  | 11.561307 |
| H | 2.911364  | 1.905354  | 12.175114 |
| C | 0.967622  | 8.189375  | 6.531746  |
| H | 0.023464  | 7.843036  | 6.964920  |
| C | -3.163315 | 5.305964  | 5.311540  |
| H | -4.249427 | 5.259742  | 5.171657  |
| C | -2.559105 | 4.612793  | 6.371594  |
| H | -3.163775 | 4.023862  | 7.069987  |
| C | -1.166052 | 4.671741  | 6.549338  |
| H | -0.693354 | 4.135729  | 7.379430  |
| C | 7.076810  | 2.327332  | 4.720812  |
| H | 7.781877  | 2.704796  | 3.971575  |
| C | 2.798180  | 9.404005  | 10.763406 |
| H | 3.073803  | 10.389828 | 11.154580 |
| C | 0.695216  | 1.470980  | 5.102607  |
| H | 0.212778  | 2.425674  | 5.340323  |
| C | 1.586259  | 8.802439  | 11.144407 |
| H | 0.907817  | 9.317180  | 11.835083 |
| C | -0.084962 | 0.386094  | 4.678428  |
| H | -1.170023 | 0.505271  | 4.579969  |

---

**References:**

- (1) Pool, D. H.; DuBois, D. L. *J. Organomet. Chem.* **2009**, *694*, 2858.
- (2) McCarthy, B. D.; Martin, D. J.; Rountree, E. S.; Ullman, A. C.; Dempsey, J. L. *Inorg. Chem.* **2014**, *53*, 8350.
